# Supplementary material for: Is cupping therapy effective in patients with neck pain? A systematic review and meta-analysis
Source: PubMed Central journal article supplement — BMJ Open. 2018 Nov 5;8(11):e021070. doi: 10.1136/bmjopen-2017-021070 (PMC6231582; doi:10.1136/bmjopen-2017-021070), 2018-11-05
Supplement: bmjopen-2017-021070.draft_revisions.pdf [file bmjopen-2017-021070.draft_revisions.pdf]

# BMJ Open

BMJ Open is committed to open peer review. As part of this commitment we make the peer review history of every article we publish publicly available.

When an article is published we post the peer reviewers' comments and the authors' responses online. We also post the versions of the paper that were used during peer review. These are the versions that the peer review comments apply to.

The versions of the paper that follow are the versions that were submitted during the peer review process. They are not the versions of record or the final published versions. They should not be cited or distributed as the published version of this manuscript.

BMJ Open is an open access journal and the full, final, typeset and author-corrected version of record of the manuscript is available on our site with no access controls, subscription charges or pay-per-view fees (<http://bmjopen.bmj.com>).

If you have any questions on BMJ Open's open peer review process please email [info.bmjopen@bmj.com](mailto:info.bmjopen@bmj.com)

# BMJ Open

## Is cupping therapy effective in neck pain patients?: a systematic review and meta-analysis

|                               |                                                                                                                                                                                                                                                                                                                                                                                                                                                                                                                                                                                                                                                                                                                                                                                                                                                                     |
|-------------------------------|---------------------------------------------------------------------------------------------------------------------------------------------------------------------------------------------------------------------------------------------------------------------------------------------------------------------------------------------------------------------------------------------------------------------------------------------------------------------------------------------------------------------------------------------------------------------------------------------------------------------------------------------------------------------------------------------------------------------------------------------------------------------------------------------------------------------------------------------------------------------|
| Journal:                      | <i>BMJ Open</i>                                                                                                                                                                                                                                                                                                                                                                                                                                                                                                                                                                                                                                                                                                                                                                                                                                                     |
| Manuscript ID                 | bmjopen-2017-021070                                                                                                                                                                                                                                                                                                                                                                                                                                                                                                                                                                                                                                                                                                                                                                                                                                                 |
| Article Type:                 | Research                                                                                                                                                                                                                                                                                                                                                                                                                                                                                                                                                                                                                                                                                                                                                                                                                                                            |
| Date Submitted by the Author: | 08-Dec-2017                                                                                                                                                                                                                                                                                                                                                                                                                                                                                                                                                                                                                                                                                                                                                                                                                                                         |
| Complete List of Authors:     | <p>Kim, Seoyoun; Jaseng Medical Foundation, Jaseng Spine and Joint Research Institute; Korea University, Graduate school of Public Health</p> <p>Kim, Me-rieng; Jaseng Medical Foundation, Jaseng Spine and Joint Research Institute</p> <p>Kim, Eun-jung; Dongguk University, Dept. of Acupuncture &amp; Moxibustion, College of Korean Medicine</p> <p>Hwang, Deok-Sang; Kyung Hee University, Department of Korean Medicine Obstetrics &amp; Gynecology, College of Korean Medicine</p> <p>Lee, Jinho; Jaseng Medical Foundation, Jaseng Spine and Joint Research Institute</p> <p>Shin, Joon-Shik; Jaseng Medical Foundation, Jaseng Spine and Joint Research Institute</p> <p>Ha, In-Hyuk; Jaseng Medical Foundation, Jaseng Spine and Joint Research Institute</p> <p>Lee, Yoon Jae; Jaseng Medical Foundation, Jaseng Spine and Joint Research Institute</p> |
| Keywords:                     | Neck pain, Complementary Therapies, Meta-Analysis, Systematic Review                                                                                                                                                                                                                                                                                                                                                                                                                                                                                                                                                                                                                                                                                                                                                                                                |
|                               |                                                                                                                                                                                                                                                                                                                                                                                                                                                                                                                                                                                                                                                                                                                                                                                                                                                                     |

SCHOLARONE™  
Manuscripts

## Is cupping therapy effective in neck pain patients?: a systematic review and meta-analysis

Seoyoun Kim ([scheffer@korea.ac.kr](mailto:scheffer@korea.ac.kr)),<sup>1,2</sup> Me-riونغ Kim ([krmkmr@naver.com](mailto:krmkmr@naver.com)),<sup>1</sup> Eun-Jung Kim ([hanijjung@naver.com](mailto:hanijjung@naver.com)),<sup>3</sup> Deok-Sang Hwang ([soulhus@gmail.com](mailto:soulhus@gmail.com)),<sup>4</sup> Jinho Lee ([jasengjsr@gmail.com](mailto:jasengjsr@gmail.com)),<sup>1</sup> Joon-Shik Shin ([Jasengmaster@gmail.com](mailto:Jasengmaster@gmail.com)),<sup>1</sup> In-Hyuk Ha ([hanihata@gmail.com](mailto:hanihata@gmail.com)),<sup>1</sup> Yoon Jae Lee ([goodsmile8119@gmail.com](mailto:goodsmile8119@gmail.com))<sup>1\*</sup>

<sup>1</sup>Jaseng Spine and Joint Research Institute, Jaseng Medical Foundation, Seoul, Republic of Korea

<sup>2</sup>Graduate school of Public Health, Korea University, Seoul, Republic of Korea

<sup>3</sup>Department of Acupuncture & Moxibustion, College of Korean Medicine, Dongguk University, Gyeongju, Republic of Korea

<sup>4</sup>Department of Korean Medicine Obstetrics & Gynecology, College of Korean Medicine, Kyung Hee University, Seoul, Republic of Korea

### \*Corresponding author

Yoon Jae Lee

Jaseng Spine and Joint Research Institute

Jaseng Medical Foundation

3F Jung-il Bldg, 538 Gangnam-daero, Gangnam-gu, Seoul, Republic of Korea 06110

E-mail: [goodsmile8119@gmail.com](mailto:goodsmile8119@gmail.com)

Tel: +82 2 3218 2456

Fax: +82 2 3218 2244

## ABSTRACT

**Objectives:** Neck pain is an important condition that is second only to depression as a cause of years lived with disability worldwide, which should prompt the search for effective treatment modalities. This systematic literature review aimed to investigate the effects of cupping on neck pain without limitations on language of publication.

**Design:** Systematic review and meta-analysis of randomised controlled trials

**Setting:** Nine databases, including Chinese, Korean and Japanese databases, through to July 2016 without language restriction

**Participants:** Neck pain patients

**Interventions:** Cupping therapy as the sole, or the add-on, intervention compared with no treatment or active control

**Primary and secondary outcome measures:** Pain severity, functional disability, and quality of life

**Results:** Seventeen RCTs were selected. Compared with the no intervention group, the cupping group exhibited a significant reduction in pain (standardized mean difference [SMD] -1.57 [95% CI -2.41 to -0.73]), improvement in function (SMD -0.59 [95% CI -1.01 to -0.17]), and improvement in quality of life (SMD 0.57 [95% CI 0.29 to 0.85]). Compared with active control, the cupping group reported a significant reduction in pain (P=0.0007) and significant improvement in quality of life (P=0.009). The group that received control treatment with cupping therapy (add-on group) exhibited a significant reduction in pain compared with the active control group (P=0.0004). Although the selected studies described mild side effects of cupping, none were serious.

**Conclusions:** Cupping was found to significantly lower pain in the no intervention, active control, and add-on comparisons. Depending on the type of control group, cupping also had significant effects on functional improvement and quality of life; however, it was difficult to draw definitive conclusions due to a low to very low quality of evidence. It is anticipated that well-designed studies in the future would be able to substantiate the effectiveness of cupping on neck pain.

**Keywords:** Neck pain, Complementary Therapies, Meta-Analysis, Systematic Review

1  
2  
3  
4 **ARTICLE SUMMARY**

5 **Strengths and limitations of this study**

- 6 • This systematic review, investigating the efficacy of cupping in treating pain, placed no restrictions on  
7 publication language.  
8  
9 • Nine databases, from several countries, were searched for randomized controlled trials and included  
10 stringent inclusion and exclusion criteria.  
11  
12 • The analysis also addressed risk for bias, safety of cupping, and levels of evidence.  
13  
14 • This review may have been limited by heterogeneity across the selected studies, and low to very low  
15 levels of evidence.  
16  
17  
18  
19  
20  
21  
22  
23  
24  
25  
26  
27  
28  
29  
30  
31  
32  
33  
34  
35  
36  
37  
38  
39  
40  
41  
42  
43  
44  
45  
46  
47  
48  
49  
50  
51  
52  
53  
54  
55  
56  
57  
58  
59  
60

For peer review only

## INTRODUCTION

Studies analysing the 20 major causes of years lived with disability (YLD) from 2000 to 2012 worldwide reported that neck pain is the second leading cause of YLD following depression.<sup>1</sup> Furthermore, a Dutch study revealed that neck pain was associated with 1% of total medical expenditures and 0.1% of GDP, 77% of which were indirect medical expenses associated with absence from work or disability expenses.<sup>2</sup> As reported in the present review, neck pain is an important condition that directly escalates medical costs and negatively impacts productivity such as long-term absence(s) from work.

Neck pain is a common disease with a lifelong prevalence of 14.2% to 71% in adults, although these figures vary across studies.<sup>3</sup> The disease easily progresses to a chronic condition, with approximately 25% to 60% of patients progressing to chronic back or neck pain in the first year after onset.<sup>4</sup> Furthermore, neck pain is known to be most prevalent among the most active age group, particularly individuals 35 to 49 years of age, and subsides in subsequent years<sup>5</sup>; it is also more common in women.<sup>3</sup>

The standard first-line therapy for neck pain can be classified into drug and non-drug therapies. Drug therapy usually involves acetaminophen and nonsteroidal anti-inflammatory drugs (NSAIDs). However, acetaminophen and NSAIDs increase the risk for reduced liver function, liver failure, and haemorrhagic gastritis,<sup>6</sup> and these side effects may be more common when the drugs are used long-term for neck pain, which often becomes chronic. For these reasons, many studies have investigated and demonstrated the clinical efficacy of complementary and alternative medicine therapies, including acupuncture, on chronic pain such as spinal pain.<sup>7</sup>

Cupping is a physical treatment used by acupuncturists and other therapists that involves the use of a glass or bamboo cup to create suction on the skin over a painful area or acupuncture point. There are two types of cupping: dry and wet. Dry cupping is a technique in which cups are attached to the skin to create suction without drawing blood, whereas wet cupping is a technique in which blood is drawn before attaching the cups. Cupping therapy is used for post-stroke rehabilitation and hypertension, and has been reported to be effective for pain and musculoskeletal disorders.<sup>8-10</sup> In particular, cupping is a highly popular insurance-covered therapy in South Korea; insurance claims for cupping reached 215,079,729,000 won in 2013 alone.<sup>11</sup> Studies reporting the effects of cupping on neck pain include a systematic literature review published by Yuan et al. in 2015, which reported that cupping is effective in reducing pain and improving function(s) in chronic neck pain.<sup>12</sup> However, that systematic review searched articles published in or before 2013 and, because new clinical trials investigating cupping on neck pain have been published since, a new systematic review on the topic is needed. Moreover, Yuan et al<sup>12</sup> restricted the publication language of the articles. To review a more diverse pool of articles before drawing conclusions, however, the present review, in contrast, did not place any restrictions on language.

## METHODS

The protocol of this systematic literature review was registered in the PROSPERO International prospective register of systematic reviews (CRD42016047218). This review was performed and reported in adherence with the Preferred Reporting Items for Systematic Reviews and Meta Analyses (PRISMA).<sup>13</sup>

### Literature search

Studies that used cupping as the intervention for neck pain were searched in the Ovid-Medline (1946 to July 2016), Ovid-EMBASE (1980 to July 2016), Ovid-AMED (1985 to July 2016), and the Cochrane Central

1  
2  
3  
4 Register of Controlled Trials (CENTRAL) to July 22, 2016. The Chinese database China National Knowledge  
5 Infrastructure (CNKI), Korean databases OASIS and NDSL, and Japanese databases J-stage and ISHUSHI,  
6 were also used. Search terms included a combination of MeSH terms such as neck pain (e.g., Neck pain,  
7 cervical spondylosis, cervical radiculopathy, cervical disc herniation, and myofascial pain syndrome) and  
8 cupping. Details of the search strategy are presented in Appendix 1. Importantly, there were no language  
9 restrictions.  
10  
11

### 12 13 **Study inclusion and exclusion**

14 Two or more investigators (YJL, SYK, and/or YMK) independently selected articles for analysis from the  
15 searched articles. After excluding duplicate publications, titles and abstracts were reviewed to primarily screen  
16 out articles according to the inclusion and exclusion criteria. The full texts of these articles were then reviewed  
17 to again secondarily screen out articles per the inclusion and exclusion criteria. Only randomized controlled  
18 clinical trials (RCTs) were considered. Any disagreement in the study selection process was resolved by  
19 discussion and, when an agreement was not reached, a third investigator intervened to reach consensus.  
20 Publication language of the study was not restricted. Subjects included adult patients with neck pain, including  
21 neck pain with neuropathy, without discriminating between acute and chronic. However, post-traumatic pain  
22 caused by whiplash or sports injuries was excluded because the natural history of neck pain may differ in such  
23 cases. Furthermore, patients with myelopathy or cervical headache/vertigo without neck pain were also excluded.  
24 All types of cupping therapies were included without restrictions dry or wet cupping; the type of cupping  
25 devices were also not restricted. Control groups included patients who underwent usual care for neck pain, such  
26 as physical therapy, NSAIDs, heat pad therapy, and acupuncture, as well as inactive controls, such as waitlist or  
27 no intervention groups. The outcome variables to assess the efficacy of cupping were pain intensity, neck  
28 disability index, and quality of life (QoL). Pain intensity was measured using a visual analogue scale (VAS), the  
29 McGill Pain Questionnaire, the Northwick Park Neck Pain Questionnaire (NPQ). The Neck Disability Index  
30 (NDI) was generally used to measure neck functional disability. QoL was assessed using the 36-item Short-form  
31 (SF-36) and EQ5D questionnaires. However, studies that did not use objective instruments and only reported  
32 outcomes in terms of improvement rates without a standard, or investigations that used an instrument without  
33 verified reliability and validity, were excluded.  
34  
35  
36  
37  
38  
39  
40  
41  
42

### 43 **Risk for bias evaluation and data extraction**

44 Risk for bias in the RCTs was assessed according to seven categories per the Cochrane Risk of Bias. Studies that  
45 used appropriate methods for each item and specified the methods in the text were considered to have a low risk  
46 for bias; studies that did not perform or used inappropriate methods were considered to have a high risk for bias;  
47 and studies that did not mention or used ambiguous expressions were considered to have an unclear risk for bias.  
48 Two or more investigators independently assessed all research data, and disagreements were resolved by  
49 discussion. When an agreement could not be reached, a third investigator intervened to reach consensus. Two  
50 reviewers independently read the full text of all articles and extracted data according to a pre-determined format.  
51 Any disagreements were resolved by discussion between the two reviewers.  
52  
53  
54  
55

### 56 **Data analysis**

1  
2  
3  
4 A meta-analysis was performed using the quantitative data from each study to assess the efficacy of cupping.  
5 The standardized mean difference (SMD) and 95% confidence interval (CI) were calculated using the Cochrane  
6 Collaboration software (Review Manager [RevMan] version 5.3, Copenhagen: The Nordic Cochrane Centre) for  
7 Windows (Microsoft Corporation, Redmond, WA USA). Heterogeneity across studies was assessed using the  $\chi^2$   
8 (chi-squared) test with a significance of  $P < 0.10$  and the  $I^2$  statistic. When heterogeneity was statistically  
9 significant, the cause of heterogeneity was analysed through subgroup analysis. A random effect model was  
10 applied, and publication bias was not assessed when the number of studies in the group was  $< 10$ .  
11  
12

### 13 14 15 **Quality of evidence**

16 The quality of evidence for each outcome was assessed in accordance with the Grading of Recommendations,  
17 Assessment, Development and Evaluation (GRADE). Quality of evidence was classified into high, moderate,  
18 low, or very low. To determine the quality of evidence, the following domains were assessed according to the  
19 standards suggested by the GRADE group: risk for bias; imprecision; inconsistency; indirectness; publication  
20 bias; large magnitude of effect; dose-response; and confounding.<sup>14</sup>  
21  
22

## 23 24 **RESULTS**

### 25 **Search results**

26 A total of 1861 articles were retrieved, including 53 from Ovid-Medline, 123 from Ovid-EMBASE, 17 from  
27 Ovid-AMED, 37 from the Cochrane Library, and 157 from a Chinese database. After the first and second round  
28 of screening, a total of 17 articles were selected for review. Search results are shown in Figure 1.  
29  
30

### 31 **Features of the included studies**

32 A total of 17 studies were analysed in two separate analyses: direct comparison of the cupping (sole) and control  
33 groups; and an add-on analysis comparing the cupping with control group with the control group. Two studies  
34 used three groups; 11 studies were included in the sole analysis while eight studies were included in the add-on  
35 analysis.  
36

37 Seven of the 17 studies used wet cupping while nine used dry cupping; the remaining study mainly used dry  
38 cupping but also used wet cupping. The frequency of cupping therapy varied greatly. Two studies performed  
39 only one round of therapy, and four performed two to three rounds. The majority of studies performed  $>10$   
40 rounds of therapy because most treated patients had neck pain with radiculopathy or chronic neck pain. The site  
41 of therapy was mostly the upper shoulder and neck area, primarily on the ashi acupoint or other acupoints in  
42 proximity. Because these studies treated pain, most presented pain scores in the form of a VAS; disability was  
43 presented in NDI, while QoL was mostly reflected in the responses to the EQ-5D and SF-36 questionnaires. The  
44 features of each study are presented in Table 1.  
45  
46

### 47 **Risk for bias assessment**

48 **Random sequence:** Seven of the 17 studies<sup>15-21</sup> were assessed to have a low risk for bias because they randomly  
49 allocated the subjects using a table of random numbers. The remaining 10 studies, however, only mentioned  
50 randomly assigning subjects without specifying the method used for randomization; thus, these studies were  
51 assessed to have an unclear risk for bias. The results are shown in Figure 2.  
52  
53

54 **Allocation concealment:** Eight studies<sup>15 17-19 21-24</sup> concealed allocation using a sealed envelope and, thus, were  
55  
56  
57  
58  
59



assessed to have a low risk for bias. The remaining studies were determined to be unclear because they did not describe the method of allocation concealment used.

**Blinding:** Control groups were either wait control or active controls. There was one study that included sham cupping,<sup>25</sup> however, blinding is practically difficult, given that sham cupping is generally not used. Chi et al<sup>22</sup> described single blinding; however, it was difficult to conclude whether blinding was actually implemented. Hence, all studies were considered to not have blinded their investigators and/or participants. With regard to the blinding of participants and personnel, all studies were assessed to have a high risk for bias. Similarly, blinding of outcome assessment was not performed in most studies because many used VAS for pain measurement and used patient-reported outcomes. Blinding could have been feasible if the studies used an outcome variable measured by the examiner; however, such studies were lacking. Therefore, all studies were assessed to have high risk for bias.

**Incomplete outcome data:** Five studies<sup>15 17 18 23 24</sup> reported the number of excluded and withdrawn participants, and the number of participants included in the final analysis. It was decided that the number of withdrawn participants and the reason for withdrawal were not a cause of bias; therefore, these studies were assessed to have low risk for bias. The remaining studies were determined to be unclear for not mentioning the number of participants who withdrew or were excluded.

**Selective reporting:** Ten of the 17 studies were determined to have an unclear risk for bias due to selective reporting because they did not describe adverse events and did not registered their protocols. The remaining seven studies<sup>15 17 18 20 22-24</sup> were found to have reported all of the outcome variables they initially had attempted to investigate and, thus, were determined to have a low risk for bias.

**Other biases:** All studies were assessed to have low risk for other biases.

## Analysis

### *Cupping versus no treatment*

**Pain:** Four studies<sup>22-24 26</sup> were included in the meta-analysis. Compared with the no intervention group, the cupping group reported a significant reduction in pain, with an SMD of -1.57 (95% CI -2.41 to -0.73). Notable heterogeneity was observed ( $I^2=84\%$ ;  $P=0.0002$  [chi-square test]); however, the direction of efficacy of was consistent.

**Disability:** Two studies were included in the analysis. The results revealed that the cupping group reported significant functional improvement compared with the no intervention group, with an SMD of -0.59 (95% CI -1.01 to -0.17;  $I^2=0\%$ ;  $P=0.006$ ).

**QoL:** Two studies were included in the analysis, and results revealed that the cupping group reported a significant improvement in QoL, with an SMD of 0.53 (95% CI 0.11 to 0.95;  $I^2=0\%$ ;  $P=0.01$ ) (Figure 3).

### *Cupping versus active control*

**Pain:** Seven studies were included in the analysis. Compared with the control group, the cupping group exhibited a significant reduction in pain, with an SMD of -0.42 (95% CI -0.66 to -0.18;  $P=0.0007$ ). A chi-square test, however, revealed some heterogeneity ( $p=0.09$ ;  $I^2=46\%$ ), but not to a notable degree.

**Disability:** Four studies were included in the analysis. Compared with control, the cupping group demonstrated functional improvement, with an SMD of -0.50 (95% CI -1.06 to 0.06;  $P=0.08$ ), but not to a statistically significant degree, and heterogeneity was high ( $I^2=75\%$ ;  $P=0.007$ ).

1  
2  
3  
4 *QoL*: Two studies were included in this analysis. Compared with control, the cupping group reported a  
5 significant improvement in quality of life, with an SMD of 0.61 (95% CI 0.15 to 1.07; P=0.009) (Figure 4).

#### 6 ***Cupping with active control versus active control (add-on)***

7  
8 *Pain*: Eight studies were included in the analysis. When analysed comprehensively, adding cupping therapy to  
9 the treatment given to the control group led to a significant reduction in pain, with an SMD of -0.78 (95% CI -  
10 1.21 to -0.34; P=0.0004). However, notable heterogeneity was observed; therefore, a subgroup analysis was  
11 performed for each type of cupping therapy. For dry cupping therapy, efficacy demonstrated an SMD -0.61 (95%  
12 CI -0.79 to -0.43, P<0.00001), with a heterogeneity of  $I^2=0\%$ , P=0.92. On the other hand, wet cupping therapy  
13 led to a significant reduction in pain, with an SMD of -0.96 (95% CI -1.84 to -0.08, P=0.03); however,  
14 heterogeneity was persistent in the wet cupping group ( $I^2=93\%$ ; P<0.00001).

15  
16  
17 *Disability*: Only one study reported a disability-related outcome, and the effect on disability was not significant,  
18 with an SMD of 0.25 (95% CI -0.28 to 0.77; P=0.36) (Figure 5).

#### 20 21 **Safety of cupping**

22 Ten of the 17 studies included in the final analysis did not address safety, while seven studies did. First, Kim et  
23 al<sup>17</sup> reported one case of skin laceration, one case of whole body itching, one case of pain at the cupping sites,  
24 and one case of generalized body ache in four patients in the cupping group; however, the study reported that the  
25 symptoms were mild and resolved within a few days. Lauche et al (2012)<sup>24</sup> reported one case of pain during the  
26 procedure itself in addition to tension headache, migraine, tinnitus, and wound healing itches; however, all side  
27 effects were mild and temporary. Chi et al<sup>22</sup> reported two cases of mild low back pain due to the seated position  
28 in the cupping group. Lauche et al (2013)<sup>18</sup> reported one case of muscular tension, one case of increased pain,  
29 and one case of prolapsed intervertebral disc, while Lauche et al (2011)<sup>23</sup> reported one case of tingling sensation  
30 in the hands and arms, two cases of strain/pain at the treated area, one case of strain/pain in their general neck  
31 region, one case of slight headache, one case of tiredness, one case of shivering attack, and one case of blurred  
32 vision. Yin et al<sup>20</sup> reported one case of delayed wound healing due to wet cupping. Cramer et al<sup>15</sup> reported two  
33 cases of muscle soreness, one case of minor hematoma, and two cases of increased neck pain for 1 h to 5 h.  
34 None of the reported side effects caused by cupping were serious in nature.

#### 40 41 **Levels of evidence**

42 The quality of evidence in each analysis is shown in Table 2. In the waitlist comparison, the quality of evidence  
43 for the outcomes of pain, QoL, and disability was assessed to be low due to concerns over risk for bias and  
44 imprecision domain. In the active control comparison, the quality of evidence for the outcomes of pain and QoL  
45 was low in consideration of a risk for bias and imprecision, and that for disability was assessed to be very low  
46 due to a risk for bias, imprecision, and unexplained heterogeneity. In the add-on comparison between the active  
47 control group and active control with cupping group, the quality of evidence for pain for the dry cupping add-on  
48 group was low due to a risk for bias and unexplained heterogeneity. The quality of evidence for pain outcomes  
49 for the wet cupping add-on group was very low. The quality of evidence for disability outcomes for the add-on  
50 groups was low due to a risk for bias and imprecision (Table 2).

## DISCUSSION

The present study aimed to reveal evidence supporting the efficacy of cupping on neck pain through a systematic literature review. We performed a systematic and wide search in non-Asian as well as Asian databases, including those from China, Korea, and Japan, where cupping is popular. Seventeen articles were selected and were analysed according to the type of control group(s) used. When compared with an inactive control, cupping significantly reduced pain, improved function(s), and improved QoL. Although heterogeneity was quite high in terms of pain reduction, we did not lower the quality of evidence because the direction of effects was consistent across all studies. When compared with an active control, the cupping group exhibited a significant reduction in pain but no significant differences in functional improvement. The quality of evidence was found to be low or very low in most studies; however, the marked reduction in pain, functional improvement, and improvement in QoL associated with cupping compared with no intervention may be clinically relevant. Notable heterogeneity was observed for pain outcomes in the comparison between the cupping and no intervention groups. The direction of effects was consistent, which suggests that the heterogeneity was a result of the size of the effect, which we speculate to be caused by differences in operator cupping proficiency and patients' pain severity. When compared with an active control group receiving various therapies, cupping significantly reduced pain but did not demonstrate significant differences in functional improvement. When added on to existing treatment, cupping significantly reduced pain, with an SMD of -0.78 (95% CI -1.21 to -0.34). However, heterogeneity was high; therefore, we performed a subgroup analysis. Effect sizes were similar across studies using dry cupping; however, effect sizes varied greatly across studies using wet cupping. Additional analysis is needed to substantiate whether the differences are caused by differences in various types of wet cupping procedures or whether other factors are in play. Wet cupping involves drawing blood before cupping, and may be well accepted by some cultures, but cause fear in others. Furthermore, the intensity of the procedure and the amount of bleeding may also affect outcome, which may have contributed to the varying effect sizes. However, the type and frequency of the procedure, and patients' pain severity may have also led to the varying effect sizes.

This study had several limitations. One significant shortcoming was that only some studies reported issues related to safety. Although severe adverse events were not found in association with cupping in the studies that reported side effects, there were a greater number of studies that did not report side effects, which should prompt well-designed, large-scale study to investigate the side effects of cupping. A systematic review investigating the side effects of cupping reported that the most common side effect was scar formation and there were some cases of severe side effects.<sup>27</sup> However, adverse reactions to cupping may vary according to the proficiency of the practitioner, type of procedure, and disinfection and sterilization during the procedure.<sup>27</sup> Another limitation was that the quality of evidence was either low or very low for all outcomes. The primary causes of the low quality of evidence were risk for bias and unexplained heterogeneity. The quality of evidence for random sequence and allocation concealment could have not been lowered if the studies were performed correctly; however, the selected studies did not maintain meticulous procedures regarding these issues. Nevertheless, cupping is an invaluable therapy that anyone properly trained can use easily. Lauche et al (2013)<sup>18</sup> performed a clinical trial on home-based cupping. Due to the growing use of computers and smartphones, neck pain has become quite common<sup>28</sup> and readily becomes chronic. The findings of our study are meaningful because it represents a non-

1  
2  
3  
4  
5  
6  
7  
8  
9  
10  
11  
12  
13  
14  
15  
16  
17  
18  
19  
20  
21  
22  
23  
24  
25  
26  
27  
28  
29  
30  
31  
32  
33  
34  
35  
36  
37  
38  
39  
40  
41  
42  
43  
44  
45  
46  
47  
48  
49  
50  
51  
52  
53  
54  
55  
56  
57  
58  
59  
60

invasive, simple, and effective treatment modality for patients with chronic pain.

In traditional Chinese medicine, cupping has been popularly used to eliminate stagnated qi and blood, and to facilitate circulation.<sup>29</sup> Since ancient times, cupping has been deemed to be effective on local areas of inflammation.<sup>30</sup> A review of various studies related to the mechanism of cupping reveals that cupping exerts its effects via a haemodynamic mechanism that facilitates muscle function, as demonstrated by the reduction of deoxy-haemoglobin and elevated oxy-haemoglobin levels in muscle areas treated with cupping.<sup>31</sup> In other studies, cupping was reported to be involved in a mechanism for removing oxidative stress,<sup>32</sup> and that cupping produces therapeutic effects through diffuse noxious inhibitory control,<sup>33</sup> which would have contributed to the elimination of pain.

For these reasons, a growing number of clinical trials are investigating the effects of cupping on pain and disease. In a systematic literature review of the efficacy of cupping in lower back pain, cupping led to significant reductions in pain and improvement of function.<sup>12</sup> A recent systematic review investigated cupping in relation to overall disease;<sup>34</sup> however, the review only included some articles about neck pain and did not specifically discuss neck pain. Furthermore, there was a study that examined the effect of cupping on neck pain, but the study was published in 2013<sup>12</sup>. In this context, our study, which analysed more recent evidence of the effects of cupping on neck pain without a language restriction, is meaningful.

A new clinical trial that was not included in the present analysis was published recently.<sup>35</sup> Due to the publication date settings in our search, the results of our analysis including this particular study<sup>35</sup> were not presented in our results. However, when the study was included in our analysis, the statistical significance of the pain and functional improvement in the cupping group against the no intervention group were not altered (pain: SMD -1.37 [95% CI -2.11 to -0.62], disability: SMD -0.63 [95% CI -0.97 to -0.28]), and only the QoL outcome became statistically insignificant (SMD 0.33 [95% CI -0.08 to 0.73]).

Cupping has been found to be effective compared with no treatment and to conventional treatment. In particular, adding cupping therapy to conventional treatment led to a more significant reduction in pain, suggesting that adjunctive cupping therapy would produce the best outcome. Although we did not find notable adverse events in the articles we reviewed in this study, cupping is not without side effects, and a large-scale study is needed to thoroughly examine cupping side effects. Furthermore, wet cupping requires thorough hygiene education and precautions during the procedure because it induces bleeding during the procedure. A well designed large-scale clinical trial using a standardized procedure is still needed. Nevertheless, our study is meaningful in that it sheds light on the promising nature of cupping as a safe and effective treatment for neck pain.

## CONCLUSION

Cupping was found to significantly reduce neck pain compared with an inactive control group and active control group receiving standard medical care. Cupping may be an effective non-invasive treatment for neck pain, which is becoming more prevalent among younger patients and may induce disability when it becomes chronic. However, additional well-designed studies are needed to draw definitive conclusions.

## FOOTNOTES

1  
2  
3  
4 **Contributors:** SK, MRK, IHH, and YJL designed the study. SK and YJL conducted the systematic search. SK,  
5 MRK, and YJL assessed the literatures for inclusion and extracted the data. JL, JSS, and IHH monitored data  
6 collection. EJK, DSH, JL, JSS, and IHH interpreted the data. SK, MRK, IHH, and YJL wrote the draft; EJK,  
7 DSH, JL, and JSS critically revised the manuscript. All authors have read and approved the final version.  
8

9 **Funding:** This study was supported by the Traditional Korean Medicine R&D Program funded by the Ministry  
10 of Health & Welfare through the Korea Health Industry Development Institute (KHIDI) (HB16C0035).  
11

12 **Competing Interests:** None declared

13 **Provenance and peer review:** Not commissioned; externally peer reviewed.  
14

15 **Data sharing statement:** No additional data are available.  
16  
17  
18  
19  
20  
21  
22  
23  
24  
25  
26  
27  
28  
29  
30  
31  
32  
33  
34  
35  
36  
37  
38  
39  
40  
41  
42  
43  
44  
45  
46  
47  
48  
49  
50  
51  
52  
53  
54  
55  
56  
57  
58  
59  
60

## Reference

1. World Health Organization. Global Health Estimates: Deaths, disability-adjusted life year (DALYs), years of life lost (YLL) and years lost due to disability (YLD) by cause, age, and sex: 2000–2012, 2016.
2. Borghouts JA, Koes BW, Vondeling H, et al. Cost-of-illness of neck pain in The Netherlands in 1996. *Pain* 1999;80(3):629-36.
3. Fejer R, Kyvik KO, Hartvigsen J. The prevalence of neck pain in the world population: a systematic critical review of the literature. *European spine journal* 2006;15(6):834-48.
4. Manchikanti L, Singh V, Datta S, et al. Comprehensive review of epidemiology, scope, and impact of spinal pain. *Pain physician* 2009;12(4):E35-70.
5. Hoy D, Protani M, De R, et al. The epidemiology of neck pain. *Best Practice & Research Clinical Rheumatology* 2010;24(6):783-92.
6. Fine M. Quantifying the impact of NSAID-associated adverse events. *The American journal of managed care* 2013;19(14 Suppl):s267-72.
7. MacPherson H, Tilbrook H, Richmond S, et al. Alexander Technique Lessons or Acupuncture Sessions for Persons With Chronic Neck Pain: A Randomized Trial. *Annals of internal medicine* 2015;163(9):653-62.
8. Lee MS, Choi T-Y, Shin B-C, et al. Cupping for stroke rehabilitation: a systematic review. *Journal of the neurological sciences* 2010;294(1):70-73.
9. Lee MS, Choi T-Y, Shin B-C, et al. Cupping for hypertension: a systematic review. *Clinical and Experimental Hypertension* 2010;32(7):423-25.
10. Farhadi K, Schwebel DC, Saeb M, et al. The effectiveness of wet-cupping for nonspecific low back pain in Iran: a randomized controlled trial. *Complementary therapies in medicine* 2009;17(1):9-15.
11. Kim JD, Son MS. 2013 National health insurance statistical yearbook. Seoul: Health Insurance Review and Assessment Service and National Health Insurance Service, 2014.
12. Yuan Q-I, Guo T-m, Liu L, et al. Traditional Chinese medicine for neck pain and low back pain: a systematic review and meta-analysis. *PLoS One* 2015;10(2):e0117146.
13. Moher D, Shamseer L, Clarke M, et al. Preferred reporting items for systematic review and meta-analysis protocols (PRISMA-P) 2015 statement. *Systematic reviews* 2015;4(1):1.
14. Atkins D, Eccles M, Flottorp S, et al. Systems for grading the quality of evidence and the strength of recommendations I: critical appraisal of existing approaches The GRADE Working Group. *BMC health services research* 2004;4(1):38.
15. Cramer H, Lauche R, Hohmann C, et al. Randomized controlled trial of pulsating cupping (pneumatic pulsation therapy) for chronic neck pain. *Complementary Medicine Research* 2011;18(6):327-34.
16. Jin N, Wang B, Li G. Clinical observation of Yang's multiple tapping and cupping for the treatment of neck type cervical spondylosis. *Shanghai Journal of Traditional Chinese Medicine* 2014;48(8):59-60.
17. Kim T-H, Kang JW, Kim KH, et al. Cupping for treating neck pain in video display terminal (VDT) users: a randomized controlled pilot trial. *Journal of occupational health* 2012;54(6):416-26.
18. Lauche R, Materdey S, Cramer H, et al. Effectiveness of home-based cupping massage compared to progressive muscle relaxation in patients with chronic neck pain—a randomized controlled trial. *PLoS one* 2013;8(6):e65378.

19. Mou M-y, Piao S-a, Meng X-w, et al. Therapeutic efficacy observation on bloodletting and cupping for cervical radiculopathy. *Journal of Acupuncture and Tuina Science* 2015;13(4):236-41.
20. Yin J, Wang H. [Fifty-six cases of cervical spondylosis patients treated with wet cupping therapy (in Chinese)]. *Hubei journal of traditional chinese medicine* 2009;31(1):27-28.
21. Zhou H, Huang G, Li X, et al. [A hundred clinical cases of cervical spondylopathy patients treated with wet cupping using Zhuang-style lotus flower needle (in Chinese)]. *Journal of Sichuan of Traditional Chinese Medicine* 2014;32(12):142-43.
22. Chi L-M, Lin L-M, Chen C-L, et al. The effectiveness of cupping therapy on relieving chronic neck and shoulder pain: a randomized controlled trial. *Evidence-Based Complementary and Alternative Medicine* 2016;2016
23. Lauche R, Cramer H, Choi K-E, et al. The influence of a series of five dry cupping treatments on pain and mechanical thresholds in patients with chronic non-specific neck pain-a randomised controlled pilot study. *BMC complementary and alternative medicine* 2011;11(1):63.
24. Lauche R, Cramer H, Hohmann C, et al. The effect of traditional cupping on pain and mechanical thresholds in patients with chronic nonspecific neck pain: a randomised controlled pilot study. *Evidence-based complementary and alternative medicine* 2012;2012
25. Lee MS, Kim J-I, Kong JC, et al. Developing and validating a sham cupping device. *Acupuncture in Medicine* 2010;28(4):200-04.
26. Arslan M, Yaman G, Ilhan E, et al. Moving dry cupping therapy reduces upper shoulder and neck pain in office workers. *CLINICAL AND INVESTIGATIVE MEDICINE* 2015;38(4):E217-E20.
27. Al-Bedah AM, Shaban T, Suhaibani A, et al. Safety of Cupping Therapy in Studies Conducted in Twenty One Century: A Review of Literature. 2016
28. Kim S-Y, Koo S-J. Effect of duration of smartphone use on muscle fatigue and pain caused by forward head posture in adults. *Journal of physical therapy science* 2016;28(6):1669-72.
29. Chirali IZ. Traditional Chinese Medicine Cupping Therapy-E-Book: Elsevier Health Sciences 2014.
30. Turk J, Allen E. Bleeding and cupping. *Annals of the Royal College of Surgeons of England* 1983;65(2):128.
31. Li T, Li Y, Lin Y, et al. Significant and sustaining elevation of blood oxygen induced by Chinese cupping therapy as assessed by near-infrared spectroscopy. *Biomedical optics express* 2017;8(1):223-29.
32. Tagil SM, Celik HT, Ciftci S, et al. Wet-cupping removes oxidants and decreases oxidative stress. *Complementary therapies in medicine* 2014;22(6):1032-36.
33. Calvino B, Grilo RM. Central pain control. *Joint Bone Spine* 2006;73(1):10-16.
34. Al Bedah AM, Khalil MK, Posadzki P, et al. Evaluation of wet cupping therapy: systematic review of randomized clinical trials. *The Journal of Alternative and Complementary Medicine* 2016;22(10):768-77.
35. Saha FJ, Schumann S, Cramer H, et al. The effects of cupping massage in patients with chronic neck pain-a randomised controlled trial. *Complementary Medicine Research* 2017;24(1):26-32.

**Table 1.** Characteristics of the included studies

| Study ID                             | Country              | Disease                                                  | Number of participants | Age (years, mean±SD)                 | Methods of Intervention | Comparison                         | Cupping sites                                                                                                                                           | Number of cupping | Follow up period          | Relevant Outcomes (Primary/secondary) |
|--------------------------------------|----------------------|----------------------------------------------------------|------------------------|--------------------------------------|-------------------------|------------------------------------|---------------------------------------------------------------------------------------------------------------------------------------------------------|-------------------|---------------------------|---------------------------------------|
| <b>Cupping vs Control (Sole)</b>     |                      |                                                          |                        |                                      |                         |                                    |                                                                                                                                                         |                   |                           |                                       |
| <b>Vs waitlist (no intervention)</b> |                      |                                                          |                        |                                      |                         |                                    |                                                                                                                                                         |                   |                           |                                       |
| Arslan 2015                          | Turkey               | computer users diagnosed minimum 3 neck pain             | EG: 20, CG: 20         | EG: 26.0±3.5, CG: 26.0±3.8           | Dry cupping (moving)    | no intervention                    | upper shoulder and neck region                                                                                                                          | 10                | After treatment           | VAS                                   |
| Chi 2016                             | Taiwan               | work-related chronic neck shoulder pain                  | EG: 30, CG: 30         | EG: 43.6±6.3, CG: 42.5±5.8           | Dry cupping             | no intervention                    | SI15, GB21, LI15                                                                                                                                        | 1                 | After treatment           | VAS                                   |
| Lauche 2011                          | Germany              | chronic nonspecific neck pain                            | EG: 22, CG: 24         | EG: 26.1±4.2, CG: 25.1±3.0           | Dry cupping             | Waiting list control group         | descending and transverse parts of the trapezius muscle                                                                                                 | 5                 | After treatment           | VAS, NDI, SF-36                       |
| Lauche 2012                          | Germany              | chronic nonspecific neck pain                            | EG: 22, CG: 23         | EG: 54.8±3.2, CG: 29.3±2.9           | Wet cupping             | Waiting list control group         | descending parts of the trapezius muscle                                                                                                                | 1                 | Post-cupping after 3 days | VAS, NDI, SF-36                       |
| <b>Vs active control</b>             |                      |                                                          |                        |                                      |                         |                                    |                                                                                                                                                         |                   |                           |                                       |
| Liu 2016                             | China                | cervical spondylosis                                     | EG: 20, CG: 20         | NR                                   | Wet cupping             | Tuina                              | GV14, Ashi points                                                                                                                                       | 3                 | After treatment           | VAS, effective rate, tenderness       |
| Mou 2015                             | China (Multi center) | cervical radiculopathy                                   | EG: 68, CG: 56         | EG: 46.4±11.6, CG: 47.8±11.9         | Wet cupping             | MA                                 | GV14, GB21                                                                                                                                              | 4-12              | After treatment           | VAS, NDI, CAS                         |
| Yin 2009                             | China                | cervical spondylosis                                     | EG: 56, CG: 55         | EG: 32.13±7.87, CG: 35.24±6.67       | Wet cupping             | MA                                 | EX-B2, BL11, GB21, Ashi points                                                                                                                          | 10                | After treatment           | VAS, effective rate                   |
| Cramer 2011                          | Germany              | nonspecific neck pain for at least the previous 3 months | EG: 24, CG: 24         | EG: 44.46, CG: 47.88                 | Dry cupping             | Standard Medical Care              | Neck and shoulder lesion                                                                                                                                | 3-4               | After treatment           | VAS, NDI, SF-36                       |
| Kim 2012                             | Korea                | VDT workers with neck pain                               | EG: 20, CG: 20         | EG : 25.5 (median), CG : 28 (median) | Dry and wet cupping     | Heating pad group                  | GV14, GV16, GV15, GV12, GB20, GB21, LI17, SI11, SI12, SI13, SI14, SI15, BL10, BL11, BL12, BL13, BL14, BL15, BL16, BL17, BL41, BL42, BL43, BL44, EX-HN15 | 6                 | 7 weeks                   | NRS, NDI, EQ-5D                       |
| Lauche 2013                          | Germany              | chronic nonspecific neck pain                            | EG: 30, CG: 31         | EG: 54.5±12.3, CG: 53.7±13.4         | Dry cupping             | progressive muscle relaxation(PMR) | NR                                                                                                                                                      | 24                | 12 weeks                  | VAS, NDI, SF-36                       |



| Study ID                                              | Country             | Disease                        | Number of participants | Age (years, mean±SD)             | Methods of Intervention       | Comparison | Cupping sites                                     | Number of cupping | Follow up period | Relevant Outcomes (Primary/secondary) |
|-------------------------------------------------------|---------------------|--------------------------------|------------------------|----------------------------------|-------------------------------|------------|---------------------------------------------------|-------------------|------------------|---------------------------------------|
| Sui 2008*                                             | China               | cervical radiculopathy         | EG: 120, CG: 120       | NR                               | Dry cupping (moving)          | traction   | Acupoints at Bladder Meridian and Governor Vessel | 20                | After treatment  | VAS                                   |
| <b>Cupping with usual care vs usual care (Add-on)</b> |                     |                                |                        |                                  |                               |            |                                                   |                   |                  |                                       |
| <i>Dry cupping</i>                                    |                     |                                |                        |                                  |                               |            |                                                   |                   |                  |                                       |
| Cai 2015                                              | China               | Chronic neck pain              | EG: 60 CG: 60          | EG: 45.48±10.9<br>CG: 45.7±11.1  | Dry cupping                   | MA         | EX-B2                                             | 12                | After treatment  | SF-MPQ                                |
| Su 2016                                               | China               | Neck pain after sleeping       | EG:29 CG:29            | EG: 30.72±6.69<br>CG: 31.76±7.16 | Dry cupping                   | MA         | upper shoulder and neck region                    | 3                 | After treatment  | VAS, effective rate                   |
| Sui 2008*                                             | China               | cervical radiculopathy         | EG: 120, CG: 120       | NR                               | Dry cupping (moving)+traction | traction   | Acupoints at Bladder Meridian and Governor Vessel | 20                | After treatment  | VAS                                   |
| Yang 2011                                             | China               | cervical radiculopathy         | EG: 30<br>CG: 30       | NR                               | dry cupping+MA                | MA         | Ashi points, GV14, GB21, SI14, SI11, LI15         | 10                | After treatment  | VAS, effective rate                   |
| <i>Wet cupping</i>                                    |                     |                                |                        |                                  |                               |            |                                                   |                   |                  |                                       |
| Cheng 2012                                            | China               | cervical spondylosis           | EG: 30 CG: 30          | NR                               | wet cupping+EA                | EA         | Ashi points nearby GV14                           | 2-3               | After treatment  | VAS, effective rate                   |
| Jin 2014                                              | China               | neck type cervical spondylosis | EG: 33 CG: 33          | EG: 31.81±8.30<br>CG: 30.48±9.74 | wet cupping+MA                | MA         | upper shoulder and neck region                    | 5                 | After treatment  | VAS, NPQ, effective rate              |
| Mou 2015                                              | China (Multicenter) | cervical radiculopathy         | EG: 59, CG: 56         | EG: 45.4±11.6<br>CG: 47.8±11.9   | wet cupping+MA                | MA         | EX-B2, BL11, GB21, Ashi points                    | 10                | After treatment  | VAS, NDI, CAS                         |
| Zhou 2014                                             | China               | Cervical Spondylopathy         | EG:100 CG:100          | NR                               | Wet cupping+MA                | MA         | Ashi points, EX-B2, GB21                          | 10                | After treatment  | VAS , effective rate                  |

EG: experimental group, CG: control group, EA: electroacupuncture, MA: manual acupuncture, NR: not reported, VAS: Visual Analogue Scale, NDI: Neck Disability Index, EQ-5D: Euroqol5-D health utility, SF-36: 36-Item Short Form Health Survey, SF-MPQ: Short Form McGill Pain Questionnaire, NPQ: Neck Pain Questionnaire, CAS: Clinical assessment scale, VDT: Video Display Terminal, SD: Standard deviation

\*The study is a three-armed study, i.e. cupping group, control group, cupping plus control group.

**Table 2.** Meta-analysis of outcomes and level of evidence

| Variable                                              | Overall effect |              |          |                |          | Statistical method      | Studies (N) | Sample size (N) | Level of evidence |
|-------------------------------------------------------|----------------|--------------|----------|----------------|----------|-------------------------|-------------|-----------------|-------------------|
|                                                       | SMD            | 95% CI       | P        | I <sup>2</sup> | P        |                         |             |                 |                   |
| <b>Cupping versus Waitlist (Sole)</b>                 |                |              |          |                |          |                         |             |                 |                   |
| Pain (VAS)                                            | -1.57          | -2.41, -0.73 | 0.0002   | 84             | 0.0003   | Random Inverse Variance | 4           | 191             | Low               |
| Disability (NDI)                                      | -0.59          | -1.01, -0.17 | 0.005    | 0              | 0.32     | Random Inverse Variance | 2           | 91              | Low               |
| QoL (SF-36)                                           | 0.53           | 0.11, 0.95   | 0.01     | 0              | 0.99     | Random Inverse Variance | 2           | 91              | Low               |
| <b>Cupping versus Active control (Sole)</b>           |                |              |          |                |          |                         |             |                 |                   |
| Pain (VAS)                                            | -0.42          | -0.66, -0.18 | 0.0007   | 46             | 0.09     | Random Inverse Variance | 7           | 604             | Low               |
| Disability (NDI)                                      | -0.50          | -1.06, 0.06  | 0.08     | 75             | 0.007    | Random Inverse Variance | 4           | 213             | Very low          |
| QoL (SF-36)                                           | 0.61           | 0.15, 1.07   | 0.009    | 10<br>9        | 0.23     | Random Inverse Variance | 2           | 109             | Low               |
| <b>Cupping with active control vs control (addon)</b> |                |              |          |                |          |                         |             |                 |                   |
| Pain (VAS) with dry cupping                           | -0.61          | -0.79, -0.43 | <0.00001 | 0              | 0.92     | Random Inverse Variance | 4           | 478             | Low               |
| Pain (VAS) With wet cupping                           | -0.96          | -1.84, -0.08 | 0.03     | 93             | <0.00001 | Random Inverse Variance | 4           | 382             | Very low          |
| Disability (NDI)                                      | 0.25           | -0.28, 0.77  | 0.36     | -              | -        | Random Inverse Variance | 1           | 56              | Low               |

VAS: Visual analogue scale, NDI: Neck disability index, QoL: Quality of life, SMD: Standardized mean difference

**FIGURE LEGENDS**

**Figure 1.** PRISMA flow diagram of the literature search

**Figure 2.** Risk of bias in the included studies, as assessed using the Cochrane Collaboration's risk of bias tool

+: high risk of bias, ?: unclear risk of bias, -: low risk of bias

**Figure 3.** Forest plots demonstrating the effect of cupping as the sole intervention vs no treatment on neck pain

CI: confidence interval

**Figure 4.** Forest plots demonstrating the effect of cupping as the sole intervention vs active control on neck pain

CI: confidence interval

**Figure 5.** Forest plots demonstrating the effect of cupping as the add-on intervention on neck pain

CI: confidence interval

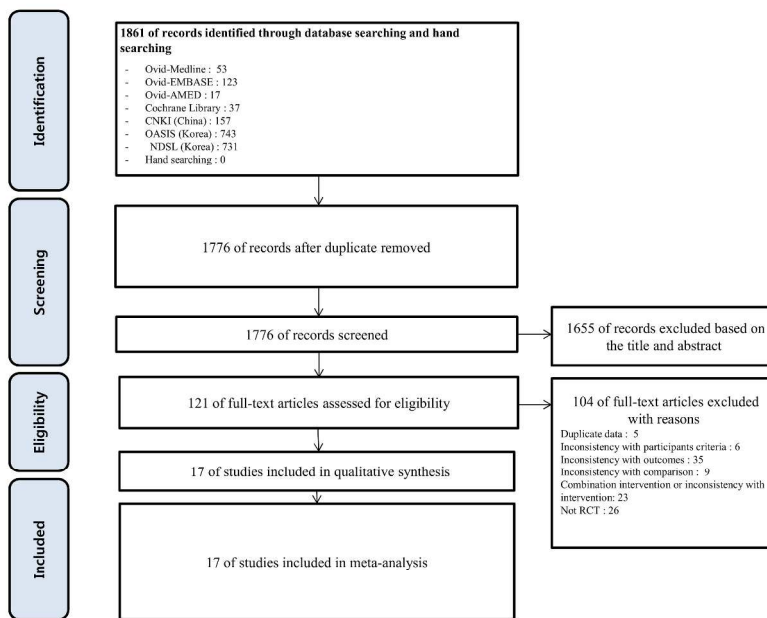

Figure 1. PRISMA flow diagram of the literature search

297x209mm (300 x 300 DPI)

|             | Random sequence generation (selection bias) | Allocation concealment (selection bias) | Blinding of participants and personnel (performance bias) | Blinding of outcome assessment (detection bias) | Incomplete outcome data (attrition bias) | Selective reporting (reporting bias) | Other bias |
|-------------|---------------------------------------------|-----------------------------------------|-----------------------------------------------------------|-------------------------------------------------|------------------------------------------|--------------------------------------|------------|
| Arslan2015  | ?                                           | ?                                       | -                                                         | -                                               | ?                                        | ?                                    | +          |
| Cai 2015    | ?                                           | ?                                       | -                                                         | -                                               | ?                                        | ?                                    | +          |
| Cheng 2012  | ?                                           | ?                                       | -                                                         | -                                               | ?                                        | ?                                    | +          |
| Chi 2016    | ?                                           | +                                       | -                                                         | -                                               | ?                                        | +                                    | +          |
| Cramer 2011 | +                                           | +                                       | -                                                         | -                                               | +                                        | +                                    | +          |
| Jin 2014    | +                                           | ?                                       | -                                                         | -                                               | ?                                        | ?                                    | +          |
| Kim 2012    | +                                           | +                                       | -                                                         | -                                               | +                                        | +                                    | +          |
| Lauche 2011 | ?                                           | +                                       | -                                                         | -                                               | +                                        | +                                    | +          |
| Lauche 2012 | ?                                           | +                                       | -                                                         | -                                               | +                                        | +                                    | +          |
| Lauche 2013 | +                                           | +                                       | -                                                         | -                                               | +                                        | +                                    | +          |
| Liu 2016    | ?                                           | ?                                       | -                                                         | -                                               | ?                                        | ?                                    | +          |
| Mou 2015    | +                                           | +                                       | -                                                         | -                                               | ?                                        | ?                                    | +          |
| Su 2016     | ?                                           | ?                                       | -                                                         | -                                               | ?                                        | ?                                    | +          |
| Sui 2008    | ?                                           | ?                                       | -                                                         | -                                               | ?                                        | ?                                    | +          |
| Yang 2011   | ?                                           | ?                                       | -                                                         | -                                               | ?                                        | ?                                    | +          |
| Yin 2009    | +                                           | ?                                       | -                                                         | -                                               | ?                                        | +                                    | +          |
| Zhou 2014   | +                                           | +                                       | -                                                         | -                                               | ?                                        | ?                                    | +          |

Figure 2. Risk of bias in the included studies, as assessed using the Cochrane Collaboration's risk of bias tool  
 +: high risk of bias, ?: unclear risk of bias, -: low risk of bias

266x738mm (300 x 300 DPI)

1) Pain

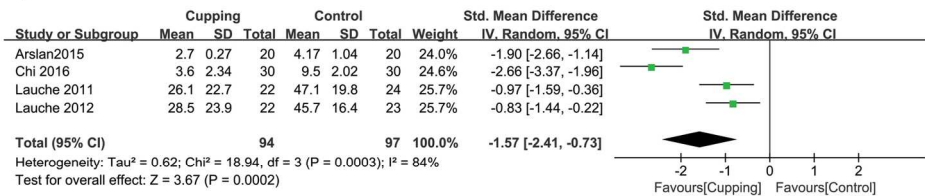

2) Disability

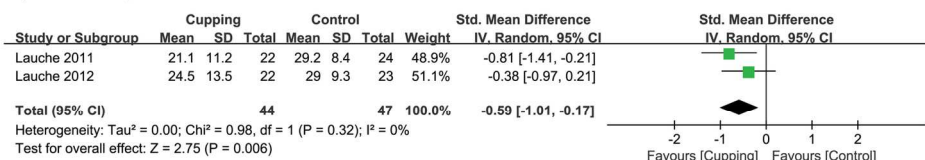

3) Quality of life

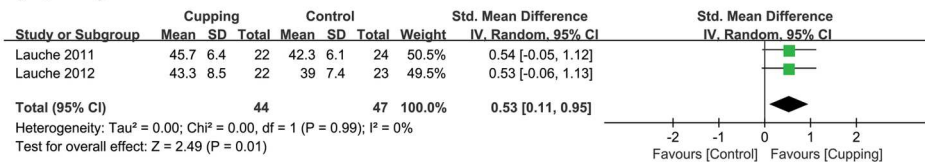

Figure 3. Forest plots demonstrating the effect of cupping as the sole intervention vs no treatment on neck pain

CI: confidence interval

151x109mm (300 x 300 DPI)

## 1) Pain

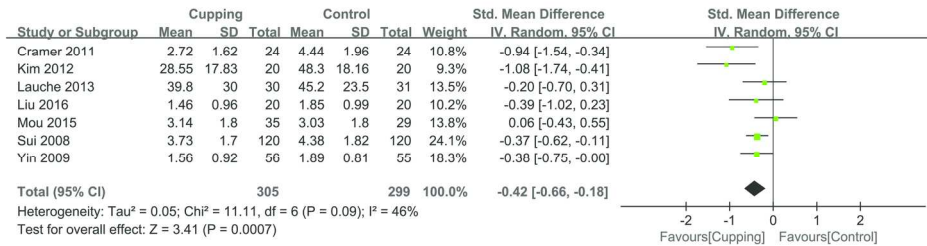

## 2) Disability

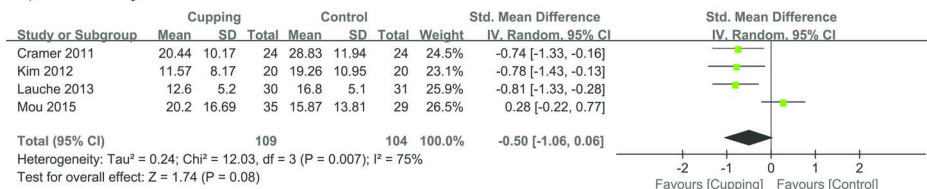

## 3) Quality of life

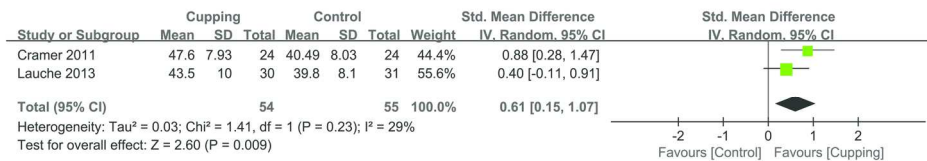

Figure 4. Forest plots demonstrating the effect of cupping as the sole intervention vs active control on neck pain

CI: confidence interval

173x143mm (300 x 300 DPI)

1) Pain

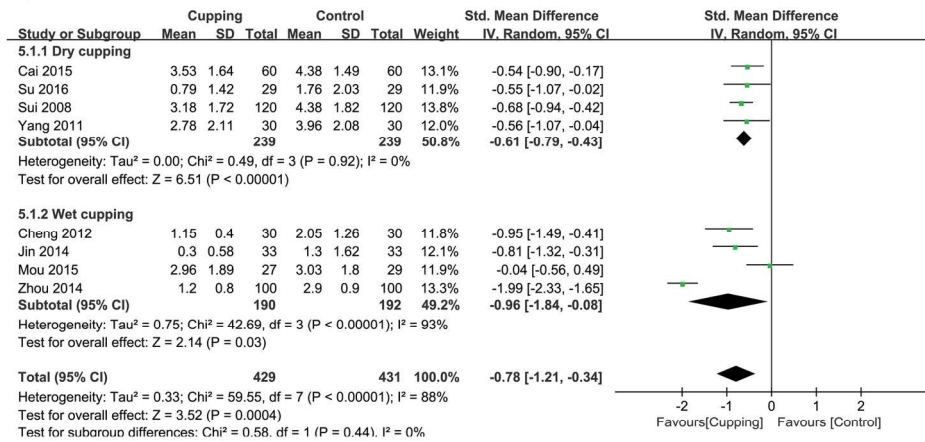

2) Disability

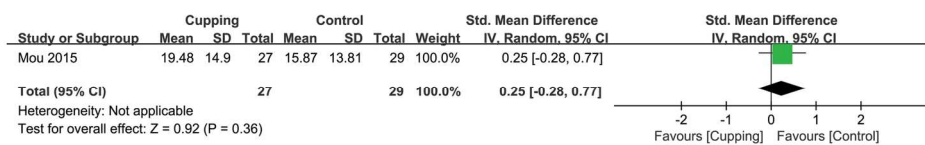

Figure 5. Forest plots demonstrating the effect of cupping as the add-on intervention on neck pain  
CI: confidence interval

158x118mm (300 x 300 DPI)



## Appendix 1. Search strategy

| Ovid MEDLINE(R) 1946 to July Week 2 2016 |                                                                    | Date : July 21. 2016 |
|------------------------------------------|--------------------------------------------------------------------|----------------------|
| Searches                                 |                                                                    | Results              |
| <b>1</b>                                 | Neck Pain/                                                         | 5341                 |
| <b>2</b>                                 | exp Brachial Plexus Neuropathies/                                  | 3293                 |
| <b>3</b>                                 | cervical pain.mp.                                                  | 696                  |
| <b>4</b>                                 | neckache.mp.                                                       | 14                   |
| <b>5</b>                                 | cervicodynia.mp.                                                   | 9                    |
| <b>6</b>                                 | cervicalgia.mp.                                                    | 78                   |
| <b>7</b>                                 | brachialgia.mp.                                                    | 156                  |
| <b>8</b>                                 | brachial neuritis.mp.                                              | 136                  |
| <b>9</b>                                 | brachial neuralgia.mp.                                             | 113                  |
| <b>10</b>                                | neck pain.mp.                                                      | 8419                 |
| <b>11</b>                                | neck injur*.mp.                                                    | 5039                 |
| <b>12</b>                                | brachial plexus neuropath*.mp.                                     | 2057                 |
| <b>13</b>                                | brachial plexus neuritis.mp.                                       | 1420                 |
| <b>14</b>                                | thoracic outlet syndrome/ or cervical rib syndrome/                | 2063                 |
| <b>15</b>                                | Torticollis/                                                       | 3295                 |
| <b>16</b>                                | exp brachial plexus neuropathies/ or exp brachial plexus neuritis/ | 3293                 |
| <b>17</b>                                | cervico brachial neuralgia.ti,ab.                                  | 41                   |
| <b>18</b>                                | cervicobrachial neuralgia.ti,ab.                                   | 63                   |
| <b>19</b>                                | (monoradicul* or monoradicl*).tw.                                  | 123                  |
| <b>20</b>                                | or/1-19                                                            | 22501                |
| <b>21</b>                                | neck/                                                              | 26649                |
| <b>22</b>                                | neck muscles/                                                      | 5273                 |
| <b>23</b>                                | exp cervical plexus/                                               | 7338                 |
| <b>24</b>                                | exp cervical vertebrae/                                            | 34135                |
| <b>25</b>                                | atlanto-axial joint/                                               | 2735                 |
| <b>26</b>                                | atlanto-occipital joint/                                           | 1519                 |
| <b>27</b>                                | Cervical Atlas/                                                    | 2356                 |
| <b>28</b>                                | spinal nerve roots/                                                | 9829                 |
| <b>29</b>                                | exp brachial plexus/                                               | 22673                |
| <b>30</b>                                | (odontoid* or cervical or occip* or atlant*).tw.                   | 218433               |
| <b>31</b>                                | axis/ or odontoid process/                                         | 1567                 |

|           |                                                                                             |         |
|-----------|---------------------------------------------------------------------------------------------|---------|
| <b>32</b> | Thoracic Vertebrae/                                                                         | 17626   |
| <b>33</b> | cervical vertebrae.mp.                                                                      | 31224   |
| <b>34</b> | cervical plexus.mp.                                                                         | 1269    |
| <b>35</b> | cervical spine.mp.                                                                          | 16170   |
| <b>36</b> | (neck adj3 muscles).mp.                                                                     | 6243    |
| <b>37</b> | (brachial adj3 plexus).mp.                                                                  | 12284   |
| <b>38</b> | (thoracic adj3 vertebrae).mp.                                                               | 18287   |
| <b>39</b> | neck.mp.                                                                                    | 189378  |
| <b>40</b> | (thoracic adj3 spine).mp.                                                                   | 5119    |
| <b>41</b> | (thoracic adj3 outlet).mp.                                                                  | 2364    |
| <b>42</b> | trapezius.mp.                                                                               | 2799    |
| <b>43</b> | or/21-42                                                                                    | 445033  |
| <b>44</b> | exp pain/                                                                                   | 335410  |
| <b>45</b> | exp injuries/                                                                               | 792763  |
| <b>46</b> | pain.mp.                                                                                    | 507456  |
| <b>47</b> | ache.mp.                                                                                    | 11686   |
| <b>48</b> | sore.mp.                                                                                    | 5787    |
| <b>49</b> | stiff.mp.                                                                                   | 6463    |
| <b>50</b> | discomfort.mp.                                                                              | 31068   |
| <b>51</b> | injur*.mp.                                                                                  | 838096  |
| <b>52</b> | neuropath*.mp.                                                                              | 107269  |
| <b>53</b> | or/44-52                                                                                    | 1807004 |
| <b>54</b> | 43 and 53                                                                                   | 110046  |
| <b>55</b> | Radiculopathy/                                                                              | 4242    |
| <b>56</b> | exp temporomandibular joint disorders/ or exp temporomandibular joint dysfunction syndrome/ | 15244   |
| <b>57</b> | myofascial pain syndromes/                                                                  | 1358    |
| <b>58</b> | exp "Sprains and Strains"/                                                                  | 16868   |
| <b>59</b> | exp Spinal Osteophytosis/                                                                   | 3865    |
| <b>60</b> | exp Neuritis/                                                                               | 6804    |
| <b>61</b> | Polyradiculopathy/                                                                          | 2472    |
| <b>62</b> | exp Arthritis/                                                                              | 225889  |
| <b>63</b> | Fibromyalgia/                                                                               | 7136    |
| <b>64</b> | spondylitis/ or discitis/                                                                   | 5978    |
| <b>65</b> | spondylosis/ or spondylolysis/ or spondylolisthesis/                                        | 6193    |
| <b>66</b> | radiculopathy.mp.                                                                           | 6615    |
| <b>67</b> | radiculitis.mp.                                                                             | 709     |

|    |            |                                                                              |
|----|------------|------------------------------------------------------------------------------|
| 1  |            |                                                                              |
| 2  |            |                                                                              |
| 3  |            |                                                                              |
| 4  | <b>68</b>  | temporomandibular.mp. 23695                                                  |
| 5  | <b>69</b>  | myofascial pain syndrome*.mp. 1513                                           |
| 6  | <b>70</b>  | thoracic outlet syndrome*.mp. 2200                                           |
| 7  | <b>71</b>  | spinal osteophytosis.mp. 3349                                                |
| 8  | <b>72</b>  | neuritis.mp. 14620                                                           |
| 9  | <b>73</b>  | spondylosis.mp. 3480                                                         |
| 10 | <b>74</b>  | spondylitis.mp. 19102                                                        |
| 11 | <b>75</b>  | spondylolisthesis.mp. 5006                                                   |
| 12 | <b>76</b>  | or/55-75 311063                                                              |
| 13 | <b>77</b>  | 43 and 76 24187                                                              |
| 14 | <b>78</b>  | exp neck/ 26656                                                              |
| 15 | <b>79</b>  | exp cervical vertebrae/ 34135                                                |
| 16 | <b>80</b>  | Thoracic Vertebrae/ 17626                                                    |
| 17 | <b>81</b>  | neck.mp. 189378                                                              |
| 18 | <b>82</b>  | (thoracic adj3 vertebrae).mp. 18287                                          |
| 19 | <b>83</b>  | (thoracic adj3 spine).mp. 5119                                               |
| 20 | <b>84</b>  | cervical spine.mp. 16170                                                     |
| 21 | <b>85</b>  | 78 or 79 or 80 or 81 or 82 or 83 or 84 237596                                |
| 22 | <b>86</b>  | Intervertebral Disk/ 12624                                                   |
| 23 | <b>87</b>  | (disc or discs).mp. 78491                                                    |
| 24 | <b>88</b>  | (disk or disks).mp. 39655                                                    |
| 25 | <b>89</b>  | 86 or 87 or 88 105850                                                        |
| 26 | <b>90</b>  | 85 and 89 7657                                                               |
| 27 | <b>91</b>  | herniat*.mp. 16266                                                           |
| 28 | <b>92</b>  | slipped.mp. 3701                                                             |
| 29 | <b>93</b>  | prolapse*.mp. 25552                                                          |
| 30 | <b>94</b>  | displace*.mp. 113739                                                         |
| 31 | <b>95</b>  | degenerat*.mp. 184631                                                        |
| 32 | <b>96</b>  | (bulge or bulged or bulging).mp. 7023                                        |
| 33 | <b>97</b>  | or/91-96 335815                                                              |
| 34 | <b>98</b>  | 90 and 97 4888                                                               |
| 35 | <b>99</b>  | intervertebral disk degeneration/ or intervertebral disk displacement/ 19139 |
| 36 | <b>100</b> | intervertebral disk displacement.mp. 1714                                    |
| 37 | <b>101</b> | intervertebral disc displacement.mp. 17001                                   |
| 38 | <b>102</b> | intervertebral disk degeneration.mp. 98                                      |
| 39 | <b>103</b> | intervertebral disc degeneration.mp. 3296                                    |
| 40 | <b>104</b> | or/99-103 19468                                                              |
| 41 |            |                                                                              |
| 42 |            |                                                                              |
| 43 |            |                                                                              |
| 44 |            |                                                                              |
| 45 |            |                                                                              |
| 46 |            |                                                                              |
| 47 |            |                                                                              |
| 48 |            |                                                                              |
| 49 |            |                                                                              |
| 50 |            |                                                                              |
| 51 |            |                                                                              |
| 52 |            |                                                                              |
| 53 |            |                                                                              |
| 54 |            |                                                                              |
| 55 |            |                                                                              |
| 56 |            |                                                                              |
| 57 |            |                                                                              |
| 58 |            |                                                                              |
| 59 |            |                                                                              |
| 60 |            |                                                                              |

|            |                                                      |        |
|------------|------------------------------------------------------|--------|
| <b>105</b> | 85 and 104                                           | 3566   |
| <b>106</b> | 20 or 54 or 77 or 98 or 105                          | 124557 |
| <b>107</b> | cupping.mp.                                          | 1298   |
| <b>108</b> | ventouse.tw.                                         | 182    |
| <b>109</b> | exp Bloodletting/                                    | 2596   |
| <b>110</b> | bloodletting.mp.                                     | 2776   |
| <b>111</b> | blood letting.mp.                                    | 302    |
| <b>112</b> | blood-letting.mp.                                    | 302    |
| <b>113</b> | spilled blood.mp.                                    | 10     |
| <b>114</b> | venesection.mp.                                      | 569    |
| <b>115</b> | 107 or 108 or 109 or 110 or 111 or 112 or 113 or 114 | 4788   |
| <b>116</b> | 106 and 115                                          | 53     |

| <b>Ovid EMBASE 1980 to 2016 July 21</b> |                                                                    | <b>Date : July 22, 2016</b> |
|-----------------------------------------|--------------------------------------------------------------------|-----------------------------|
|                                         | <b>Searches</b>                                                    | <b>Results</b>              |
| <b>1</b>                                | Neck Pain/                                                         | 16361                       |
| <b>2</b>                                | brachial plexus neuropathy/                                        | 1638                        |
| <b>3</b>                                | cervical pain.mp.                                                  | 1194                        |
| <b>4</b>                                | neckache.mp.                                                       | 24                          |
| <b>5</b>                                | cervicodynia.mp.                                                   | 18                          |
| <b>6</b>                                | cervicalgia.mp.                                                    | 158                         |
| <b>7</b>                                | brachialgia/                                                       | 252                         |
| <b>8</b>                                | brachialgia.mp.                                                    | 380                         |
| <b>9</b>                                | brachial neuritis.mp.                                              | 197                         |
| <b>10</b>                               | brachial neuralgia.mp.                                             | 72                          |
| <b>11</b>                               | neck pain.mp.                                                      | 18504                       |
| <b>12</b>                               | neck injur*.mp.                                                    | 6901                        |
| <b>13</b>                               | brachial plexus neuropath*.mp.                                     | 1887                        |
| <b>14</b>                               | brachial plexus neuritis.mp.                                       | 95                          |
| <b>15</b>                               | thoracic outlet syndrome/                                          | 1953                        |
| <b>16</b>                               | Torticollis/                                                       | 4007                        |
| <b>17</b>                               | exp brachial plexus neuropathies/ or exp brachial plexus neuritis/ | 1638                        |
| <b>18</b>                               | cervico brachial neuralgia.ti,ab.                                  | 43                          |
| <b>19</b>                               | cervicobrachial neuralgia.ti,ab.                                   | 82                          |
| <b>20</b>                               | (monoradicul* or monoradicl*).tw.                                  | 139                         |
| <b>21</b>                               | or/1-20                                                            | 33843                       |

|    |           |                                                         |
|----|-----------|---------------------------------------------------------|
| 1  |           |                                                         |
| 2  |           |                                                         |
| 3  |           |                                                         |
| 4  | <b>22</b> | neck/ 44189                                             |
| 5  | <b>23</b> | neck muscles/ 4905                                      |
| 6  | <b>24</b> | cervical plexus/ 1099                                   |
| 7  | <b>25</b> | cervical spine/ 30009                                   |
| 8  | <b>26</b> | atlantoaxial joint/ 1640                                |
| 9  | <b>27</b> | atlantooccipital joint/ 2036                            |
| 10 | <b>28</b> | atlas/ 1842                                             |
| 11 | <b>29</b> | spinal root/ 4476                                       |
| 12 | <b>30</b> | brachial plexus/ 7512                                   |
| 13 | <b>31</b> | (odontoid* or cervical or occip* or atlant*).tw. 287940 |
| 14 | <b>32</b> | odontoid process/ 2216                                  |
| 15 | <b>33</b> | cervical vertebra.mp. 2342                              |
| 16 | <b>34</b> | cervical vertebrae.mp. 2846                             |
| 17 | <b>35</b> | cervical plexus.mp. 1355                                |
| 18 | <b>36</b> | cervical spine.mp. 45628                                |
| 19 | <b>37</b> | (neck adj3 muscles).mp. 2411                            |
| 20 | <b>38</b> | (brachial adj3 plexus).mp. 16727                        |
| 21 | <b>39</b> | (thoracic adj3 vertebrae).mp. 1961                      |
| 22 | <b>40</b> | neck.mp. 273953                                         |
| 23 | <b>41</b> | (thoracic adj3 spine).mp. 12633                         |
| 24 | <b>42</b> | (thoracic adj3 outlet).mp. 2309                         |
| 25 | <b>43</b> | trapezius.mp. 4700                                      |
| 26 | <b>44</b> | or/22-43 571079                                         |
| 27 | <b>45</b> | exp pain/ 980950                                        |
| 28 | <b>46</b> | exp injuries/ 1694977                                   |
| 29 | <b>47</b> | pain.mp. 926638                                         |
| 30 | <b>48</b> | ache.mp. 15335                                          |
| 31 | <b>49</b> | sore.mp. 16755                                          |
| 32 | <b>50</b> | stiff.mp. 10024                                         |
| 33 | <b>51</b> | discomfort.mp. 57435                                    |
| 34 | <b>52</b> | injur*.mp. 1289699                                      |
| 35 | <b>53</b> | neuropath*.mp. 245028                                   |
| 36 | <b>54</b> | or/45-53 3161489                                        |
| 37 | <b>55</b> | 44 and 54 171039                                        |
| 38 | <b>56</b> | Radiculopathy/ 8123                                     |
| 39 | <b>57</b> | temporomandibular joint disorder/ 11500                 |
| 40 | <b>58</b> | myofascial pain/ 6940                                   |
| 41 |           |                                                         |
| 42 |           |                                                         |
| 43 |           |                                                         |
| 44 |           |                                                         |
| 45 |           |                                                         |
| 46 |           |                                                         |
| 47 |           |                                                         |
| 48 |           |                                                         |
| 49 |           |                                                         |
| 50 |           |                                                         |
| 51 |           |                                                         |
| 52 |           |                                                         |
| 53 |           |                                                         |
| 54 |           |                                                         |
| 55 |           |                                                         |
| 56 |           |                                                         |
| 57 |           |                                                         |
| 58 |           |                                                         |
| 59 |           |                                                         |
| 60 |           |                                                         |

|    |                                       |        |
|----|---------------------------------------|--------|
| 59 | spondylosis/ or cervical spondylosis/ | 6531   |
| 60 | Neuritis/                             | 6092   |
| 61 | exp Arthritis/                        | 381726 |
| 62 | Fibromyalgia/                         | 15823  |
| 63 | exp spondylitis/                      | 32769  |
| 64 | diskitis/                             | 1914   |
| 65 | spondylolisthesis/                    | 6558   |
| 66 | radiculopathy.mp.                     | 10970  |
| 67 | radiculitis.mp.                       | 1246   |
| 68 | temporomandibular.mp.                 | 24975  |
| 69 | myofascial pain syndrome*.mp.         | 1068   |
| 70 | spinal osteophytosis.mp.              | 63     |
| 71 | neuritis.mp.                          | 18454  |
| 72 | spondylosis.mp.                       | 7663   |
| 73 | spondylitis.mp.                       | 33467  |
| 74 | spondylolisthesis.mp.                 | 7282   |
| 75 | or/56-74                              | 457219 |
| 76 | 44 and 75                             | 25812  |
| 77 | neck/                                 | 44189  |
| 78 | cervical spine/                       | 30009  |
| 79 | neck.mp.                              | 273953 |
| 80 | (thoracic adj3 vertebrae).mp.         | 1961   |
| 81 | (thoracic adj3 spine).mp.             | 12633  |
| 82 | cervical spine.mp.                    | 45628  |
| 83 | or/77-82                              | 319795 |
| 84 | Intervertebral Disk/                  | 10857  |
| 85 | (disc or discs).mp.                   | 76993  |
| 86 | (disk or disks).mp.                   | 89287  |
| 87 | or/84-86                              | 134067 |
| 88 | 83 and 87                             | 8827   |
| 89 | herniat*.mp.                          | 22785  |
| 90 | slipped.mp.                           | 3494   |
| 91 | prolapse*.mp.                         | 39404  |
| 92 | displace*.mp.                         | 119055 |
| 93 | degenerat*.mp.                        | 290515 |
| 94 | (bulge or bulged or bulging).mp.      | 9633   |
| 95 | or/89-94                              | 475220 |

|            |                                                      |        |
|------------|------------------------------------------------------|--------|
| <b>96</b>  | 88 and 95                                            | 4658   |
| <b>97</b>  | intervertebral disk hernia/                          | 15184  |
| <b>98</b>  | intervertebral disk degeneration/                    | 7340   |
| <b>99</b>  | intervertebral disk displacement.mp.                 | 1030   |
| <b>100</b> | intervertebral disc displacement.mp.                 | 494    |
| <b>101</b> | intervertebral disk degeneration.mp.                 | 7386   |
| <b>102</b> | intervertebral disc degeneration.mp.                 | 1643   |
| <b>103</b> | or/97-102                                            | 22767  |
| <b>104</b> | 83 and 103                                           | 3864   |
| <b>105</b> | 21 or 55 or 76 or 96 or 104                          | 184666 |
| <b>106</b> | cupping.mp.                                          | 1702   |
| <b>107</b> | ventouse.tw.                                         | 396    |
| <b>108</b> | exp phlebotomy/                                      | 8690   |
| <b>109</b> | bloodletting.mp.                                     | 627    |
| <b>110</b> | blood letting.mp.                                    | 335    |
| <b>111</b> | bloodletting.mp.                                     | 627    |
| <b>112</b> | spilled blood.mp.                                    | 13     |
| <b>113</b> | venesection.mp.                                      | 699    |
| <b>114</b> | 106 or 107 or 108 or 109 or 110 or 111 or 112 or 113 | 11385  |
| <b>115</b> | 105 and 114                                          | 123    |

| <b>Ovid AMED (Allied and Complementary Medicine) 1985 to July 2016</b> |                                | <b>Date : July. 22. 2016</b> |
|------------------------------------------------------------------------|--------------------------------|------------------------------|
| Searches                                                               |                                | Results                      |
| <b>1</b>                                                               | Neck Pain/                     | 983                          |
| <b>2</b>                                                               | exp Brachial plexus/           | 282                          |
| <b>3</b>                                                               | cervical pain.mp.              | 74                           |
| <b>4</b>                                                               | neckache.mp.                   | 0                            |
| <b>5</b>                                                               | cervicodynia.mp.               | 2                            |
| <b>6</b>                                                               | cervicalgia.mp.                | 13                           |
| <b>7</b>                                                               | brachialgia.mp.                | 6                            |
| <b>8</b>                                                               | brachial neuritis.mp.          | 1                            |
| <b>9</b>                                                               | brachial neuralgia.mp.         | 5                            |
| <b>10</b>                                                              | neck pain.mp.                  | 1327                         |
| <b>11</b>                                                              | neck injur*.mp.                | 134                          |
| <b>12</b>                                                              | brachial plexus neuropath*.mp. | 8                            |
| <b>13</b>                                                              | brachial plexus neuritis.mp.   | 1                            |

|    |                                                     |       |
|----|-----------------------------------------------------|-------|
| 14 | thoracic outlet syndrome/ or cervical rib syndrome/ | 43    |
| 15 | Torticollis/                                        | 68    |
| 16 | cervico brachial neuralgia.ti,ab.                   | 0     |
| 17 | cervicobrachial neuralgia.ti,ab.                    | 2     |
| 18 | (monoradicul* or monoradicl*).tw.                   | 0     |
| 19 | or/1-18                                             | 1875  |
| 20 | neck/                                               | 653   |
| 21 | neck muscles/                                       | 137   |
| 22 | exp cervical plexus/                                | 30    |
| 23 | exp cervical vertebrae/                             | 1618  |
| 24 | Atlanto axial joint/                                | 32    |
| 25 | Atlanto occipital joint/                            | 17    |
| 26 | spinal nerve roots/                                 | 90    |
| 27 | (odontoid* or cervical or occip* or atlant*).tw.    | 3845  |
| 28 | Axis/                                               | 8     |
| 29 | Odontoid process/                                   | 8     |
| 30 | Thoracic Vertebrae/                                 | 293   |
| 31 | cervical vertebrae.mp.                              | 1650  |
| 32 | cervical plexus.mp.                                 | 11    |
| 33 | cervical spine.mp.                                  | 1152  |
| 34 | (neck adj3 muscles).mp.                             | 295   |
| 35 | (brachial adj3 plexus).mp.                          | 200   |
| 36 | (thoracic adj3 vertebrae).mp.                       | 322   |
| 37 | neck.mp.                                            | 3669  |
| 38 | (thoracic adj3 spine).mp.                           | 350   |
| 39 | (thoracic adj3 outlet).mp.                          | 83    |
| 40 | trapezius.mp.                                       | 491   |
| 41 | or/20-40                                            | 7438  |
| 42 | exp pain/                                           | 19753 |
| 43 | exp injuries/                                       | 2719  |
| 44 | pain.mp.                                            | 28582 |
| 45 | ache.mp.                                            | 113   |
| 46 | sore.mp.                                            | 163   |
| 47 | stiff.mp.                                           | 218   |
| 48 | discomfort.mp.                                      | 969   |
| 49 | injur*.mp.                                          | 27054 |
| 50 | neuropath*.mp.                                      | 1728  |



|           |                                                      |       |
|-----------|------------------------------------------------------|-------|
| <b>51</b> | or/42-50                                             | 55282 |
| <b>52</b> | 41 and 51                                            | 3984  |
| <b>53</b> | myofascial pain syndromes/                           | 330   |
| <b>54</b> | exp "Sprains and Strains"/                           | 902   |
| <b>55</b> | exp Spinal Osteophytosis/                            | 35    |
| <b>56</b> | exp Neuritis/                                        | 61    |
| <b>57</b> | exp Arthritis/                                       | 5226  |
| <b>58</b> | Fibromyalgia/                                        | 1612  |
| <b>59</b> | spondylitis/ or discitis/                            | 72    |
| <b>60</b> | spondylosis/ or spondylolysis/ or spondylolisthesis/ | 139   |
| <b>61</b> | radiculopathy.mp.                                    | 282   |
| <b>62</b> | radiculitis.mp.                                      | 10    |
| <b>63</b> | temporomandibular.mp.                                | 551   |
| <b>64</b> | myofascial pain syndrome*.mp.                        | 402   |
| <b>65</b> | thoracic outlet syndrome*.mp.                        | 80    |
| <b>66</b> | spinal osteophytosis.mp.                             | 41    |
| <b>67</b> | neuritis.mp.                                         | 75    |
| <b>68</b> | spondylosis.mp.                                      | 129   |
| <b>69</b> | spondylitis.mp.                                      | 346   |
| <b>70</b> | spondylolisthesis.mp.                                | 153   |
| <b>71</b> | or/53-70                                             | 9340  |
| <b>72</b> | 41 and 71                                            | 781   |
| <b>73</b> | exp neck/                                            | 697   |
| <b>74</b> | exp cervical vertebrae/                              | 1618  |
| <b>75</b> | Thoracic Vertebrae/                                  | 293   |
| <b>76</b> | neck.mp.                                             | 3669  |
| <b>77</b> | (thoracic adj3 vertebrae).mp.                        | 322   |
| <b>78</b> | (thoracic adj3 spine).mp.                            | 350   |
| <b>79</b> | cervical spine.mp.                                   | 1152  |
| <b>80</b> | 73 or 74 or 75 or 76 or 77 or 78 or 79               | 5606  |
| <b>81</b> | Intervertebral Disk/                                 | 325   |
| <b>82</b> | (disc or discs).mp.                                  | 1189  |
| <b>83</b> | (disk or disks).mp.                                  | 972   |
| <b>84</b> | 81 or 82 or 83                                       | 1665  |
| <b>85</b> | 80 and 84                                            | 224   |
| <b>86</b> | herniat*.mp.                                         | 384   |
| <b>87</b> | slipped.mp.                                          | 27    |

|            |                                                                        |      |
|------------|------------------------------------------------------------------------|------|
| <b>88</b>  | prolapse*.mp.                                                          | 120  |
| <b>89</b>  | displace*.mp.                                                          | 2488 |
| <b>90</b>  | degenerat*.mp.                                                         | 1631 |
| <b>91</b>  | (bulge or bulged or bulging).mp.                                       | 63   |
| <b>92</b>  | or/86-91                                                               | 4359 |
| <b>93</b>  | 85 and 92                                                              | 140  |
| <b>94</b>  | intervertebral disk degeneration/ or intervertebral disk displacement/ | 333  |
| <b>95</b>  | intervertebral disk displacement.mp.                                   | 370  |
| <b>96</b>  | intervertebral disc displacement.mp.                                   | 1    |
| <b>97</b>  | intervertebral disk degeneration.mp.                                   | 25   |
| <b>98</b>  | intervertebral disc degeneration.mp.                                   | 20   |
| <b>99</b>  | 94 or 95 or 96 or 97 or 98                                             | 404  |
| <b>100</b> | 80 and 99                                                              | 54   |
| <b>101</b> | 19 or 52 or 72 or 93 or 100                                            | 4612 |
| <b>102</b> | cupping.mp.                                                            | 161  |
| <b>103</b> | ventouse.tw.                                                           | 2    |
| <b>104</b> | exp Bloodletting/                                                      | 43   |
| <b>105</b> | exp Cupping/                                                           | 91   |
| <b>106</b> | bloodletting.mp.                                                       | 68   |
| <b>107</b> | blood letting.mp.                                                      | 29   |
| <b>108</b> | bloodletting.mp.                                                       | 68   |
| <b>109</b> | spilled blood.mp.                                                      | 0    |
| <b>110</b> | venesection.mp.                                                        | 0    |
| <b>111</b> | 102 or 103 or 104 or 105 or 106 or 107 or 108 or 109 or 110            | 221  |
| <b>112</b> | 101 and 111                                                            | 17   |

| Cochrane Central Register of Controlled Trials : July 2016 |         | Date : July. 22. 2016 |
|------------------------------------------------------------|---------|-----------------------|
| Searches                                                   | Results |                       |
| <b>1</b> [mh ^"Neck pain"]                                 | 719     |                       |
| <b>2</b> [mh "Brachial Plexus Neuropathies"]               | 50      |                       |
| <b>3</b> cervical pain:ti,ab,kw                            | 2541    |                       |
| <b>4</b> neckache:ti,ab,kw                                 | 1       |                       |
| <b>5</b> cervicodynia:ti,ab,kw                             | 1       |                       |
| <b>6</b> cervicalgia:ti,ab,kw                              | 7       |                       |
| <b>7</b> brachialgia:ti,ab,kw                              | 9       |                       |
| <b>8</b> brachial neuritis:ti,ab,kw                        | 27      |                       |

|    |           |                                                                                 |
|----|-----------|---------------------------------------------------------------------------------|
| 1  |           |                                                                                 |
| 2  |           |                                                                                 |
| 3  |           |                                                                                 |
| 4  | <b>9</b>  | brachial neuralgia:ti,ab,kw 15                                                  |
| 5  | <b>10</b> | neck pain:ti,ab,kw 3706                                                         |
| 6  | <b>11</b> | neck injur*:ti,ab,kw 1082                                                       |
| 7  | <b>12</b> | brachial plexus neuropath*:ti,ab,kw 49                                          |
| 8  | <b>13</b> | brachial plexus neuritis:ti,ab,kw 27                                            |
| 9  | <b>14</b> | [mh ^"thoracic outlet syndrome"] 17                                             |
| 10 | <b>15</b> | [mh ^"cervical rib syndrome"] 1                                                 |
| 11 | <b>16</b> | [mh ^Torticollis] 90                                                            |
| 12 | <b>17</b> | [mh "brachial plexus neuropathies"] 50                                          |
| 13 | <b>18</b> | [mh "brachial plexus neuritis"] 25                                              |
| 14 | <b>19</b> | cervico brachial neuralgia:ti,ab,kw 3                                           |
| 15 | <b>20</b> | cervicobrachial neuralgia:ti,ab,kw 58                                           |
| 16 | <b>21</b> | monoradicul* or monoradicl*:ti,ab,kw 27                                         |
| 17 | <b>22</b> | #1 or #2 or #3 or #4 or #5 or #6 or #7 or #8 or #9 or #10 or #11 or #12 or 6147 |
| 18 |           | #13 or #14 or #15 or #16 or #17 or #18 or #19 or #20 or #21                     |
| 19 | <b>23</b> | [mh ^neck] 445                                                                  |
| 20 | <b>24</b> | [mh ^"neck muscles"] 189                                                        |
| 21 | <b>25</b> | [mh "cervical plexus"] 97                                                       |
| 22 | <b>26</b> | [mh "cervical vertebrae"] 876                                                   |
| 23 | <b>27</b> | [mh ^"atlanto-axial joint"] 20                                                  |
| 24 | <b>28</b> | [mh ^"atlanto-occipital joint"] 6                                               |
| 25 | <b>29</b> | [mh ^"Cervical Atlas"] 3                                                        |
| 26 | <b>30</b> | [mh ^"spinal nerve roots"] 145                                                  |
| 27 | <b>31</b> | [mh "brachial plexus"] 900                                                      |
| 28 | <b>32</b> | odontoid* or cervical or occip* or atlant*:ti,ab,kw 14562                       |
| 29 | <b>33</b> | [mh ^"odontoid process"] 10                                                     |
| 30 | <b>34</b> | [mh ^"Thoracic Vertebrae"] 400                                                  |
| 31 | <b>35</b> | cervical vertebrae:ti,ab,kw 1028                                                |
| 32 | <b>36</b> | cervical plexus:ti,ab,kw 180                                                    |
| 33 | <b>37</b> | cervical spine:ti,ab,kw 1202                                                    |
| 34 | <b>38</b> | neck muscles:ti,ab,kw 579                                                       |
| 35 | <b>39</b> | brachial plexus:ti,ab,kw 1007                                                   |
| 36 | <b>40</b> | thoracic vertebrae:ti,ab,kw 490                                                 |
| 37 | <b>41</b> | neck:ti,ab,kw 12448                                                             |
| 38 | <b>42</b> | thoracic spine:ti,ab,kw 531                                                     |
| 39 | <b>43</b> | thoracic outlet:ti,ab,kw 32                                                     |
| 40 | <b>44</b> | trapezius:ti,ab,kw 386                                                          |
| 41 |           |                                                                                 |
| 42 |           |                                                                                 |
| 43 |           |                                                                                 |
| 44 |           |                                                                                 |
| 45 |           |                                                                                 |
| 46 |           |                                                                                 |
| 47 |           |                                                                                 |
| 48 |           |                                                                                 |
| 49 |           |                                                                                 |
| 50 |           |                                                                                 |
| 51 |           |                                                                                 |
| 52 |           |                                                                                 |
| 53 |           |                                                                                 |
| 54 |           |                                                                                 |
| 55 |           |                                                                                 |
| 56 |           |                                                                                 |
| 57 |           |                                                                                 |
| 58 |           |                                                                                 |
| 59 |           |                                                                                 |
| 60 |           |                                                                                 |

|           |                                                                                                                                                        |        |
|-----------|--------------------------------------------------------------------------------------------------------------------------------------------------------|--------|
| <b>45</b> | #23 or #24 or #25 or #26 or #27 or #28 or #29 or #30 or #31 or #32 or #33 or #34 or #35 or #36 or #37 or #38 or #39 or #40 or #41 or #42 or #43 or #44 | 27955  |
| <b>46</b> | [mh pain]                                                                                                                                              | 35540  |
| <b>47</b> | [mh injuries]                                                                                                                                          | 17847  |
| <b>48</b> | pain:ti,ab,kw                                                                                                                                          | 89051  |
| <b>49</b> | ache:ti,ab,kw                                                                                                                                          | 269    |
| <b>50</b> | sore:ti,ab,kw                                                                                                                                          | 1723   |
| <b>51</b> | stiff:ti,ab,kw                                                                                                                                         | 260    |
| <b>52</b> | discomfort:ti,ab,kw                                                                                                                                    | 7614   |
| <b>53</b> | injur*:ti,ab,kw                                                                                                                                        | 28417  |
| <b>54</b> | neuropath*:ti,ab,kw                                                                                                                                    | 6367   |
| <b>55</b> | #46 or #47 or #48 or #49 or #50 or #51 or #52 or #53 or #54                                                                                            | 133237 |
| <b>56</b> | #45 and #55                                                                                                                                            | 8163   |
| <b>57</b> | [mh ^Radiculopathy]                                                                                                                                    | 251    |
| <b>58</b> | [mh "temporomandibular joint disorders"]                                                                                                               | 554    |
| <b>59</b> | [mh "temporomandibular joint dysfunction syndrome"]                                                                                                    | 169    |
| <b>60</b> | [mh "myofascial pain syndromes"]                                                                                                                       | 401    |
| <b>61</b> | [mh "Sprains and Strains"]                                                                                                                             | 911    |
| <b>62</b> | [mh "Spinal Osteophytosis"]                                                                                                                            | 90     |
| <b>63</b> | [mh Neuritis]                                                                                                                                          | 68     |
| <b>64</b> | [mh ^polyradiculopathy]                                                                                                                                | 13     |
| <b>65</b> | [mh arthritis]                                                                                                                                         | 9924   |
| <b>66</b> | [mh ^Fibromyalgia]                                                                                                                                     | 756    |
| <b>67</b> | [mh ^spondylitis]                                                                                                                                      | 19     |
| <b>68</b> | [mh ^discitis]                                                                                                                                         | 8      |
| <b>69</b> | [mh ^spondylosis]                                                                                                                                      | 108    |
| <b>70</b> | [mh ^spondylolysis]                                                                                                                                    | 11     |
| <b>71</b> | [mh ^spondylolisthesis]                                                                                                                                | 134    |
| <b>72</b> | radiculopathy:ti,ab,kw                                                                                                                                 | 561    |
| <b>73</b> | radiculitis:ti,ab,kw                                                                                                                                   | 34     |
| <b>74</b> | temporomandibular:ti,ab,kw                                                                                                                             | 958    |
| <b>75</b> | myofascial pain syndrome*:ti,ab,kw                                                                                                                     | 486    |
| <b>76</b> | thoracic outlet syndrome*:ti,ab,kw                                                                                                                     | 27     |
| <b>77</b> | spinal osteophytosis:ti,ab,kw                                                                                                                          | 94     |
| <b>78</b> | neuritis:ti,ab,kw                                                                                                                                      | 452    |
| <b>79</b> | spondylosis:ti,ab,kw                                                                                                                                   | 339    |

|            |                                                                                                                                                                             |       |
|------------|-----------------------------------------------------------------------------------------------------------------------------------------------------------------------------|-------|
| <b>80</b>  | spondylitis:ti,ab,kw                                                                                                                                                        | 1023  |
| <b>81</b>  | spondylolisthesis:ti,ab,kw                                                                                                                                                  | 335   |
| <b>82</b>  | #57 or #58 or #59 or #60 or #61 or #62 or #63 or #64 or #65 or #66 or #67 or #68 or #69 or #70 or #71 or #72 or #73 or #74 or #75 or #76 or #77 or #78 or #79 or #80 or #81 | 14999 |
| <b>83</b>  | #45 and #82                                                                                                                                                                 | 1279  |
| <b>84</b>  | [mh neck]                                                                                                                                                                   | 445   |
| <b>85</b>  | [mh "cervical vertebrae"]                                                                                                                                                   | 876   |
| <b>86</b>  | [mh ^"thoracic vertebrae"]                                                                                                                                                  | 400   |
| <b>87</b>  | neck:ti,ab,kw                                                                                                                                                               | 12448 |
| <b>88</b>  | thoracic vertebrae:ti,ab,kw                                                                                                                                                 | 490   |
| <b>89</b>  | thoracic spine:ti,ab,kw                                                                                                                                                     | 531   |
| <b>90</b>  | cervical spine:ti,ab,kw                                                                                                                                                     | 1202  |
| <b>91</b>  | #84 or #85 or #86 or #87 or #88 or #89 or #90                                                                                                                               | 14136 |
| <b>92</b>  | [mh ^"Intervertebral Disk"]                                                                                                                                                 | 271   |
| <b>93</b>  | disc\$:ti,ab,kw                                                                                                                                                             | 3158  |
| <b>94</b>  | #92 or #93                                                                                                                                                                  | 3158  |
| <b>95</b>  | #91 and #94                                                                                                                                                                 | 409   |
| <b>96</b>  | herniat*:ti,ab,kw                                                                                                                                                           | 1002  |
| <b>97</b>  | slipped:ti,ab,kw                                                                                                                                                            | 34    |
| <b>98</b>  | prolapse*:ti,ab,kw                                                                                                                                                          | 1605  |
| <b>99</b>  | displace*:ti,ab,kw                                                                                                                                                          | 3532  |
| <b>100</b> | degenerat*:ti,ab,kw                                                                                                                                                         | 4479  |
| <b>101</b> | bulge or bulged or bulging:ti,ab,kw                                                                                                                                         | 224   |
| <b>102</b> | #96 or #97 or #98 or #99 or #100 or #101                                                                                                                                    | 10133 |
| <b>103</b> | #95 and #102                                                                                                                                                                | 271   |
| <b>104</b> | [mh ^"intervertebral disk degeneration"]                                                                                                                                    | 151   |
| <b>105</b> | [mh ^"intervertebral disk displacement"]                                                                                                                                    | 683   |
| <b>106</b> | intervertebral disk displacement:ti,ab,kw                                                                                                                                   | 215   |
| <b>107</b> | intervertebral disc displacement:ti,ab,kw                                                                                                                                   | 750   |
| <b>108</b> | intervertebral disk degeneration:ti,ab,kw                                                                                                                                   | 119   |
| <b>109</b> | intervertebral disc degeneration:ti,ab,kw                                                                                                                                   | 276   |
| <b>110</b> | #104 or #105 or #106 or #107 or #108 or #109                                                                                                                                | 1023  |
| <b>111</b> | #91 and #110                                                                                                                                                                | 181   |
| <b>112</b> | #111 or #103 or #83 or #56 or #22                                                                                                                                           | 9416  |
| <b>113</b> | cupping:ti,ab,kw                                                                                                                                                            | 313   |
| <b>114</b> | ventouse:ti,ab,kw                                                                                                                                                           | 47    |

|            |                                                              |     |
|------------|--------------------------------------------------------------|-----|
| <b>115</b> | MeSH descriptor: [Bloodletting] explode all trees            | 94  |
| <b>116</b> | bloodletting:ti,ab,kw                                        | 146 |
| <b>117</b> | blood letting:ti,ab,kw                                       | 74  |
| <b>118</b> | blood-letting:ti,ab,kw                                       | 70  |
| <b>119</b> | spilled blood:ti,ab,kw                                       | 4   |
| <b>120</b> | venesection:ti,ab,kw                                         | 57  |
| <b>121</b> | #113 or #114 or #115 or #116 or #117 or #118 or #119 or #120 | 546 |
| <b>122</b> | #112 and #121                                                | 37  |

**CNKI**

Date : : July. 30. 2016

|           | Searches                                                                                                                                   | Results |
|-----------|--------------------------------------------------------------------------------------------------------------------------------------------|---------|
| <b>#1</b> | (SU='颈痛'OR SU='颈肩部'OR SU='颈椎病' OR SU='颈肩部'OR SU='颈椎间盘突出症' OR SU='颈部'OR SU='神经根型颈椎病') AND (SU='罐' OR SU='cupping') AND (SU='随机' or SU='对照') | 157     |

**J-Stage**

Date: Sep. 10. 2016

|           | Searches                                         | Results |
|-----------|--------------------------------------------------|---------|
| <b>#1</b> | Full text : acupuncture AND neck pain AND random | 19      |
| <b>#2</b> | Full text : 漢方薬 AND neck AND random              | 5       |

**ICHUSHI**

Date: Sep. 10. 2016

|            | Searches                                      | Results |
|------------|-----------------------------------------------|---------|
| <b>#1</b>  | (頸椎症性脊髓症/TH or 頸椎症/AL)                        | 9,793   |
| <b>#2</b>  | 頸椎椎間板ヘルニア/AL                                  | 1,044   |
| <b>#3</b>  | ((@頸椎/TH and @脊椎損傷/TH and @捻挫/TH) or 頸椎捻挫/AL) | 310     |
| <b>#4</b>  | (頸部痛/TH or 頸部疼痛/AL)                           | 1,889   |
| <b>#5</b>  | 頸肩部痛/AL                                       | 3,584   |
| <b>#6</b>  | 頸肩部痛/AL                                       | 56      |
| <b>#7</b>  | #1 or #2 or #3 or #4 or #5 or #6              | 14,181  |
| <b>#8</b>  | (鍼療法/TH or 鍼/AL)                              | 32,246  |
| <b>#9</b>  | (漢方医学/TH or 漢方医学/AL)                          | 7,387   |
| <b>#10</b> | (灸療法/TH or 灸/AL)                              | 27,270  |
| <b>#11</b> | cupping/AL                                    | 27      |
| <b>#12</b> | 吸角/AL                                         | 22      |
| <b>#13</b> | (漢方薬/TH or 漢方薬/AL)                            | 58,323  |

|     |                                                                                |         |
|-----|--------------------------------------------------------------------------------|---------|
| #14 | (漢方薬/TH or 漢方/AL)                                                              | 66,206  |
| #15 | 湯/AL                                                                           | 73,638  |
| #16 | 散/AL                                                                           | 90,826  |
| #17 | 丸/AL                                                                           | 158,762 |
| #18 | (ランダム化比較試験/TH or RCT/AL)                                                       | 47,588  |
| #19 | (ランダム化比較試験/TH or ランダム化比較試験/AL)                                                 | 45,866  |
| #20 | random/AL                                                                      | 4,268   |
| #21 | (電気鍼療法/TH or electroacupuncture/AL)                                            | 1,454   |
| #22 | (電気鍼療法/TH or 電気鍼療法/AL)                                                         | 1,459   |
| #23 | #8 or #9 or #10 or #11 or #12 or #13 or #14 or #15 or #16 or #17 or #22 or #23 | 373,585 |
| #24 | #7 and #21 and #24                                                             | 34      |
| #25 | (#25) and (PT=会議録除く)                                                           | 17      |

**OASIS (Korea)**

Date : July. 20. 2016

|    | Searches            | Results |
|----|---------------------|---------|
| #1 | 경향통 OR 경추 OR 頸 OR 項 | 743     |

**NDSL (Korea)**

Date : July. 20. 2016

|    | Searches                                                                               | Results |
|----|----------------------------------------------------------------------------------------|---------|
| #1 | TI : (경향통 or 경추 or 頸 or 項 or "Neck pain") or AB : (경향통 or 경추 or 頸 or 項 or "Neck pain") | 731     |

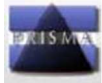

# PRISMA 2009 Checklist

| Section/topic                      | #  | Checklist item                                                                                                                                                                                                                                                                                              | Reported on page # |
|------------------------------------|----|-------------------------------------------------------------------------------------------------------------------------------------------------------------------------------------------------------------------------------------------------------------------------------------------------------------|--------------------|
| <b>TITLE</b>                       |    |                                                                                                                                                                                                                                                                                                             |                    |
| Title                              | 1  | Identify the report as a systematic review, meta-analysis, or both.                                                                                                                                                                                                                                         | 1                  |
| <b>ABSTRACT</b>                    |    |                                                                                                                                                                                                                                                                                                             |                    |
| Structured summary                 | 2  | Provide a structured summary including, as applicable: background; objectives; data sources; study eligibility criteria, participants, and interventions; study appraisal and synthesis methods; results; limitations; conclusions and implications of key findings; systematic review registration number. | 2                  |
| <b>INTRODUCTION</b>                |    |                                                                                                                                                                                                                                                                                                             |                    |
| Rationale                          | 3  | Describe the rationale for the review in the context of what is already known.                                                                                                                                                                                                                              | 4                  |
| Objectives                         | 4  | Provide an explicit statement of questions being addressed with reference to participants, interventions, comparisons, outcomes, and study design (PICOS).                                                                                                                                                  | 4                  |
| <b>METHODS</b>                     |    |                                                                                                                                                                                                                                                                                                             |                    |
| Protocol and registration          | 5  | Indicate if a review protocol exists, if and where it can be accessed (e.g., Web address), and, if available, provide registration information including registration number.                                                                                                                               | 4                  |
| Eligibility criteria               | 6  | Specify study characteristics (e.g., PICOS, length of follow-up) and report characteristics (e.g., years considered, language, publication status) used as criteria for eligibility, giving rationale.                                                                                                      | 5                  |
| Information sources                | 7  | Describe all information sources (e.g., databases with dates of coverage, contact with study authors to identify additional studies) in the search and date last searched.                                                                                                                                  | 4-5                |
| Search                             | 8  | Present full electronic search strategy for at least one database, including any limits used, such that it could be repeated.                                                                                                                                                                               | Appendix 1         |
| Study selection                    | 9  | State the process for selecting studies (i.e., screening, eligibility, included in systematic review, and, if applicable, included in the meta-analysis).                                                                                                                                                   | 4-5                |
| Data collection process            | 10 | Describe method of data extraction from reports (e.g., piloted forms, independently, in duplicate) and any processes for obtaining and confirming data from investigators.                                                                                                                                  | 5-6                |
| Data items                         | 11 | List and define all variables for which data were sought (e.g., PICOS, funding sources) and any assumptions and simplifications made.                                                                                                                                                                       | 5-6                |
| Risk of bias in individual studies | 12 | Describe methods used for assessing risk of bias of individual studies (including specification of whether this was done at the study or outcome level), and how this information is to be used in any data synthesis.                                                                                      | 5-6, 9             |
| Summary measures                   | 13 | State the principal summary measures (e.g., risk ratio, difference in means).                                                                                                                                                                                                                               | 6                  |
| Synthesis of results               | 14 | Describe the methods of handling data and combining results of studies, if done, including measures of consistency (e.g., $I^2$ ) for each meta-analysis.                                                                                                                                                   | 6                  |



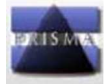

# PRISMA 2009 Checklist

Page 1 of 2

| Section/topic                 | #  | Checklist item                                                                                                                                                                                           | Reported on page # |
|-------------------------------|----|----------------------------------------------------------------------------------------------------------------------------------------------------------------------------------------------------------|--------------------|
| Risk of bias across studies   | 15 | Specify any assessment of risk of bias that may affect the cumulative evidence (e.g., publication bias, selective reporting within studies).                                                             | 7                  |
| Additional analyses           | 16 | Describe methods of additional analyses (e.g., sensitivity or subgroup analyses, meta-regression), if done, indicating which were pre-specified.                                                         | 6                  |
| <b>RESULTS</b>                |    |                                                                                                                                                                                                          |                    |
| Study selection               | 17 | Give numbers of studies screened, assessed for eligibility, and included in the review, with reasons for exclusions at each stage, ideally with a flow diagram.                                          | 6, Figure 1        |
| Study characteristics         | 18 | For each study, present characteristics for which data were extracted (e.g., study size, PICOS, follow-up period) and provide the citations.                                                             | 6-7, Table 1       |
| Risk of bias within studies   | 19 | Present data on risk of bias of each study and, if available, any outcome level assessment (see item 12).                                                                                                | 7<br>Figure 2      |
| Results of individual studies | 20 | For all outcomes considered (benefits or harms), present, for each study: (a) simple summary data for each intervention group (b) effect estimates and confidence intervals, ideally with a forest plot. | 7-9                |
| Synthesis of results          | 21 | Present results of each meta-analysis done, including confidence intervals and measures of consistency.                                                                                                  | 7-9                |
| Risk of bias across studies   | 22 | Present results of any assessment of risk of bias across studies (see Item 15).                                                                                                                          | 7-9<br>Figure 2    |
| Additional analysis           | 23 | Give results of additional analyses, if done (e.g., sensitivity or subgroup analyses, meta-regression [see Item 16]).                                                                                    | 7-9                |
| <b>DISCUSSION</b>             |    |                                                                                                                                                                                                          |                    |
| Summary of evidence           | 24 | Summarize the main findings including the strength of evidence for each main outcome; consider their relevance to key groups (e.g., healthcare providers, users, and policy makers).                     | 9                  |
| Limitations                   | 25 | Discuss limitations at study and outcome level (e.g., risk of bias), and at review-level (e.g., incomplete retrieval of identified research, reporting bias).                                            | 10                 |
| Conclusions                   | 26 | Provide a general interpretation of the results in the context of other evidence, and implications for future research.                                                                                  | 11                 |
| <b>FUNDING</b>                |    |                                                                                                                                                                                                          |                    |
| Funding                       | 27 | Describe sources of funding for the systematic review and other support (e.g., supply of data); role of funders for the systematic review.                                                               | 11                 |

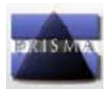

# PRISMA 2009 Checklist

For more information, visit: [www.prisma-statement.org](http://www.prisma-statement.org).

For peer review only

1  
2  
3  
4  
5  
6  
7  
8  
9  
10  
11  
12  
13  
14  
15  
16  
17  
18  
19  
20  
21  
22  
23  
24  
25  
26  
27  
28  
29  
30  
31  
32  
33  
34  
35  
36  
37  
38  
39  
40  
41  
42  
43  
44  
45  
46  
47

# BMJ Open

## Is cupping therapy effective in neck pain patients? A systematic review and meta-analysis

|                                 |                                                                                                                                                                                                                                                                                                                                                                                                                                                                                                                                                                                                                                                                                                                                                                                                                                                                                                                  |
|---------------------------------|------------------------------------------------------------------------------------------------------------------------------------------------------------------------------------------------------------------------------------------------------------------------------------------------------------------------------------------------------------------------------------------------------------------------------------------------------------------------------------------------------------------------------------------------------------------------------------------------------------------------------------------------------------------------------------------------------------------------------------------------------------------------------------------------------------------------------------------------------------------------------------------------------------------|
| Journal:                        | <i>BMJ Open</i>                                                                                                                                                                                                                                                                                                                                                                                                                                                                                                                                                                                                                                                                                                                                                                                                                                                                                                  |
| Manuscript ID                   | bmjopen-2017-021070.R1                                                                                                                                                                                                                                                                                                                                                                                                                                                                                                                                                                                                                                                                                                                                                                                                                                                                                           |
| Article Type:                   | Research                                                                                                                                                                                                                                                                                                                                                                                                                                                                                                                                                                                                                                                                                                                                                                                                                                                                                                         |
| Date Submitted by the Author:   | 16-May-2018                                                                                                                                                                                                                                                                                                                                                                                                                                                                                                                                                                                                                                                                                                                                                                                                                                                                                                      |
| Complete List of Authors:       | Kim, Seoyoun; Jaseng Medical Foundation, Jaseng Spine and Joint Research Institute; Korea University, Graduate school of Public Health<br>Lee, Sook-Hyun; Jaseng Medical Foundation, Jaseng Spine and Joint Research Institute<br>Kim, Me-riong; Jaseng Medical Foundation, Jaseng Spine and Joint Research Institute<br>Kim, Eun-jung; Dongguk University, Dept. of Acupuncture & Moxibustion, College of Korean Medicine<br>Hwang, Deok-Sang; Kyung Hee University, Department of Korean Medicine Obstetrics & Gynecology, College of Korean Medicine<br>Lee, Jinho; Jaseng Medical Foundation, Jaseng Spine and Joint Research Institute<br>Shin, Joon-Shik; Jaseng Medical Foundation, Jaseng Spine and Joint Research Institute<br>Ha, In-Hyuk; Jaseng Medical Foundation, Jaseng Spine and Joint Research Institute<br>Lee, Yoon Jae; Jaseng Medical Foundation, Jaseng Spine and Joint Research Institute |
| <b>Primary Subject Heading</b>: | Complementary medicine                                                                                                                                                                                                                                                                                                                                                                                                                                                                                                                                                                                                                                                                                                                                                                                                                                                                                           |
| Secondary Subject Heading:      | Rehabilitation medicine                                                                                                                                                                                                                                                                                                                                                                                                                                                                                                                                                                                                                                                                                                                                                                                                                                                                                          |
| Keywords:                       | Neck pain, Complementary Therapies, Meta-Analysis, Systematic Review                                                                                                                                                                                                                                                                                                                                                                                                                                                                                                                                                                                                                                                                                                                                                                                                                                             |
|                                 |                                                                                                                                                                                                                                                                                                                                                                                                                                                                                                                                                                                                                                                                                                                                                                                                                                                                                                                  |

SCHOLARONE™  
Manuscripts

## Is cupping therapy effective in neck pain patients? A systematic review and meta-analysis

Seoyoun Kim ([scheffer@korea.ac.kr](mailto:scheffer@korea.ac.kr)),<sup>1,2</sup> Sook-Hyun Lee ([sh00god@khu.ac.kr](mailto:sh00god@khu.ac.kr)),<sup>1</sup> Me-riong Kim ([krmkmr@naver.com](mailto:krmkmr@naver.com)),<sup>1</sup> Eun-Jung Kim ([hanijjung@naver.com](mailto:hanijjung@naver.com)),<sup>3</sup> Deok-Sang Hwang ([soulhus@gmail.com](mailto:soulhus@gmail.com)),<sup>4</sup> Jinho Lee ([jasengjsr@gmail.com](mailto:jasengjsr@gmail.com)),<sup>1</sup> Joon-Shik Shin ([Jasengmaster@gmail.com](mailto:Jasengmaster@gmail.com)),<sup>1</sup> In-Hyuk Ha ([hanihata@gmail.com](mailto:hanihata@gmail.com)),<sup>1</sup> Yoon Jae Lee ([goodsmile8119@gmail.com](mailto:goodsmile8119@gmail.com))<sup>1\*</sup>

<sup>1</sup>Jaseng Spine and Joint Research Institute, Jaseng Medical Foundation, Seoul, Republic of Korea

<sup>2</sup>Graduate school of Public Health, Korea University, Seoul, Republic of Korea

<sup>3</sup>Department of Acupuncture & Moxibustion, College of Korean Medicine, Dongguk University, Gyeongju, Republic of Korea

<sup>4</sup>Department of Korean Medicine Obstetrics & Gynecology, College of Korean Medicine, Kyung Hee University, Seoul, Republic of Korea

### \*Corresponding author

Yoon Jae Lee

Jaseng Spine and Joint Research Institute

Jaseng Medical Foundation

3F Jung-il Bldg, 538 Gangnam-daero, Gangnam-gu, Seoul, Republic of Korea 06110

E-mail: [goodsmile8119@gmail.com](mailto:goodsmile8119@gmail.com)

Tel: +82 2 2222 2745

Fax: +82 2 546 3854

## ABSTRACT

**Objectives:** Neck pain is a significant condition that is second only to depression as a cause of years lived with disability worldwide, and this should be sufficient reason to precipitate the search for effective treatment modalities. This systematic literature review aimed to investigate the effects of cupping on neck pain from current evidence.

**Design:** Systematic review and meta-analysis of randomised controlled trials (RCTs)

**Setting:** Nine databases, including Chinese, Korean and Japanese databases, through to January 2018

**Participants:** Neck pain patients

**Interventions:** Cupping therapy as the sole or add-on intervention compared with no treatment or active controls

**Primary and secondary outcome measures:** Pain severity, functional disability, and quality of life

**Results:** Eighteen RCTs were selected. Compared with the no intervention group, the cupping group exhibited significant reduction in pain (mean difference [MD] -2.42 [95% CI -3.98 to -0.86]) and improvement in function (MD -4.34 [95% CI -6.77 to -1.19]). Compared with the active control, the cupping group reported significant reduction in pain ( $P=0.0009$ ) and significantly improved quality of life ( $P=0.001$ ). The group that received control treatment with cupping therapy (add-on group) displayed significant pain reduction compared to the active control group ( $P=0.001$ ). Of all eighteen studies, only eight studies reported occurrence of adverse events (AEs), which were mild of nature. The selected studies described mild side effects of cupping, and none were serious.

**Conclusions:** Compared to no intervention or active controls, or as an add-on treatment, cupping was found to decrease pain in neck pain patients. Depending on the type of control group, cupping was also associated with significant improvement in terms of function and quality of life; however, it is difficult to draw definitive conclusions due to the low to very low quality of evidence. Future well-designed studies are warranted to substantiate the effectiveness of cupping on neck pain.

**Keywords:** Neck pain, Complementary Therapies, Meta-Analysis, Systematic Review

**ARTICLE SUMMARY****Strengths and limitations of this study**

- This systematic review investigated the effectiveness of cupping in treating pain, and placed no restrictions on publication language.
- This study employed stringent inclusion and exclusion criteria, and nine databases were accordingly searched for randomised controlled trials.
- The analysis also addressed functional improvement and quality of life, safety of cupping, risk of bias, and levels of evidence.
- The results of data synthesis may be limited due to the heterogeneity across selected studies, and low quality of evidence.

## INTRODUCTION

Studies analysing the 20 major causes of years lived with disability (YLD) from 2000 to 2012 worldwide reported that neck pain is the second leading cause of YLD following depression.<sup>1</sup> A Dutch study revealed that neck pain was associated with 1% of total medical expenditure and 0.1% of gross domestic product (GDP), 77% of which were indirect medical expenses associated with absence from work or disability expenses.<sup>2</sup> As reported in the present review, neck pain is an important condition whose prevalence is directly associated with escalated medical costs and negative impact on productivity, potentially increasing long-term absence from work.

Neck pain is a common disorder with a lifelong prevalence of 14.2% to 71% in adults, although these figures vary greatly across studies.<sup>3</sup> The disorder easily progresses to chronic conditions, with approximately 25% to 60% of patients developing chronic back or neck pain within the first year.<sup>4</sup> Furthermore, neck pain is reported to be most prevalent in high activity age groups, particularly individuals aged 35 to 49 years.<sup>5</sup> It is also more common in women.<sup>3</sup>

Standard first-line therapy for neck pain can be largely divided into pharmacological and non-pharmacological therapies. Pharmacological treatment frequently involves use of acetaminophen and nonsteroidal anti-inflammatory drugs (NSAIDs). However, acetaminophen and NSAIDs are known to increase risk of reduced liver function, liver failure, and haemorrhagic gastritis,<sup>6</sup> and side effects may be more common when these drugs are used in the long-term for chronic neck pain, which is often the case due to pain chronicity. For these reasons, many studies have investigated the clinical effectiveness of complementary and alternative medicine therapies, including acupuncture for chronic pain conditions such as pain of spinal origin.<sup>7</sup>

Cupping has been used globally across various countries such as Egypt and China, and its use dates back several thousand years.<sup>8</sup> Cupping is a physical treatment mainly employed by acupuncturists and other complementary and alternative medicine therapists that utilizes glass or plastic cups to create negative pressure on the skin over a painful area or acupuncture point through suction. The rationale for use of cupping is not yet fully explained; it is purported to be a detoxification process by which waste matter and toxins are removed, and as a harmonization process of Qi imbalance.<sup>8</sup> From a holistic perspective, cupping is widely used in Europe for inpatient care and the prevention and treatment of various disorders, as well as promotion of general health.<sup>9</sup> There are two types of cupping: dry and wet. Dry cupping is a technique in which cups are applied to the skin to create a vacuum for suction without drawing blood, whereas in wet cupping, blood is drawn with scarification before applying the cups for blood-letting. Cupping therapy is used for post-stroke rehabilitation and hypertension, and has been reported to be effective for treating pain and musculoskeletal disorders.<sup>10 11</sup> Cupping is particularly popular in South Korea and is covered by national health insurance; insurance claims for cupping reached a total 215,079,729,000 Korean won in 2013 alone.<sup>12</sup> Studies on the effects of cupping on neck pain include a systematic literature review published by Yuan et al., which reported that cupping is effective for reducing pain and improving function in chronic neck pain.<sup>13</sup> However, this 2015 systematic review covered articles published up to 2013, and as new clinical trials investigating cupping for neck pain have since been published, an updated systematic review on the topic is needed. Moreover, Yuan et al.<sup>13</sup> restricted the publication language in inclusion of study articles. The present review holds the advantage of not placing any restrictions on

1  
2  
3  
4 publication language in an attempt to conduct a more extensive and inclusive review before drawing any  
5 definite conclusions. This systematic review of randomised controlled trials (RCTs) was conducted in order to  
6 comprehensively assess the current evidence of cupping for neck pain as evaluated using pain, function, quality  
7 of life, and safety measures.  
8  
9

## 10 **METHODS**

11  
12 The protocol of this systematic literature review was registered in the PROSPERO International prospective  
13 register of systematic reviews (CRD42016047218). This review was performed and reported in adherence with  
14 the Preferred Reporting Items for Systematic Reviews and Meta Analyses (PRISMA).<sup>14</sup>  
15  
16

### 17 **Literature search**

18  
19 Studies that used cupping as an intervention for neck pain were searched in the Ovid-Medline (1946 to Jan  
20 2018), Ovid-EMBASE (1980 to Jan 2018), Ovid-AMED (1985 to Dec 2017), and the Cochrane Central Register  
21 of Controlled Trials (CENTRAL) up to January 9, 2018. The Chinese database China National Knowledge  
22 Infrastructure (CNKI), Korean databases Oriental Medicine Advanced Searching Integrated System (OASIS)  
23 and National Discovery for Science Leader (NDSL), and Japanese databases J-stage and ISHUSHI were also  
24 used. Search terms included a combination of Medical Subject Headings (MeSH) terms such as neck pain (e.g.,  
25 neck pain, cervical spondylosis, cervical radiculopathy, cervical disc herniation, and myofascial pain syndrome)  
26 and cupping. Details of the search strategy are presented in Appendix 1. No language restrictions were emplaced.  
27  
28  
29  
30

### 31 **Study inclusion and exclusion**

32  
33 Two or more investigators (YJL, SYK, and/or SHL) independently selected articles for analysis from the  
34 searched articles. After excluding duplicate publications, titles and abstracts were reviewed to primarily screen  
35 for articles according to the inclusion and exclusion criteria. The full texts of these articles were then reviewed  
36 for secondary screening of articles per inclusion and exclusion criteria. Only RCTs were considered. Any  
37 disagreement in the study selection process was resolved by discussion, and when an agreement was not reached,  
38 a third investigator intervened to reach consensus. The publication language of study articles was not restricted.  
39  
40 Subjects encompassed adult patients with neck pain, including neck pain with neuropathy, and did not  
41 discriminate between acute and chronic phases. However, post-traumatic pain caused by whiplash or sports  
42 injuries was excluded as the natural history of neck pain may differ in such cases. Furthermore, patients with  
43 myelopathy or cervical headache/vertigo without neck pain were also excluded. All types of cupping therapies  
44 were included without restrictions regarding dry or wet cupping, and the type of cupping device was also not  
45 limited. Control groups included patients who underwent usual care for neck pain, such as physical therapy,  
46 NSAIDs, heat pack therapy, and acupuncture,<sup>15-17</sup> as well as inactive controls such as waiting lists or no  
47 intervention groups. The outcome variables assessing the effectiveness of cupping included pain intensity, neck  
48 disability indexes, and quality of life (QoL). Pain intensity was measured using visual analogue scale (VAS), the  
49 McGill Pain Questionnaire, and the Northwick Park Neck Pain Questionnaire (NPQ). The Neck Disability Index  
50  
51  
52  
53  
54



(NDI) was generally used to evaluate neck function disability. QoL was assessed using the 36-item Short-form (SF-36) and EQ-5D questionnaires. However, studies that did not use objective instruments and only reported outcomes in terms of improvement rates without standards or investigations that used instruments without confirmation of reliability and validity were excluded.

#### **Risk of bias evaluation and data extraction**

Risk of bias in the RCTs was assessed by seven categories according to the Cochrane Risk of Bias. Studies that used appropriate methods for each item and specified the methods in the text were considered to have low risk of bias; studies that did not perform or used inappropriate methods were considered to have high risk of bias; and studies that did not mention or used ambiguous expressions were considered to have an unclear risk of bias. Two or more investigators independently assessed all research data, and disagreements were resolved through discussion. When an agreement could not be reached, a third investigator intervened to reach consensus. Two reviewers independently read the full text of all articles and extracted data according to a pre-determined format. Any disagreements were resolved by discussion between the two reviewers.

#### **Data analysis**

A meta-analysis was performed using quantitative data from each study to assess the effectiveness of cupping. The mean difference (MD) and 95% confidence interval (CI) were calculated using the Cochrane Collaboration software (Review Manager [RevMan] version 5.3, Copenhagen: The Nordic Cochrane Centre) for Windows (Microsoft Corporation, Redmond, WA, USA). Heterogeneity across studies was assessed using the  $\chi^2$  (chi-squared) test with a significance level of  $P < 0.10$  and the  $I^2$  statistic. When heterogeneity was statistically significant, the cause of heterogeneity was analysed through subgroup analysis. We also conducted sensitivity analyses to test the robustness of the impact of a single study on the overall results. If we found statistical heterogeneity, the sensitivity analyses (by eliminating 1 study at a time) were performed to explore the possible reasons for this heterogeneity. A random effect model was applied, and publication bias was not assessed when the number of studies in the group was  $< 10$ .

#### **Quality of evidence**

The quality of evidence for each outcome was assessed in accordance with the Grading of Recommendations, Assessment, Development and Evaluation (GRADE). Quality of evidence was classified into high, moderate, low, and very low. To determine the quality of evidence, the following domains were assessed according to the standards suggested by the GRADE group: risk of bias; imprecision; inconsistency; indirectness; publication bias; large magnitude of effect; dose-response; and confounding.<sup>18</sup>

#### **Patient and Public Involvement**

Patients and public were not involved in development of the research question and outcome measures, design of this study, or recruitment to and conduct of the study as a systematic review and meta analysis. There are no

plans for the results to be disseminated directly to study participants.

## RESULTS

### Search results

A total of 541 articles were retrieved, including 86 from Ovid-Medline, 137 from Ovid-EMBASE, 19 from Ovid-AMED, 43 from the Cochrane Library, 193 from a Chinese database, 47 from Korean databases and 16 from Japanese databases. Following the first and second rounds of screening, a total of 18 articles were selected for review. Search results are shown in Figure 1.

### Features of the included studies

A total of 18 studies were analysed in two separate analyses<sup>19-36</sup>: direct comparison of the cupping (sole) and control groups; and an add-on analysis comparing the control with cupping group with the control only group. Two studies used three groups; 15 studies were included in the sole analysis while five studies were included in the add-on analysis.

Seven<sup>19 21 23 26-28 34</sup> of the 18 studies used wet cupping while eleven studies used dry cupping. The frequency of cupping therapy varied greatly. Two studies performed only one round of therapy, and four conducted two to four rounds. The majority of studies conducted >10 rounds of therapy because most treated patients had neck pain with radiculopathy or were chronic neck pain cases. The region of administration was mostly the upper shoulder and neck area, and primarily Ashi or other proximal acupoints. As these studies mainly treated pain, most presented pain scores in the form of VAS scores; disability was presented in NDI scores, while QoL was mostly reflected in the responses to the EQ-5D and SF-36 questionnaires. The features of each study are presented in Table 1.

Table 1. Characteristics of the included studies

| Study ID                               | Country | Disease                                                  | Number of participants | Age (years, mean±SD)            | Methods of Intervention | Comparison                 | Cupping sites                                                                                    | Number of cupping | Follow up period           | Relevant Outcomes (Primary/secondary) |
|----------------------------------------|---------|----------------------------------------------------------|------------------------|---------------------------------|-------------------------|----------------------------|--------------------------------------------------------------------------------------------------|-------------------|----------------------------|---------------------------------------|
| <b>Cupping vs Control (Sole)</b>       |         |                                                          |                        |                                 |                         |                            |                                                                                                  |                   |                            |                                       |
| <i>Vs waitlist (no intervention)</i>   |         |                                                          |                        |                                 |                         |                            |                                                                                                  |                   |                            |                                       |
| Arslan 2015                            | Turkey  | computer users diagnosed minimum 3 neck pain             | EG: 20, CG: 20         | EG: 26.0±3.5, CG: 26.0±3.8      | Dry cupping (moving)    | no intervention            | upper shoulder and neck region                                                                   | 10                | After treatment            | VAS                                   |
| Chi 2016                               | Taiwan  | work-related chronic neck shoulder pain                  | EG: 30, CG: 30         | EG: 43.6±6.3, CG: 42.5±5.8      | Dry cupping             | no intervention            | SI15, GB21, LI15                                                                                 | 1                 | After treatment            | VAS                                   |
| Lauche 2011                            | Germany | chronic nonspecific neck pain                            | EG: 22, CG: 24         | EG: 26.1±4.2, CG: 25.1±3.0      | Dry cupping             | Waiting list control group | descending and transverse parts of the trapezius muscle                                          | 5                 | After treatment            | VAS, NDI, SF-36                       |
| Saha 2017                              | Germany | Chronic neck pain                                        | EG: 25, CG: 25         | EG: 54.3 ± 8.6, CG: 53.3 ± 11.1 | Dry cupping             | Waiting list control group | from the occiput towards the mid-level thoracic spine as well as over the upper trapezius muscle | 5                 | Post-cupping after 3 weeks | VAS, POM, NDI, SF-36                  |
| Lauche 2012                            | Germany | chronic nonspecific neck pain                            | EG: 22, CG: 23         | EG: 54.8±3.2, CG: 29.3±2.9      | Wet cupping             | Waiting list control group | descending parts of the trapezius muscle                                                         | 1                 | Post-cupping after 3 days  | VAS, NDI, SF-36                       |
| <i>Vs active control (dry cupping)</i> |         |                                                          |                        |                                 |                         |                            |                                                                                                  |                   |                            |                                       |
| Sui 2008*                              | China   | cervical radiculopathy                                   | EG: 120, CG: 120       | NR                              | Dry cupping (moving)    | traction                   | Acupoints at Bladder Meridian and Vessel Governor                                                | 20                | After treatment            | VAS, POM, NDI, SF-36                  |
| Cramer 2011                            | Germany | nonspecific neck pain for at least the previous 3 months | EG: 24, CG: 24         | EG: 44.46, CG: 47.88            | Dry cupping             | Standard Medical Care      | Neck and shoulder lesion                                                                         | 3-4               | After treatment            | VAS, NDI, SF-36                       |

| Study ID                                              | Country              | Disease                        | Number of participants | Age (years, mean±SD)                   | Methods of Intervention       | Comparison                         | Cupping sites                                                                                                                                           | Number of cupping | Follow up period | Relevant Outcomes (Primary/secondary) |
|-------------------------------------------------------|----------------------|--------------------------------|------------------------|----------------------------------------|-------------------------------|------------------------------------|---------------------------------------------------------------------------------------------------------------------------------------------------------|-------------------|------------------|---------------------------------------|
| Kim 2012                                              | Korea                | VDT workers with neck pain     | EG: 20 CG: 20          | EG : 25.5 (median)<br>CG : 28 (median) | Dry cupping                   | Heating pad group                  | GV14, GV16, GV15, GV12, GB20, GB21, LI17, SI11, SI12, SI13, SI14, SI15, BL10, BL11, BL12, BL13, BL14, BL15, BL16, BL17, BL41, BL42, BL43, BL44, EX-HN15 | 6                 | 7 weeks          | NRS, NDI, EQ-5D                       |
| Lauche 2013                                           | Germany              | chronic nonspecific neck pain  | EG: 30 CG: 31          | EG: 54.5±12.3<br>CG: 53.7±13.4         | Dry cupping                   | progressive muscle relaxation(PMR) | NR                                                                                                                                                      | 24                | 12 weeks         | VAS, NDI, SF-36                       |
| <i>Vs active control (wet cupping)</i>                |                      |                                |                        |                                        |                               |                                    |                                                                                                                                                         |                   |                  |                                       |
| Liu 2016                                              | China                | cervical spondylosis           | EG: 20, CG: 20         | NR                                     | Wet cupping                   | Tuina                              | GV14, Ashi points                                                                                                                                       | 3                 | After treatment  | VAS, effective rate, tenderness       |
| Mou 2015                                              | China (Multi center) | cervical radiculopathy         | EG: 68, CG: 56         | EG: 46.4±11.6<br>CG: 47.8±11.9         | Wet cupping                   | MA                                 | GV14, GB21                                                                                                                                              | 4-12              | After treatment  | VAS, NDI, CAS                         |
| Yin 2009                                              | China                | cervical spondylosis           | EG: 56 CG: 55          | EG: 32.13±7.87<br>CG: 35.24±6.67       | Wet cupping                   | MA                                 | EX-B2, BL11, GB21, Ashi points                                                                                                                          | 10                | After treatment  | VAS, effective rate                   |
| Zhou 2014                                             | China                | Cervical Spondylopathy         | EG:100 CG:100          | NR                                     | Wet cupping                   | MA                                 | Ashi points, EX-B2, GB21                                                                                                                                | 10                | After treatment  | VAS , effective rate                  |
| Jin 2014                                              | China                | neck type cervical spondylosis | EG: 33 CG: 33          | EG: 31.81±8.30<br>CG: 30.48±9.74       | Wet cupping                   | MA                                 | upper shoulder and neck region                                                                                                                          | 5                 | After treatment  | VAS, NPQ, effective rate              |
| Yin 2016                                              | China                | Cervical Spondylosis           | EG: 47, CG: 48         | EG: 45.68 ± 10.46, CG: 47.29 ± 8.03    | Wet cupping                   | acupuncture                        | EX - B2, SI15, GB21, SJ5                                                                                                                                | 4                 | After treatment  | NPQ                                   |
| <b>Cupping with usual care vs usual care (Add-on)</b> |                      |                                |                        |                                        |                               |                                    |                                                                                                                                                         |                   |                  |                                       |
| <i>Dry cupping</i>                                    |                      |                                |                        |                                        |                               |                                    |                                                                                                                                                         |                   |                  |                                       |
| Cai 2015                                              | China                | Chronic neck pain              | EG: 60 CG: 60          | EG: 45.48±10.9<br>CG: 45.7±11.1        | Dry cupping                   | MA                                 | EX-B2                                                                                                                                                   | 12                | After treatment  | SF-MPQ                                |
| Su 2016                                               | China                | Neck pain after sleeping       | EG:29 CG:29            | EG: 30.72±6.69<br>CG: 31.76±7.16       | Dry cupping                   | MA                                 | upper shoulder and neck region                                                                                                                          | 3                 | After treatment  | VAS, effective rate                   |
| Sui 2008                                              | China                | cervical radiculopathy         | EG: 120, CG: 120       | NR                                     | Dry cupping (moving)+traction | traction                           | Acupoints at Bladder Meridian and Governor Vessel                                                                                                       | 20                | After treatment  | VAS                                   |
| <i>Wet cupping</i>                                    |                      |                                |                        |                                        |                               |                                    |                                                                                                                                                         |                   |                  |                                       |

| Study ID   | Country             | Disease                                       | Number of participants | Age (years, mean±SD)           | Methods of Intervention | Comparison | Cupping sites                  | Number of cupping | Follow up period | Relevant Outcomes (Primary/secondary) |
|------------|---------------------|-----------------------------------------------|------------------------|--------------------------------|-------------------------|------------|--------------------------------|-------------------|------------------|---------------------------------------|
| Mou 2015   | China (Multicenter) | cervical radiculopathy                        | EG: 59, CG: 56         | EG: 45.4±11.6<br>CG: 47.8±11.9 | Wet cupping+MA          | MA         | EX-B2, BL11, GB21, Ashi points | 10                | After treatment  | VAS, NDI, CAS                         |
| Jiang 2017 | China               | Myofascial Pain Syndrome of Neck and Shoulder | EG:30 CG:30            | EG: 21±3<br>CG: 22±3           | Wet cupping+MA          | MA         | Ashi points                    | 5                 | After treatment  | VAS , effective rate                  |

CAS: Clinical assessment scale, CG: control group, EA: electroacupuncture, EG: experimental group, EQ-5D: Euroqol5-D health utility, MA: manual acupuncture, NDI: Neck Disability Index, NPQ: Neck Pain Questionnaire, NR: not reported, SD: Standard deviation, SF-MPQ: Short Form McGill Pain Questionnaire, SF-36: 36-Item Short Form Health Survey, VAS: Visual Analogue Scale, VDT: Video Display Terminal, POM: Pain on movement

\*The study is a three-armed study, i.e. cupping group, control group, cupping plus control group.

## Risk of bias assessment

**Random sequence:** Seven of the 18 studies<sup>20 22-25 27 28</sup> were assessed to have low risk of bias as they randomly allocated the subjects using a table of random numbers. One study did not specify the randomization method, and the group size notably varied, i.e. 68, 56, and 59; this study was thus assessed to have high risk of bias.<sup>26</sup> The remaining 10 studies, however, only mentioned randomly assigning subjects without specifying the method used for randomization; thus, these studies were assessed to have an unclear risk of bias. The results are shown in Figure 2.

**Allocation concealment:** Nine<sup>20 22 24-26 28-31</sup> studies concealed allocation using a sealed envelope, and thus were considered to have low risk of bias. The remaining studies were determined to be unclear because they did not describe the method of allocation concealment used.

**Blinding:** Control groups were either waiting list controls or active controls. Although efforts have been made to develop a sham version of cupping<sup>37</sup>, blinding is difficult given that sham cupping is not often used. Chi et al.<sup>29</sup> described single blinding; however, it was difficult to assess whether blinding was actually implemented. Hence, all studies were considered to not have blinded their investigators and participants. With regard to the blinding of participants and personnel, all studies were considered to have high risk of bias. Similarly, blinding of outcome assessors was not performed in most studies as many used VAS for pain measurement and patient-reported outcomes. Blinding of outcome assessors would have been made feasible if the studies had used physician-reported outcomes or other outcome variables measured by the examiner; however, such studies were found lacking. Therefore, all studies were assessed to have high risk of bias.

**Incomplete outcome data:** Seven<sup>20 22 24 25 27 30 31</sup> studies reported the number of excluded and withdrawn participants, and the number of participants included for final analysis. It was decided that the number of withdrawn participants and the reason for withdrawal were not a cause of bias; therefore, these studies were considered to have low risk of bias. One study was regarded to possess high risk of bias as 33 participants from the intervention group and 27 from the control group dropped out after only one session of treatment.<sup>26</sup> The remaining studies were determined to be unclear for not mentioning the number of participants who withdrew or were excluded.

**Selective reporting:** Ten<sup>20 22 24 25 27 29-31</sup> of the 18 studies were determined to have unclear risk of bias regarding selective reporting as they did not describe adverse events nor did they register the trial protocols. The remaining eight studies were found to have reported all outcome variables initially planned to be investigated, and thus were determined to have low risk of bias.

**Other biases:** All studies were assessed to have low risk of other biases.

## Analysis

### *Cupping versus no treatment*

**Pain:** Five studies were included in the meta-analysis.<sup>20 29-32</sup> Compared with the no intervention group, the cupping group reported significant reduction in pain with an MD of -2.42 (95% CI -3.98 to -0.86). Considerable heterogeneity was observed ( $I^2=93\%$ ;  $P<0.00001$  [chi-square test]); however, the study by Chi 2016<sup>29</sup> showed a

1  
2  
3  
4 statistically outlying effect size; a sensitivity analysis was conducted with the study omitted, and resulted in an  
5 MD of -1.48 (95% CI -1.86, -1.10; I<sup>2</sup>=0%; P=0.57)) with the heterogeneity resolved.

6 *Disability:* Three studies were included in the analysis.<sup>20 30 31</sup> The results revealed that the cupping group  
7 reported significant functional improvement compared with the no intervention group with an MD of -4.34 (95%  
8 CI -6.77 to -1.91; I<sup>2</sup>=6%; P=0.35).

9  
10 *QoL:* Three studies were included in the analysis,<sup>20 30 31</sup> and results showed that the cupping group indicated  
11 significant improvement in the mental component summary of SF-36, with an MD of 5.32 (95% CI 0.83 to 9.80;  
12 I<sup>2</sup>=32%; P=0.23). No statistical significance was found in terms of the physical component summary of SF-36  
13 with an MD of 2.46 (95% CI -0.36, 5.29) (Figure 3).

#### 14 **Cupping versus active control**

15  
16 *Pain:* Ten studies were included in the analysis.<sup>21-28 34 35</sup> Of these 10 studies, nine reported the outcome in VAS,  
17 while one study reported NPQ scores.<sup>21</sup> In analysis of the nine studies, the cupping group exhibited significant  
18 reduction in pain with an MD of -0.89 (95% CI -1.42 to -0.37; P=0.0009) compared with the control group. The  
19 chi-square test, however, revealed some heterogeneity (p<0.00001; I<sup>2</sup> =88%). In order to resolve the  
20 heterogeneity, studies were separately analysed depending on the type of cupping: either wet (with scarification)  
21 or dry. Meta-analysis of three studies conducted with dry cupping indicated an MD of -1.50 (95% CI -2.28 to -  
22 0.72 ; I<sup>2</sup>=28%; P=0.25). On the other hand, analysis of studies with wet cupping showed an MD of -0.70 (95%  
23 CI -1.32 to -0.07 ; I<sup>2</sup>=92%; P<0.00001) with unresolved heterogeneity. Omission of the study by Zhou 2014<sup>28</sup> –  
24 the effect size of which was notably large – resulted in an MD of -0.49 (95% CI -0.78 to -0.20) with I<sup>2</sup>=-35%,  
25 P=0.19, implying that the heterogeneity was considerably resolved. The one study that reported outcomes with  
26 NPQ indicated an MD of 3.59 (95% CI 2.02, 5.16), suggesting that cupping significantly decreased pain  
27 compared to the control.

28  
29 *Disability:* Four studies were included in the analysis.<sup>22 24-26</sup> Compared with the control, the cupping group  
30 demonstrated functional improvement, with an MD of -4.36 (95% CI -8.67 to -0.04; P=0.05), but not to a  
31 statistically significant degree, and substantial heterogeneity was identified (I<sup>2</sup>=62%; P=0.05).

32  
33 *QoL:* Two studies were included in this analysis.<sup>22 25</sup> Compared with the control, the cupping group reported  
34 significant improvement in the physical component summary of SF-36, with an MD of 5.44 (95% CI 2.09 to  
35 8.78; P=0.001). However, statistically significant differences were not found for the mental component  
36 summary of SF-36 with an MD of 0.44 (95% CI -4.05, 4.93) (Figure 4). The study by Kim et al. reported EQ-  
37 5D outcomes as median values, and therefore inclusion for meta-analysis was not feasible. In this study, the  
38 cupping group and control reported identical median values of 0.91, suggesting no statistical difference.

#### 39 **Cupping with active control versus active control (add-on)**

40  
41 *Pain:* Five studies were included in the analysis.<sup>19 26 33 35 36</sup> Adding cupping therapy to the treatment  
42 administered in the control group led to significant reduction in pain, with an MD of -0.87 (95% CI -1.14 to -  
43 0.61; P<0.00001).

44  
45 *Disability:* Only one study reported a disability-related outcome,<sup>26</sup> and the effect on disability was not  
46 significant, with an MD of 3.61 (95% CI -3.93 to 11.15; P=0.35). Heterogeneity was not identified (I<sup>2</sup>=19%;  
47  
48  
49  
50  
51  
52  
53  
54

1  
2  
3  
4 P=0.29) (Figure 5).  
5

### 6 **Safety of cupping**

7  
8 Ten of the 18 studies included in the final analysis did not address safety, while eight studies did. First, Kim et  
9 al.<sup>24</sup> reported skin laceration (n=1), whole body itching (n=1), pain at the cupping sites (n=1), and generalized  
10 body ache (n=1) in four patients in the cupping group; however, the study reported that the symptoms were mild  
11 and resolved within a few days. Lauche et al. (2012)<sup>31</sup> reported one case of pain during the procedure itself in  
12 addition to tension headache, migraine, tinnitus, and wound healing itches; however, all side effects were mild  
13 and temporary. Chi et al.<sup>29</sup> reported two cases of mild low back pain due to the seated position in the cupping  
14 group. Lauche et al. (2013)<sup>25</sup> reported muscular tension (n=1), increased pain (n=1), and prolapsed intervertebral  
15 disc (n=1), while prolapsed intervertebral disc should be regarded to be a severe event, the original authors  
16 stated that a causal relationship was unlikely. Lauche et al. (2011)<sup>30</sup> reported tingling sensation in the hands and  
17 arms (n=1), strain/pain at the treated area (n=2), strain/pain in their general neck region (n=1), slight headache  
18 (n=1), tiredness (n=1), shivering attack (n=1), and blurred vision (n=1). Lauche et al. (2011) reported that all  
19 symptoms subsided within four hours, and that the causal relationship with cupping was unclear. Yin et al.<sup>27</sup>  
20 reported one case of delayed wound healing due to wet cupping. Cramer et al.<sup>22</sup> reported muscle soreness (n=2),  
21 minor hematoma (n=1), and increased neck pain for 1 hour to 5 hours (n=2). In the study by Saha et al.,<sup>20</sup> two  
22 participants complained of headache that resolved within one hour. One participant suffered upper back pain,  
23 which subsided within days, and one participant reported slight dizziness. Although one case of lipoma was  
24 identified during the trial, it did not have any causal relationship with cupping, as reported by the authors.  
25  
26  
27  
28  
29  
30  
31

### 32 **Levels of evidence**

33 The quality of evidence for each analysis is shown in Table 2. In the waiting list comparison, the quality of  
34 evidence for the outcomes of pain, QoL, and disability was assessed to be low to very low due to concerns  
35 regarding risk of bias, imprecision and inconsistency. In the active control comparison, the quality of evidence  
36 for the outcomes of pain and QoL was low in consideration of the risk of bias and imprecision, and that for  
37 disability was assessed to be very low due to risk of bias, imprecision, and unexplained heterogeneity. In the  
38 add-on comparison between the active control, and active control with cupping groups, the quality of evidence  
39 for pain in the dry cupping add-on group was low due to risk of bias and unexplained heterogeneity. The quality  
40 of evidence for pain outcomes was very low. The quality of evidence for disability outcomes in the add-on  
41 groups was low due to risk of bias and imprecision (Table 2).  
42  
43  
44  
45  
46  
47  
48  
49  
50  
51  
52  
53  
54  
55  
56  
57  
58  
59  
60



Table 2. Meta-analysis of outcomes and level of evidence

| Variable                                              | Overall effect |              |          |                |          | Statistical method      | Studies (N) | Sample size (N) | Level of evidence |
|-------------------------------------------------------|----------------|--------------|----------|----------------|----------|-------------------------|-------------|-----------------|-------------------|
|                                                       | MD             | 95% CI       | P        | I <sup>2</sup> | P        |                         |             |                 |                   |
| <b>Cupping versus Waitlist (Sole)</b>                 |                |              |          |                |          |                         |             |                 |                   |
| Pain (VAS)                                            | -2.42          | -3.98, -0.86 | 0.002    | 93             | <0.00001 | Random Inverse Variance | 5           | 241             | Very low          |
| Pain (VAS) omitted 1 studies                          | -1.48          | -1.86, -1.10 | <0.00001 | 0              | 0.57     | Random Inverse Variance | 4           | 181             | -                 |
| Disability (NDI)                                      | -4.34          | -6.77, -1.91 | 0.0005   | 6              | 0.35     | Random Inverse Variance | 3           | 141             | Low               |
| QoL (Physical component of SF-36)                     | 2.46           | -0.36, 5.29  | 0.09     | 24             | 0.27     | Random Inverse Variance | 3           | 141             | Low               |
| QoL (Mental component of SF-36)                       | 5.32           | 0.83, 9.80   | 0.02     | 32             | 0.23     | Random Inverse Variance | 3           | 141             | Low               |
| <b>Cupping versus Active control (Sole)</b>           |                |              |          |                |          |                         |             |                 |                   |
| Pain (VAS)                                            | -0.89          | -1.42, -0.37 | 0.0009   | 88             | <0.00001 | Random Inverse Variance | 9           | 870             | Low               |
| Pain (VAS) of dry cupping                             | -1.48          | -1.86, -1.10 | <0.00001 | 0              | 0.57     | Random Inverse Variance | 3           | 149             | -                 |
| Pain (VAS) of wet cupping                             | -0.70          | -1.32, -0.07 | 0.03     | 92             | <0.00001 | Random Inverse Variance | 6           | 721             | -                 |
| Pain (VAS) of wet cupping omitted 1 studies           | -0.49          | -0.78, -0.20 | 0.0008   | 35             | 0.19     | Random Inverse Variance | 5           | 521             | -                 |
| Disability (NDI)                                      | -4.36          | -8.67, -0.04 | 0.05     | 62             | 0.05     | Random Inverse Variance | 4           | 213             | Very low          |
| QoL (SF-36) (Physical component of SF-36)             | 5.44           | 2.09, 8.78   | 0.001    | 7              | 0.30     | Random Inverse Variance | 2           | 109             | Low               |
| QoL (SF-36) (Mental component of SF-36)               | 0.44           | -4.05, 4.93  | 0.85     | 0              | 0.59     | Random Inverse Variance | 2           | 109             | Low               |
| <b>Cupping with active control vs control (addon)</b> |                |              |          |                |          |                         |             |                 |                   |
| Pain (VAS)                                            | -0.87          | -1.14, -0.61 | <0.00001 | 19             | 0.29     | Random Inverse Variance | 5           | 534             | Low               |
| Disability (NDI)                                      | 3.61           | -3.93, 11.15 | 0.35     | -              | -        | Random Inverse Variance | 1           | 56              | Low               |

VAS: Visual analogue scale, NDI: Neck disability index, QoL: Quality of life, MD: Mean difference

## DISCUSSION

The present study aimed to assess the evidence supporting the effectiveness of cupping on neck pain through a comprehensive systematic literature review. We performed a systematic and inclusive search in non-Asian as well as Asian databases, including those from China, Korea, and Japan, where cupping is popular and widely used. Eighteen articles were selected and analysed according to the type of control group used. When compared with inactive controls, cupping significantly reduced pain and improved function and QoL. The heterogeneity was quite high in terms of pain reduction, and the quality of evidence was lowered as a consequence. As the study by Chi reported a considerably large effect size, the heterogeneity was resolved upon omission of this study in sensitivity analysis. The quality of evidence was found to be low to very low in most studies; however, the marked reduction in pain, functional improvement, and improvement in QoL associated with cupping compared with no interventions may be construed to be clinically relevant. When compared with active controls, the cupping group exhibited significant reduction in pain but no significant differences for functional improvement. Analysis in pain outcomes found an MD of -0.89 (95% CI -1.42, -0.37). However, heterogeneity was high and subgroup analysis was therefore performed. Effect sizes were similar across studies using dry cupping; however, effect sizes varied greatly across studies using wet cupping. Omission of the study by Zhou 2014<sup>28</sup> resolved the heterogeneity. Additional analyses are needed to substantiate whether the differences may be attributed to the difference in types of wet cupping procedures or whether other factors are at play. Wet cupping involves drawing blood before cupping, and may be well accepted in some cultures, but otherwise incur fear and aversion in others. Furthermore, the intensity of the procedure and amount of bleeding may also have affected outcomes, which may have further contributed to the varying effect sizes. However, the type and frequency of procedures, and patient pain severity may also have contributed to the varying effect sizes. When added on to existing treatments, cupping significantly reduced pain, with an MD of -0.87 (95% CI -1.14 to -0.61). In addition to statistical significance, the effect size must be assessed in terms of clinical significance. Based on four studies of cupping, Lauche et al.<sup>38</sup> proposed the minimal clinically important difference (MCID) of VAS to be -8 (-0.8 of a ten point scale), the NDI to be -3, and the physical component summary of SF-36 to be +5.1. From the current meta-analysis, cupping exhibited an MD of -2.42 compared to the waiting list control, -0.89 compared to the active control, and -0.87 as an add-on treatment, which all surpasses the above criteria for the MCID of VAS. With regard to NDI, cupping indicated an MD of between -4.34 and -4.36, depending on the type of control, which again sufficed the MCID criteria. For the physical component summary, however, cupping failed to display a treatment effect larger than MCID; Yet, when compared to the active control, cupping showed an effect size exceeding MCID, which calls for further investigation.

Records of cupping, also known as hijama, document how its use dates back several thousand years, and how it originated and has been employed in such diverse regions as early Egypt and China.<sup>8</sup> In traditional Chinese medicine, cupping is widely used to eliminate stagnated Qi and Blood, and facilitate circulation.<sup>39</sup> Since ancient times, cupping has been considered to be effective for local areas of inflammation.<sup>40</sup> A review of various studies concerning the mechanism of cupping suggested that cupping exerts its effects by means of a haemodynamic mechanism that facilitates muscle function, as demonstrated by the reduction of deoxy-haemoglobin and

1  
2  
3  
4 elevated oxy-haemoglobin levels in muscle areas treated with cupping.<sup>41</sup> In other studies, cupping was purported  
5 to involve a mechanism for removing oxidative stress,<sup>42</sup> and to produce therapeutic effects through diffuse  
6 noxious inhibitory control,<sup>43</sup> which would contribute to alleviation of pain.

7  
8 For these reasons, a growing number of clinical trials are investigating the effects of cupping on pain and  
9 various disease symptoms. Through analysis of 135 RCTs on cupping, Cao 2012<sup>44</sup> reported that clinical trials of  
10 wet cupping have been conducted in association with such disorders as herpes zoster, facial paralysis,  
11 cough/dyspnea, and acne. There is also a more recent systematic review that investigated cupping in relation to  
12 overall disease;<sup>45</sup> however, the review only included some articles pertaining to neck pain and did not focus on  
13 the condition. In another systematic literature review on the efficacy of cupping for lower back pain, cupping led  
14 to significant reductions in pain and improvement of function.<sup>13 46</sup> There was also a study that specifically  
15 evaluated the effect of cupping on neck pain, but the study was published in 2013.<sup>13</sup> This previous study only  
16 analysed five trials whereas the present review was conducted with 18 RCTs. The results of this study, therefore,  
17 are hoped to hold and convey stronger evidence as well as greater clinical relevance and implications. In this  
18 context, the present study is considered to hold heightened significance in that it analysed more recent evidence  
19 on the effects of cupping for neck pain without language restrictions.

20  
21 However, this study also holds several limitations. One significant shortcoming is that only some studies  
22 reported issues related to safety. Although severe adverse events were not found in association with cupping in  
23 the studies that reported side effects, there were a greater number of studies that did not report side effects, and  
24 this calls for more well-designed, large-scale studies investigating the potential side effects of cupping. A  
25 systematic review investigating the side effects of cupping reported that the most common side effect was scar  
26 formation, and there were also some cases of severe side effects.<sup>47</sup> However, adverse reactions to cupping may  
27 vary according to the proficiency of the practitioner, type of procedure, and disinfection and sterilization  
28 processes implemented during the treatment procedure.<sup>47</sup> Certain severe AEs such as infection may be pre-  
29 emptively avoided as its occurrence is directly associated with the education and training, and experience and  
30 proficiency of therapists. Another limitation was that the quality of evidence was either low or very low for all  
31 outcomes. The primary causes of the low quality of evidence were risk of bias and unexplained heterogeneity.  
32 The quality of evidence for random sequence and allocation concealment would not have been lowered if the  
33 studies had been performed correctly; however, the selected studies did not maintain rigorous standards and  
34 procedures regarding these issues. In addition, most of the included studies, except for the one by Su 2016,<sup>33</sup>  
35 were conducted only in chronic neck pain patients. Whether the therapeutic effect of cupping is dependent on  
36 the clinical characteristics (acute vs. chronic) of neck pain remains to be elucidated. Nevertheless, cupping is an  
37 invaluable therapy that persons who have received proper training can use easily. Lauche et al. (2013)<sup>25</sup>  
38 performed a clinical trial on home-based cupping. Due to the increase of computer and smartphone use, the  
39 prevalence of neck pain is rising steadily,<sup>48</sup> and neck pain is also notorious for its high percentage of chronicity.  
40 The findings of this study are meaningful in that it represents a non-invasive, simple, and effective treatment  
41 modality for patients with chronic pain.

42  
43 Cupping was shown to be effective for neck pain in this review. However, the current review on the effect of  
44  
45  
46  
47  
48  
49  
50  
51  
52  
53

cupping was unable to find conclusive evidence, and this suggests the need for more high-quality RCTs. Study designs should implement standardized randomization and allocation procedures, and appropriate blinding of outcome assessors where possible. To obtain more conclusive evidence regarding the effectiveness and safety of cupping, such well-designed clinical trials are warranted. Similarly, the safety and risks of cupping could not be sufficiently assessed due to the lack of studies reporting AEs. Although no serious AEs have been reported so far in the analyzed trials, the majority of trials failed to give any mention of AE occurrence. Further investigations are required to draw solid conclusions regarding the safety of cupping therapy. Firm conclusions on clinical use of cupping for pain disorders shall be made possible only through such rigorous assessments of safety and effectiveness.

## CONCLUSION

The current results suggest that cupping may be effective for neck pain patients in terms of pain, function, and quality of life compared to no treatment or active controls. The level of evidence for the findings, however, was found to be low or very low, which prevented the study from drawing firm conclusions. Although this study did not identify notable adverse events in the articles reviewed for this study, cupping is not without side effects, and further well-designed large-scale studies employing standardized procedures are needed for thorough examination of its potential side effects. Furthermore, wet cupping requires rigorous education and training on hygiene and precautions as it entails a blood-letting process. Although this study was unable to draw any definite conclusions, it holds significance in that it showcased the possibility of cupping use as an effective and safe therapy for neck pain.

## FOOTNOTES

**Contributors:** SK, MRK, IHH, and YJL designed the study. SK, SHL and YJL conducted the systematic search. SK, MRK, and YJL assessed the literatures for inclusion and extracted the data. JL, JSS, and IHH monitored data collection. EJK, DSH, JL, JSS, and IHH interpreted the data. SK, MRK, IHH, and YJL wrote the draft; SHL, EJK, DSH, JL, and JSS critically revised the manuscript. All authors have read and approved the final version.

**Funding:** This study was supported by the Traditional Korean Medicine R&D Program funded by the Ministry of Health & Welfare through the Korea Health Industry Development Institute (KHIDI) (HB16C0035).

**Competing Interests:** None declared

**Provenance and peer review:** Not commissioned; externally peer reviewed.

**Data sharing statement:** No additional data are available.

## Reference

1. World Health Organization. Global Health Estimates: Deaths, disability-adjusted life year (DALYs), years of life lost (YLL) and years lost due to disability (YLD) by cause, age, and sex: 2000–2012, 2016.
2. Borghouts JA, Koes BW, Vondeling H, et al. Cost-of-illness of neck pain in The Netherlands in 1996. *Pain* 1999;80(3):629-36.
3. Fejer R, Kyvik KO, Hartvigsen J. The prevalence of neck pain in the world population: a systematic critical review of the literature. *European spine journal* 2006;15(6):834-48.
4. Manchikanti L, Singh V, Datta S, et al. Comprehensive review of epidemiology, scope, and impact of spinal pain. *Pain physician* 2009;12(4):E35-70.
5. Hoy D, Protani M, De R, et al. The epidemiology of neck pain. *Best Practice & Research Clinical Rheumatology* 2010;24(6):783-92.
6. Fine M. Quantifying the impact of NSAID-associated adverse events. *The American journal of managed care* 2013;19(14 Suppl):s267-72.
7. MacPherson H, Tilbrook H, Richmond S, et al. Alexander Technique Lessons or Acupuncture Sessions for Persons With Chronic Neck Pain: A Randomized Trial. *Annals of internal medicine* 2015;163(9):653-62.
8. Qureshi NA, Ali GI, Abushanab TS, et al. History of cupping (Hijama): a narrative review of literature. *Journal of integrative medicine* 2017;15(3):172-81.
9. Romeyke T, Stummer H. Evidence-based complementary and alternative medicine in inpatient care: take a look at Europe. *Journal of evidence-based complementary & alternative medicine* 2015;20(2):87-93.
10. Lee MS, Choi T-Y, Shin B-C, et al. Cupping for hypertension: a systematic review. *Clinical and Experimental Hypertension* 2010;32(7):423-25.
11. Farhadi K, Schwebel DC, Saeb M, et al. The effectiveness of wet-cupping for nonspecific low back pain in Iran: a randomized controlled trial. *Complementary therapies in medicine* 2009;17(1):9-15.
12. Kim JD, Son MS. 2013 National health insurance statistical yearbook. Seoul: Health Insurance Review and Assessment Service and National Health Insurance Service, 2014.
13. Yuan Q-l, Guo T-m, Liu L, et al. Traditional Chinese medicine for neck pain and low back pain: a systematic review and meta-analysis. *PLoS One* 2015;10(2):e0117146.
14. Moher D, Shamseer L, Clarke M, et al. Preferred reporting items for systematic review and meta-analysis protocols (PRISMA-P) 2015 statement. *Systematic reviews* 2015;4(1):1.
15. Aker PD, Gross AR, Goldsmith CH, et al. Conservative management of mechanical neck pain: systematic overview and meta-analysis. *Bmj* 1996;313(7068):1291-96.
16. Kjaer P. National clinical guideline for the non-surgical treatment of recent onset non-specific neck pain. *Danish Health Authority* 2016
17. Choi AR, Shin J-S, Lee J, et al. Current practice and usual care of major cervical disorders in Korea: A cross-sectional study of Korean health insurance review and assessment service national patient sample data. *Medicine* 2017;96(46)

18. Atkins D, Eccles M, Flottorp S, et al. Systems for grading the quality of evidence and the strength of recommendations I: critical appraisal of existing approaches The GRADE Working Group. *BMC health services research* 2004;4(1):38.
19. Jiang X, Liu J, Cheng F, et al. Effects obseration of manipulation, blood-leting puncture and cupping in treating myofascilal pain syndrome of neck and shoulder. *Chinese Journal of Ethnomedicine and Ethnopharmacy* 2017;26(14):117-19.
20. Saha FJ, Schumann S, Cramer H, et al. The effects of cupping massage in patients with chronic neck pain-a randomised controlled trial. *Complementary medicine research* 2017;24(1):26-32.
21. Yin L, Zhang T, Liang Z, et al. Effect of different acupuncture treatment on cervical spondylosis. *Liaoning Journal of Traditional Chinese Medicine* 2016;43(9):1971-74.
22. Cramer H, Lauche R, Hohmann C, et al. Randomized controlled trial of pulsating cupping (pneumatic pulsation therapy) for chronic neck pain. *Complementary Medicine Research* 2011;18(6):327-34.
23. Jin N, Wang B, Li G. Clinical observation of Yang's multiple tapping and cupping for the treatment of neck type cervical spondylosis. *Shanghai Journal of Traditional Chinese Medicine* 2014;48(8):59-60.
24. Kim T-H, Kang JW, Kim KH, et al. Cupping for treating neck pain in video display terminal (VDT) users: a randomized controlled pilot trial. *Journal of occupational health* 2012;54(6):416-26.
25. Lauche R, Materdey S, Cramer H, et al. Effectiveness of home-based cupping massage compared to progressive muscle relaxation in patients with chronic neck pain—a randomized controlled trial. *PLoS one* 2013;8(6):e65378.
26. Mou M-y, Piao S-a, Meng X-w, et al. Therapeutic efficacy observation on bloodletting and cupping for cervical radiculopathy. *Journal of Acupuncture and Tuina Science* 2015;13(4):236-41.
27. Yin J, Wang H. [Fifty-six cases of cervical spondylosis patients treated with wet cupping therapy (in Chinese)]. *Hubei journal of traditional chinese medicine* 2009;31(1):27-28.
28. Zhou H, Huang G, Li X, et al. [A hundread clinical cases of cervical spondylopathy patients treated with wet cupping using Zhuang-style lotus flower needle (in Chinese)]. *Journal of Sichuan of Traditional Chinese Medicine* 2014;32(12):142-43.
29. Chi L-M, Lin L-M, Chen C-L, et al. The effectiveness of cupping therapy on relieving chronic neck and shoulder pain: a randomized controlled trial. *Evidence-Based Complementary and Alternative Medicine* 2016;2016
30. Lauche R, Cramer H, Choi K-E, et al. The influence of a series of five dry cupping treatments on pain and mechanical thresholds in patients with chronic non-specific neck pain-a randomised controlled pilot study. *BMC complementary and alternative medicine* 2011;11(1):63.
31. Lauche R, Cramer H, Hohmann C, et al. The effect of traditional cupping on pain and mechanical thresholds in patients with chronic nonspecific neck pain: a randomised controlled pilot study. *Evidence-based complementary and alternative medicine* 2012;2012
32. Arslan M, Yaman G, Ilhan E, et al. Moving dry cupping therapy reduces upper shoulder and neck pain in office workers. *CLINICAL AND INVESTIGATIVE MEDICINE* 2015;38(4):E217-E20.

- 1  
2  
3  
4 33. Su M, Huang X, Zhang H, et al. Effect of moving cupping and acupuncture on neck pain after sleeping.  
5 *Journal of New Chinese Medicine* 2016;48(2):96-99.  
6  
7 34. Liu F, Hu M, Sun W. Comparative effect of traditional chinese medicine therapy on cervical spondylosis.  
8 *World Latest Medicine Information* 2016;16(18):189-90.  
9  
10 35. Sui G, Wang H. Cupping, Intermittent traction with tuina treatment of 120 cases of cervical spondylosis.  
11 *Shandong Medical Journal* 2008;48(24):79-80.  
12  
13 36. Cai R, Mao X. Clinical observation of treatment by Jiaji cupping on chronic pain for cervical spondylosis.  
14 *Zhejaing Journal of Traditional Chinese Medicine* 2015;50(9):673-73.  
15  
16 37. Lee MS, Kim J-I, Kong JC, et al. Developing and validating a sham cupping device. *Acupuncture in*  
17 *Medicine* 2010;28(4):200-04.  
18  
19 38. Lauche R, Langhorst J, Dobos GJ, et al. Clinically meaningful differences in pain, disability and quality of  
20 life for chronic nonspecific neck pain—a reanalysis of 4 randomized controlled trials of cupping therapy.  
21 *Complementary therapies in medicine* 2013;21(4):342-47.  
22  
23 39. Chirali IZ. Traditional Chinese Medicine Cupping Therapy-E-Book: Elsevier Health Sciences 2014.  
24  
25 40. Turk J, Allen E. Bleeding and cupping. *Annals of the Royal College of Surgeons of England* 1983;65(2):128.  
26  
27 41. Li T, Li Y, Lin Y, et al. Significant and sustaining elevation of blood oxygen induced by Chinese cupping  
28 therapy as assessed by near-infrared spectroscopy. *Biomedical optics express* 2017;8(1):223-29.  
29  
30 42. Tagil SM, Celik HT, Cifteci S, et al. Wet-cupping removes oxidants and decreases oxidative stress.  
31 *Complementary therapies in medicine* 2014;22(6):1032-36.  
32  
33 43. Calvino B, Grilo RM. Central pain control. *Joint Bone Spine* 2006;73(1):10-16.  
34  
35 44. Cao H, Li X, Liu J. An updated review of the efficacy of cupping therapy. *PloS one* 2012;7(2):e31793.  
36  
37 45. Al Bedah AM, Khalil MK, Posadzki P, et al. Evaluation of wet cupping therapy: systematic review of  
38 randomized clinical trials. *The Journal of Alternative and Complementary Medicine* 2016;22(10):768-77.  
39  
40 46. Wang Y-T, Qi Y, Tang F-Y, et al. The effect of cupping therapy for low back pain: A meta-analysis based on  
41 existing randomized controlled trials. *Journal of back and musculoskeletal rehabilitation* 2017(Preprint):1-9.  
42  
43 47. Al-Bedah AM, Shaban T, Suhaibani A, et al. Safety of Cupping Therapy in Studies Conducted in Twenty  
44 One Century: A Review of Literature. 2016  
45  
46 48. Kim S-Y, Koo S-J. Effect of duration of smartphone use on muscle fatigue and pain caused by forward head  
47 posture in adults. *Journal of physical therapy science* 2016;28(6):1669-72.  
48  
49  
50  
51  
52  
53  
54  
55  
56  
57  
58  
59  
60

**FIGURE LEGENDS**

**Figure 1.** PRISMA flow diagram of the literature search

PRISMA : Preferred Reporting Items for Systematic Reviews and Meta Analyses

**Figure 2.** Risk of bias in the included studies, as assessed using the Cochrane Collaboration's risk of bias tool

+: high risk of bias, ?: unclear risk of bias, -: low risk of bias

**Figure 3.** Forest plots demonstrating the effect of cupping as the sole intervention vs no treatment on neck pain

CI: confidence interval

**Figure 4.** Forest plots demonstrating the effect of cupping as the sole intervention vs active control on neck pain

CI: confidence interval

**Figure 5.** Forest plots demonstrating the effect of cupping as the add-on intervention on neck pain

CI: confidence interval



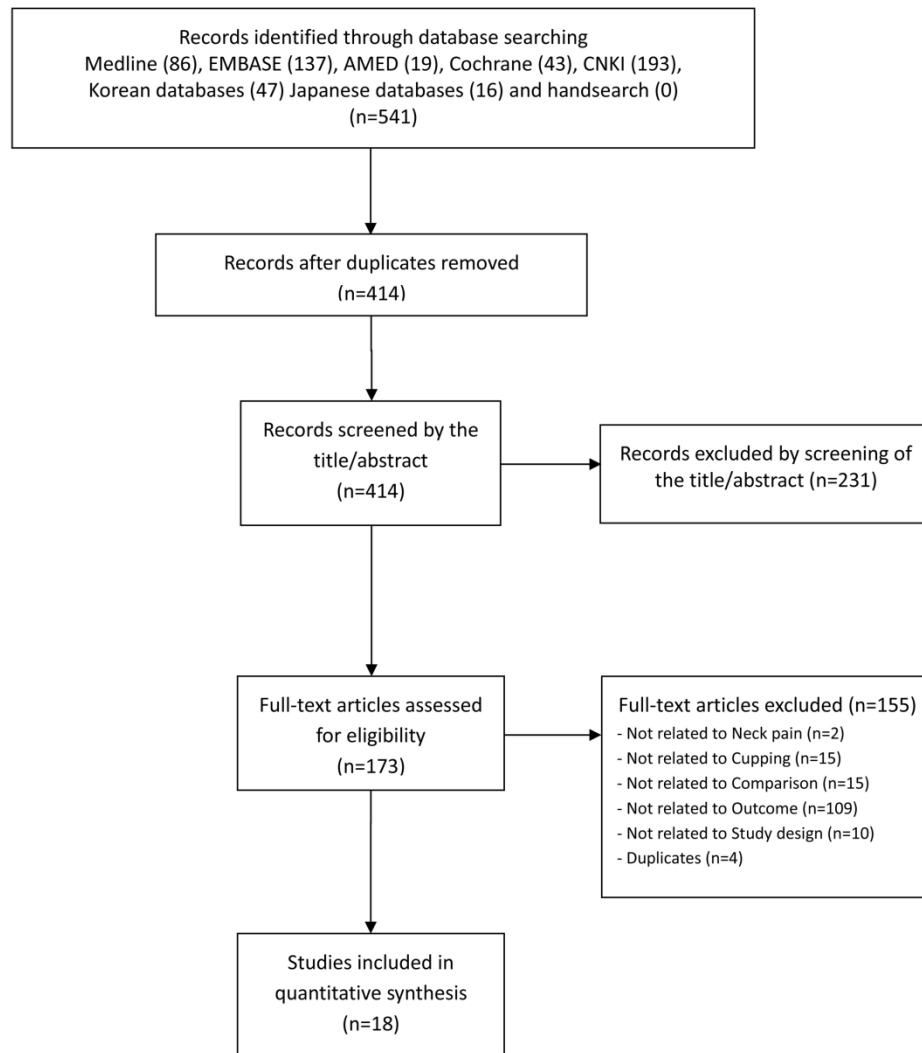

Figure 1. PRISMA flow diagram of the literature search

PRISMA : Preferred Reporting Items for Systematic Reviews and Meta Analyses

Figure 1. PRISMA flow diagram of the literature search  
PRISMA : Preferred Reporting Items for Systematic Reviews and Meta Analysis

214x256mm (300 x 300 DPI)

1  
2  
3  
4  
5  
6  
7  
8  
9  
10  
11  
12  
13  
14  
15  
16  
17  
18  
19  
20  
21  
22  
23  
24  
25  
26  
27  
28  
29  
30  
31  
32  
33  
34  
35  
36  
37  
38  
39  
40  
41  
42  
43  
44  
45  
46  
47  
48  
49  
50  
51  
52  
53  
54  
55  
56  
57  
58  
59  
60

|             | Random sequence generation (selection bias) | Allocation concealment (selection bias) | Blinding of participants and personnel(performance bias) | Blinding of outcome assessment (detection bias) | Incomplete outcome data (attrition bias) | Selective reporting (reporting bias) | Other bias |
|-------------|---------------------------------------------|-----------------------------------------|----------------------------------------------------------|-------------------------------------------------|------------------------------------------|--------------------------------------|------------|
| Arslan2015  | ?                                           | ?                                       | ●                                                        | ●                                               | ?                                        | ?                                    | +          |
| Cai 2015    | ?                                           | ?                                       | ●                                                        | ●                                               | ?                                        | ?                                    | +          |
| Chi 2016    | ?                                           | +                                       | ●                                                        | ●                                               | ?                                        | +                                    | +          |
| Cramer 2011 | +                                           | +                                       | ●                                                        | ●                                               | +                                        | +                                    | +          |
| Jiang 2017  | ?                                           | ?                                       | ●                                                        | ●                                               | ?                                        | ?                                    | +          |
| Jin 2014    | +                                           | ?                                       | ●                                                        | ●                                               | ?                                        | ?                                    | +          |
| Kim 2012    | +                                           | +                                       | ●                                                        | ●                                               | +                                        | +                                    | +          |
| Lauche 2011 | ?                                           | +                                       | ●                                                        | ●                                               | +                                        | +                                    | +          |
| Lauche 2012 | ?                                           | +                                       | ●                                                        | ●                                               | +                                        | +                                    | +          |
| Lauche 2013 | +                                           | +                                       | ●                                                        | ●                                               | +                                        | +                                    | +          |
| Liu 2016    | ?                                           | ?                                       | ●                                                        | ●                                               | ?                                        | ?                                    | +          |
| Mou 2015    | ●                                           | +                                       | ●                                                        | ●                                               | ●                                        | ?                                    | +          |
| Saha 2017   | +                                           | +                                       | ●                                                        | ●                                               | +                                        | +                                    | +          |
| Su 2016     | ?                                           | ?                                       | ●                                                        | ●                                               | ?                                        | ?                                    | +          |
| Sui 2008    | ?                                           | ?                                       | ●                                                        | ●                                               | ?                                        | ?                                    | +          |
| Yin 2009    | +                                           | ?                                       | ●                                                        | ●                                               | ?                                        | +                                    | +          |
| Yin 2016    | ?                                           | ?                                       | ●                                                        | ●                                               | +                                        | ?                                    | +          |
| Zhou 2014   | +                                           | +                                       | ●                                                        | ●                                               | ?                                        | ?                                    | +          |

Figure 2. Risk of bias in the included studies, as assessed using the Cochrane Collaboration's risk of bias tool  
+ : high risk of bias, ? : unclear risk of bias, - : low risk of bias

264x731mm (300 x 300 DPI)

3.1 Effect of cupping on pain (versus no treatment)

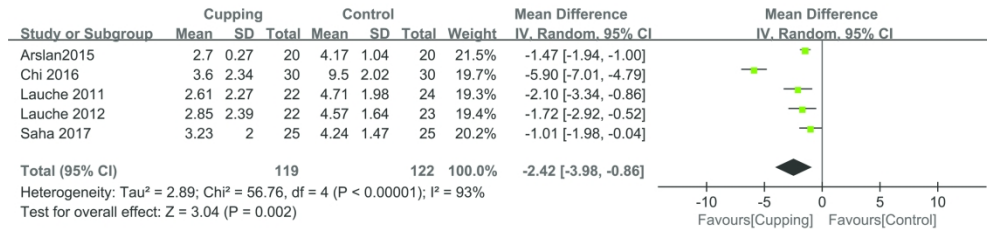

3.2 Effect of cupping on disability (versus no treatment)

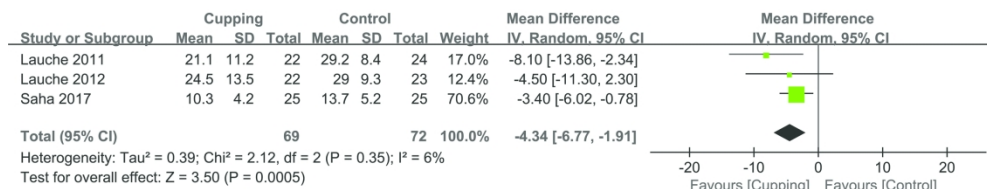

3.3 Effect of cupping on quality of life (physical component summary)

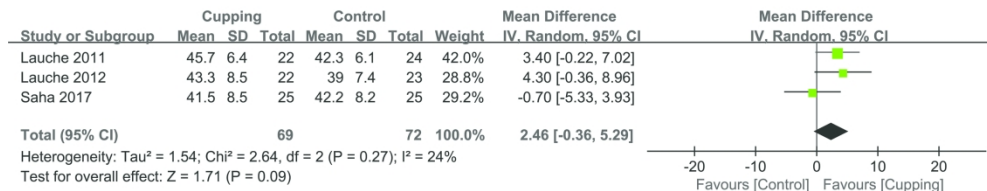

3.4 Effect of cupping on quality of life (mental component summary)

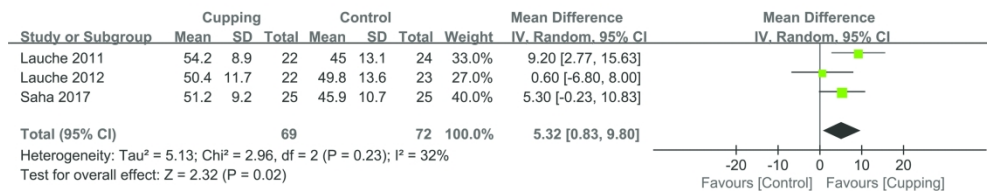

Figure 3. Forest plots demonstrating the effect of cupping as the sole intervention vs no treatment on neck pain

CI : confidence interval

236x285mm (300 x 300 DPI)

## 4.1 Effect of cupping on pain (versus active control)

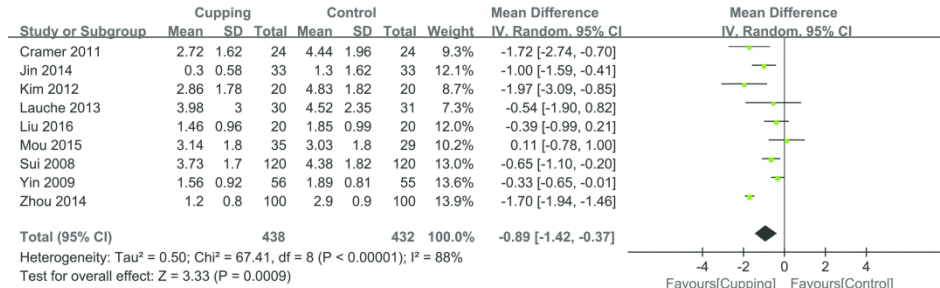

## 4.2 Effect of cupping on disability (versus active control)

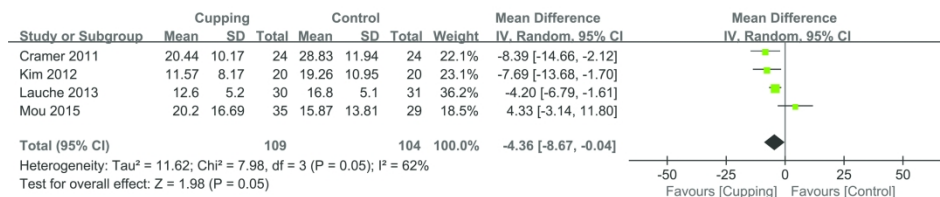

## 4.3 Effect of cupping on quality of life (physical component summary)

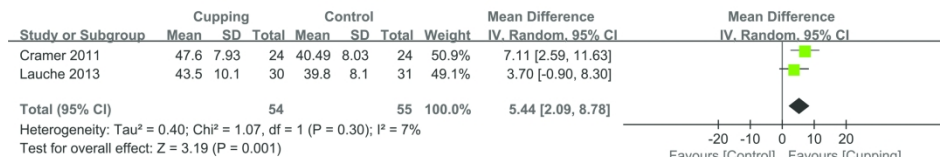

## 4.4 Effect of cupping on quality of life (mental component summary)

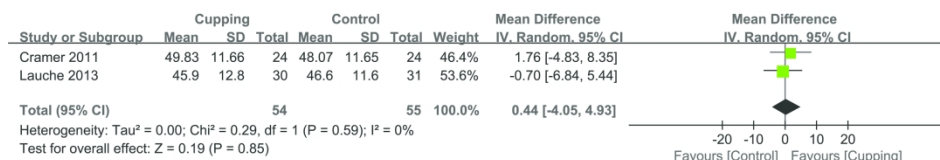

Figure 4. Forest plots demonstrating the effect of cupping as the sole intervention vs active control on neck pain  
CI : confidence interval

247x313mm (300 x 300 DPI)

5.1 Effect of cupping with active control on pain (versus active control)

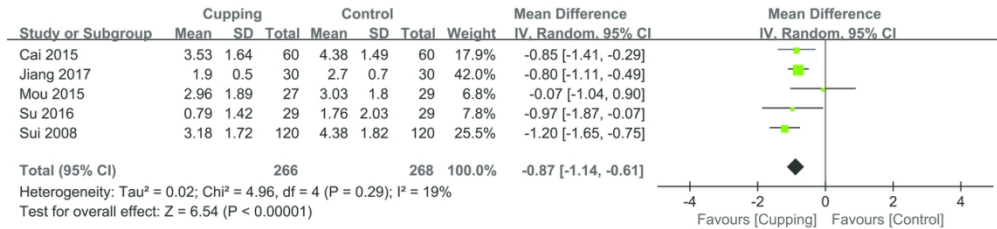

5.2 Effect of cupping with active control on disability (versus active control)

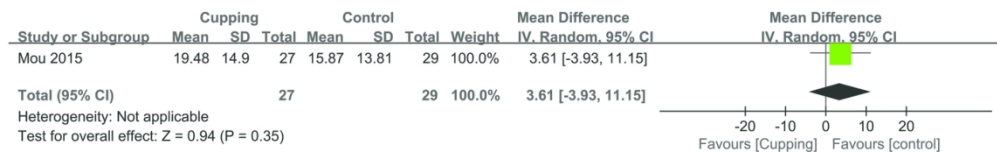

Figure 5. Forest plots demonstrating the effect of cupping as the add-on intervention on neck pain  
 CI : confidence interval

119x72mm (300 x 300 DPI)

## Appendix S1 Search strategy

| Ovid-Medline 1946 to Jan Week 1 2018 Date: 2018.01.08 |                                                                    |         |
|-------------------------------------------------------|--------------------------------------------------------------------|---------|
|                                                       | Searches                                                           | Results |
| 1                                                     | Neck Pain/                                                         | 6385    |
| 2                                                     | exp Brachial Plexus Neuropathies/                                  | 3563    |
| 3                                                     | cervical pain.mp.                                                  | 961     |
| 4                                                     | neckache.mp.                                                       | 20      |
| 5                                                     | cervicodynia.mp.                                                   | 9       |
| 6                                                     | cervicalgia.mp.                                                    | 114     |
| 7                                                     | brachialgia.mp.                                                    | 165     |
| 8                                                     | brachial neuritis.mp.                                              | 174     |
| 9                                                     | brachial neuralgia.mp.                                             | 122     |
| 10                                                    | neck pain.mp.                                                      | 14709   |
| 11                                                    | neck injur*.mp.                                                    | 5953    |
| 12                                                    | brachial plexus neuropath*.mp.                                     | 2277    |
| 13                                                    | brachial plexus neuritis.mp.                                       | 1527    |
| 14                                                    | thoracic outlet syndrome/ or cervical rib syndrome/                | 2228    |
| 15                                                    | Torticollis/                                                       | 3691    |
| 16                                                    | exp brachial plexus neuropathies/ or exp brachial plexus neuritis/ | 3563    |
| 17                                                    | cervico brachial neuralgia.ti,ab.                                  | 43      |
| 18                                                    | cervicobrachial neuralgia.ti,ab.                                   | 68      |
| 19                                                    | (monoradicul* or monoradicl*).tw.                                  | 143     |
| 20                                                    | or/1-19                                                            | 33193   |
| 21                                                    | neck/                                                              | 30018   |
| 22                                                    | neck muscles/                                                      | 6076    |
| 23                                                    | exp cervical plexus/                                               | 8027    |
| 24                                                    | exp cervical vertebrae/                                            | 38618   |
| 25                                                    | atlanto axial joint                                                | 1767    |
| 26                                                    | atlanto occipital joint                                            | 3372    |
| 27                                                    | Cervical Atlas/                                                    | 2539    |

|    |                                                                                             |         |
|----|---------------------------------------------------------------------------------------------|---------|
| 28 | spinal nerve roots/                                                                         | 10,825  |
| 29 | exp brachial plexus/                                                                        | 24658   |
| 30 | (odontoid* or cervical or occip* or atlant*).tw.                                            | 282283  |
| 31 | axis/ or odontoid process/                                                                  | 1777    |
| 32 | Thoracic Vertebrae/                                                                         | 20133   |
| 33 | cervical vertebrae.mp.                                                                      | 35831   |
| 34 | cervical plexus.mp.                                                                         | 1465    |
| 35 | cervical spine.mp.                                                                          | 21326   |
| 36 | (neck adj3 muscles).mp.                                                                     | 7410    |
| 37 | (brachial adj3 plexus).mp.                                                                  | 13431   |
| 38 | (thoracic adj3 vertebrae).mp.                                                               | 21124   |
| 39 | neck.mp.                                                                                    | 244594  |
| 40 | (thoracic adj3 spine).mp.                                                                   | 7024    |
| 41 | (thoracic adj3 outlet).mp.                                                                  | 2763    |
| 42 | trapezius.mp.                                                                               | 3985    |
| 43 | or/21-42                                                                                    | 566354  |
| 44 | exp pain/                                                                                   | 387369  |
| 45 | exp injuries/                                                                               | 891764  |
| 46 | pain.mp.                                                                                    | 672242  |
| 47 | ache.mp.                                                                                    | 15382   |
| 48 | sore.mp.                                                                                    | 7757    |
| 49 | stiff.mp.                                                                                   | 9236    |
| 50 | discomfort.mp.                                                                              | 42264   |
| 51 | injur*.mp.                                                                                  | 1050876 |
| 52 | neuropath*.mp.                                                                              | 140510  |
| 53 | or/44-52                                                                                    | 2242467 |
| 54 | 43 and 53                                                                                   | 135447  |
| 55 | Radiculopathy/                                                                              | 4853    |
| 56 | exp temporomandibular joint disorders/ or exp temporomandibular joint dysfunction syndrome/ | 16566   |

|    |                                                      |        |
|----|------------------------------------------------------|--------|
| 57 | myofascial pain syndromes/                           | 1627   |
| 58 | exp "Sprains and Strains"/                           | 18830  |
| 59 | exp Spinal Osteophytosis/                            | 4196   |
| 60 | exp Neuritis/                                        | 7282   |
| 61 | Polyradiculopathy/                                   | 2656   |
| 62 | exp Arthritis/                                       | 259875 |
| 63 | Fibromyalgia/                                        | 8641   |
| 64 | spondylitis/ or discitis/                            | 6486   |
| 65 | spondylosis/ or spondylolysis/ or spondylolisthesis/ | 7014   |
| 66 | radiculopathy.mp.                                    | 8529   |
| 67 | radiculitis.mp.                                      | 821    |
| 68 | temporomandibular.mp.                                | 27614  |
| 69 | myofascial pain syndrome*.mp.                        | 1967   |
| 70 | thoracic outlet syndrome*.mp.                        | 2552   |
| 71 | spinal osteophytosis.mp.                             | 3575   |
| 72 | neuritis.mp.                                         | 17471  |
| 73 | spondylosis.mp.                                      | 4358   |
| 74 | spondylitis.mp.                                      | 23814  |
| 75 | spondylolisthesis.mp.                                | 6178   |
| 76 | or/55-75                                             | 361804 |
| 77 | 43 and 76                                            | 28356  |
| 78 | exp neck/                                            | 30044  |
| 79 | exp cervical vertebrae/                              | 38618  |
| 80 | Thoracic Vertebrae/                                  | 20133  |
| 81 | neck.mp.                                             | 244594 |
| 82 | (thoracic adj3 vertebrae).mp.                        | 21124  |
| 83 | (thoracic adj3 spine).mp.                            | 7024   |
| 84 | cervical spine.mp.                                   | 21326  |
| 85 | or/78-84                                             | 302173 |
| 86 | Intervertebral Disk/                                 | 13804  |
| 87 | (disc or discs).mp.                                  | 99973  |
| 88 | (disk or disks).mp.                                  | 53273  |



|     |                                                                        |        |
|-----|------------------------------------------------------------------------|--------|
| 89  | or/86-88                                                               | 139200 |
| 90  | 85 and 89                                                              | 9454   |
| 91  | herniat*.mp.                                                           | 21849  |
| 92  | slipped.mp.                                                            | 4540   |
| 93  | prolapse*.mp.                                                          | 32528  |
| 94  | displace*.mp.                                                          | 149806 |
| 95  | degenerat*.mp.                                                         | 237832 |
| 96  | (bulge or bulged or bulging).mp.                                       | 9191   |
| 97  | or/91-96                                                               | 437364 |
| 98  | 90 and 97                                                              | 6049   |
| 99  | intervertebral disk degeneration/ or intervertebral disk displacement/ | 21747  |
| 100 | intervertebral disk displacement.mp.                                   | 1741   |
| 101 | intervertebral disc displacement.mp.                                   | 18641  |
| 102 | intervertebral disk degeneration.mp.                                   | 152    |
| 103 | intervertebral disc degeneration.mp.                                   | 4850   |
| 104 | intervertebral disk hernia.mp.                                         | 222    |
| 105 | or/99-104                                                              | 22513  |
| 106 | 85 and 105                                                             | 4166   |
| 107 | 20 or 54 or 77 or 98 or 106                                            | 156956 |
| 108 | cupping.mp.                                                            | 1754   |
| 109 | ventouse.tw.                                                           | 237    |
| 110 | exp phlebotomy/                                                        | 5704   |
| 111 | bloodletting.mp.                                                       | 2994   |
| 112 | blood letting.mp.                                                      | 349    |
| 113 | bloodletting.mp.                                                       | 2994   |
| 114 | spilled blood.mp.                                                      | 13     |
| 115 | venesection.mp.                                                        | 686    |
| 116 | or/108-115                                                             | 8424   |
| 117 | 107 and 116                                                            | 86     |

Ovid-EMBASE 1980 to 2018 Jan

DATE: 2018.01.08

|    | <b>Searches</b>                                                    | <b>Results</b> |
|----|--------------------------------------------------------------------|----------------|
| 1  | Neck Pain/                                                         | 18952          |
| 2  | brachial plexus neuropathy/                                        | 1779           |
| 3  | cervical pain.mp.                                                  | 1285           |
| 4  | neckache.mp.                                                       | 23             |
| 5  | cervicodynia.mp.                                                   | 17             |
| 6  | cervicalgia.mp.                                                    | 176            |
| 7  | brachialgia/                                                       | 262            |
| 8  | brachialgia.mp.                                                    | 368            |
| 9  | brachial neuritis.mp.                                              | 204            |
| 10 | brachial neuralgia.mp.                                             | 67             |
| 11 | neck pain.mp.                                                      | 21299          |
| 12 | neck injur*.mp.                                                    | 7234           |
| 13 | brachial plexus neuropath*.mp.                                     | 1944           |
| 14 | brachial plexus neuritis.mp.                                       | 85             |
| 15 | thoracic outlet syndrome/                                          | 2075           |
| 16 | Torticollis/                                                       | 4014           |
| 17 | exp brachial plexus neuropathies/ or exp brachial plexus neuritis/ | 1779           |
| 18 | cervico brachial neuralgia.ti,ab.                                  | 36             |
| 19 | cervicobrachial neuralgia.ti,ab.                                   | 75             |
| 20 | (monoradicul* or monoradial*).tw.                                  | 150            |
| 21 | or/1-20                                                            | 37046          |
| 22 | neck/                                                              | 50115          |
| 23 | neck muscles/                                                      | 5295           |
| 24 | cervical plexus/                                                   | 1090           |
| 25 | cervical spine/                                                    | 31073          |
| 26 | atlantoaxial joint/                                                | 1743           |
| 27 | atlantooccipital joint/                                            | 2016           |
| 28 | atlas/                                                             | 1765           |
| 29 | spinal root/                                                       | 4655           |
| 30 | brachial plexus/                                                   | 7832           |
| 31 | (odontoid* or cervical or occip* or atlant*).tw.                   | 313982         |

|    |           |                                            |
|----|-----------|--------------------------------------------|
| 1  |           |                                            |
| 2  |           |                                            |
| 3  |           |                                            |
| 4  |           |                                            |
| 5  |           |                                            |
| 6  | <b>32</b> | odontoid process/ 2481                     |
| 7  | <b>33</b> | cervical vertebra.mp. 3529                 |
| 8  | <b>34</b> | cervical vertebrae.mp. 3134                |
| 9  | <b>35</b> | cervical plexus.mp. 1403                   |
| 10 | <b>36</b> | cervical spine.mp. 48597                   |
| 11 | <b>37</b> | (neck adj3 muscles).mp. 2581               |
| 12 | <b>38</b> | (brachial adj3 plexus).mp. 17831           |
| 13 | <b>39</b> | (thoracic adj3 vertebrae).mp. 2227         |
| 14 | <b>40</b> | neck.mp. 300025                            |
| 15 | <b>41</b> | (thoracic adj3 spine).mp. 13953            |
| 16 | <b>42</b> | (thoracic adj3 outlet).mp. 2435            |
| 17 | <b>43</b> | trapezius.mp. 5264                         |
| 18 | <b>44</b> | or/22-43 622696                            |
| 19 | <b>45</b> | exp pain/ 1091658                          |
| 20 | <b>46</b> | exp injuries/ 66466                        |
| 21 | <b>47</b> | pain.mp. 1032154                           |
| 22 | <b>48</b> | ache.mp. 16783                             |
| 23 | <b>49</b> | sore.mp. 18614                             |
| 24 | <b>50</b> | stiff.mp. 11265                            |
| 25 | <b>51</b> | discomfort.mp. 64832                       |
| 26 | <b>52</b> | injur*.mp. 1377870                         |
| 27 | <b>53</b> | neuropath*.mp. 267008                      |
| 28 | <b>54</b> | or/45-53 2799546                           |
| 29 | <b>55</b> | 44 and 54 151698                           |
| 30 | <b>56</b> | Radiculopathy/ 8801                        |
| 31 | <b>57</b> | temporomandibular joint disorder/ 11910    |
| 32 | <b>58</b> | myofascial pain/ 7225                      |
| 33 | <b>59</b> | spondylosis/ or cervical spondylosis/ 6895 |
| 34 | <b>60</b> | Neuritis/ 5803                             |
| 35 | <b>61</b> | exp Arthritis/ 395884                      |
| 36 | <b>62</b> | Fibromyalgia/ 17215                        |
| 37 | <b>63</b> | exp spondylitis/ 34738                     |
| 38 |           |                                            |
| 39 |           |                                            |
| 40 |           |                                            |
| 41 |           |                                            |
| 42 |           |                                            |
| 43 |           |                                            |
| 44 |           |                                            |
| 45 |           |                                            |
| 46 |           |                                            |
| 47 |           |                                            |
| 48 |           |                                            |
| 49 |           |                                            |
| 50 |           |                                            |
| 51 |           |                                            |
| 52 |           |                                            |
| 53 |           |                                            |
| 54 |           |                                            |
| 55 |           |                                            |
| 56 |           |                                            |
| 57 |           |                                            |
| 58 |           |                                            |
| 59 |           |                                            |
| 60 |           |                                            |

|    |                                  |        |
|----|----------------------------------|--------|
| 64 | diskitis/                        | 2171   |
| 65 | spondylolisthesis/               | 7164   |
| 66 | radiculopathy.mp.                | 11998  |
| 67 | radiculitis.mp.                  | 1260   |
| 68 | temporomandibular.mp.            | 25840  |
| 69 | myofascial pain syndrome*.mp.    | 1158   |
| 70 | spinal osteophytosis.mp.         | 36     |
| 71 | neuritis.mp.                     | 19219  |
| 72 | spondylosis.mp.                  | 8026   |
| 73 | spondylitis.mp.                  | 35047  |
| 74 | spondylolisthesis.mp.            | 7954   |
| 75 | or/56-74                         | 476180 |
| 76 | 44 and 75                        | 27829  |
| 77 | neck/                            | 50115  |
| 78 | cervical spine/                  | 31073  |
| 79 | neck.mp.                         | 300025 |
| 80 | (thoracic adj3 vertebrae).mp.    | 2227   |
| 81 | (thoracic adj3 spine).mp.        | 13953  |
| 82 | cervical spine.mp.               | 48597  |
| 83 | or/77-82                         | 348878 |
| 84 | Intervertebral Disk/             | 11331  |
| 85 | (disc or discs).mp.              | 85296  |
| 86 | (disk or disks).mp.              | 97488  |
| 87 | or/84-86                         | 146518 |
| 88 | 83 and 87                        | 9652   |
| 89 | herniat*.mp.                     | 25041  |
| 90 | slipped.mp.                      | 3710   |
| 91 | prolapse*.mp.                    | 41853  |
| 92 | displace*.mp.                    | 127797 |
| 93 | degenerat*.mp.                   | 321664 |
| 94 | (bulge or bulged or bulging).mp. | 10599  |
| 95 | or/89-94                         | 520028 |

|     |                                                      |        |
|-----|------------------------------------------------------|--------|
| 96  | 88 and 95                                            | 5203   |
| 97  | intervertebral disk hernia/                          | 15253  |
| 98  | intervertebral disk degeneration/                    | 8780   |
| 99  | intervertebral disk displacement.mp.                 | 533    |
| 100 | intervertebral disc displacement.mp.                 | 131    |
| 101 | intervertebral disk degeneration.mp.                 | 8836   |
| 102 | intervertebral disc degeneration.mp.                 | 1880   |
| 103 | or/97-102                                            | 23812  |
| 104 | 83 and 103                                           | 4121   |
| 105 | 21 or 55 or 76 or 96 or 104                          | 169900 |
| 106 | cupping.mp.                                          | 1908   |
| 107 | ventouse.tw.                                         | 411    |
| 108 | exp phlebotomy/                                      | 9427   |
| 109 | bloodletting.mp.                                     | 672    |
| 110 | blood letting.mp.                                    | 315    |
| 111 | blood-letting.mp.                                    | 315    |
| 112 | spilled blood.mp.                                    | 14     |
| 113 | venesection.mp.                                      | 743    |
| 114 | 106 or 107 or 108 or 109 or 110 or 111 or 112 or 113 | 12343  |
| 115 | 105 and 114                                          | 137    |

Ovid-AMED 1985 to December 2017

Date: 2018.01.08.

|   | Searches              | Results |
|---|-----------------------|---------|
| 1 | Neck Pain/            | 1031    |
| 2 | exp Brachial plexus/  | 282     |
| 3 | cervical pain.mp.     | 75      |
| 4 | neckache.mp.          | 0       |
| 5 | cervicodynia.mp.      | 2       |
| 6 | cervicalgia.mp.       | 13      |
| 7 | brachialgia.mp.       | 6       |
| 8 | brachial neuritis.mp. | 1       |

|    |                                                     |      |
|----|-----------------------------------------------------|------|
| 9  | brachial neuralgia.mp.                              | 5    |
| 10 | neck pain.mp.                                       | 1380 |
| 11 | neck injur*.mp.                                     | 139  |
| 12 | brachial plexus neuropath*.mp.                      | 8    |
| 13 | brachial plexus neuritis.mp.                        | 1    |
| 14 | thoracic outlet syndrome/ or cervical rib syndrome/ | 43   |
| 15 | Torticollis/                                        | 70   |
| 16 | cervico brachial neuralgia.ti,ab.                   | 0    |
| 17 | cervicobrachial neuralgia.ti,ab.                    | 2    |
| 18 | (monoradicul* or monoradicl*).tw.                   | 0    |
| 19 | or/1-18                                             | 1941 |
| 20 | neck/                                               | 663  |
| 21 | neck muscles/                                       | 150  |
| 22 | exp cervical plexus/                                | 30   |
| 23 | exp cervical vertebrae/                             | 1647 |
| 24 | Atlanto axial joint/                                | 32   |
| 25 | Atlanto occipital joint/                            | 17   |
| 26 | spinal nerve roots/                                 | 92   |
| 27 | (odontoid* or cervical or occip* or atlant*).tw.    | 3929 |
| 28 | Axis/                                               | 9    |
| 29 | Odontoid process/                                   | 8    |
| 30 | Thoracic Vertebrae/                                 | 302  |
| 31 | cervical vertebrae.mp.                              | 1678 |
| 32 | cervical plexus.mp.                                 | 11   |
| 33 | cervical spine.mp.                                  | 1163 |
| 34 | (neck adj3 muscles).mp.                             | 311  |
| 35 | (brachial adj3 plexus).mp.                          | 203  |
| 36 | (thoracic adj3 vertebrae).mp.                       | 331  |
| 37 | neck.mp.                                            | 3781 |
| 38 | (thoracic adj3 spine).mp.                           | 355  |
| 39 | (thoracic adj3 outlet).mp.                          | 83   |
| 40 | trapezius.mp.                                       | 502  |
| 41 | or/20-40                                            | 7636 |

|    |                                                      |       |
|----|------------------------------------------------------|-------|
| 42 | exp pain/                                            | 20488 |
| 43 | exp injuries/                                        | 3007  |
| 44 | pain.mp.                                             | 29672 |
| 45 | ache.mp.                                             | 124   |
| 46 | sore.mp.                                             | 167   |
| 47 | stiff.mp.                                            | 228   |
| 48 | discomfort.mp.                                       | 991   |
| 49 | injur*.mp.                                           | 28051 |
| 50 | neuropath*.mp.                                       | 1781  |
| 51 | or/42-50                                             | 57325 |
| 52 | 41 and 51                                            | 4097  |
| 53 | myofascial pain syndromes/                           | 352   |
| 54 | exp "Sprains and Strains"/                           | 949   |
| 55 | exp Spinal Osteophytosis/                            | 35    |
| 56 | exp Neuritis/                                        | 62    |
| 57 | exp Arthritis/                                       | 5513  |
| 58 | Fibromyalgia/                                        | 1647  |
| 59 | spondylitis/ or discitis/                            | 77    |
| 60 | spondylosis/ or spondylolysis/ or spondylolisthesis/ | 140   |
| 61 | radiculopathy.mp.                                    | 285   |
| 62 | radiculitis.mp.                                      | 10    |
| 63 | temporomandibular.mp.                                | 582   |
| 64 | myofascial pain syndrome*.mp.                        | 424   |
| 65 | thoracic outlet syndrome*.mp.                        | 80    |
| 66 | spinal osteophytosis.mp.                             | 41    |
| 67 | neuritis.mp.                                         | 78    |
| 68 | spondylosis.mp.                                      | 130   |
| 69 | spondylitis.mp.                                      | 358   |
| 70 | spondylolisthesis.mp.                                | 154   |
| 71 | or/53-70                                             | 9763  |
| 72 | 41 and 71                                            | 794   |
| 73 | exp neck/                                            | 710   |

|     |                                                                        |      |
|-----|------------------------------------------------------------------------|------|
| 74  | exp cervical vertebrae/                                                | 1647 |
| 75  | Thoracic Vertebrae/                                                    | 302  |
| 76  | neck.mp.                                                               | 3781 |
| 77  | (thoracic adj3 vertebrae).mp.                                          | 331  |
| 78  | (thoracic adj3 spine).mp.                                              | 355  |
| 79  | cervical spine.mp.                                                     | 1163 |
| 80  | or/73-79                                                               | 5755 |
| 81  | Intervertebral Disk/                                                   | 327  |
| 82  | (disc or discs).mp.                                                    | 1209 |
| 83  | (disk or disks).mp.                                                    | 985  |
| 84  | or/81-83                                                               | 1693 |
| 85  | 80 and 84                                                              | 225  |
| 86  | herniat*.mp.                                                           | 390  |
| 87  | slipped.mp.                                                            | 27   |
| 88  | prolapse*.mp.                                                          | 122  |
| 89  | displace*.mp.                                                          | 2548 |
| 90  | degenerat*.mp.                                                         | 1676 |
| 91  | (bulge or bulged or bulging).mp.                                       | 63   |
| 92  | or/86-91                                                               | 4467 |
| 93  | 85 and 92                                                              | 141  |
| 94  | intervertebral disk degeneration/ or intervertebral disk displacement/ | 342  |
| 95  | intervertebral disk displacement.mp.                                   | 376  |
| 96  | intervertebral disc displacement.mp.                                   | 1    |
| 97  | intervertebral disk degeneration.mp.                                   | 29   |
| 98  | intervertebral disc degeneration.mp.                                   | 22   |
| 99  | intervertebral disk hernia/                                            | 0    |
| 100 | or/94-99                                                               | 414  |
| 101 | 80 and 100                                                             | 54   |
| 102 | 19 or 52 or 72 or 93 or 101                                            | 4732 |
| 103 | cupping.mp.                                                            | 173  |
| 104 | ventouse.tw.                                                           | 2    |
| 105 | exp Bloodletting/                                                      | 43   |



|     |                   |     |
|-----|-------------------|-----|
| 106 | exp Cupping/      | 101 |
| 107 | bloodletting.mp.  | 69  |
| 108 | blood letting.mp. | 30  |
| 109 | bloodletting.mp.  | 69  |
| 110 | spilled blood.mp. | 0   |
| 111 | venesection.mp.   | 0   |
| 112 | or/103-111        | 235 |
| 113 | 102 and 112       | 19  |

| Cochrane Library |                                     | Date: 2018.01.09 |
|------------------|-------------------------------------|------------------|
| Searches         |                                     | Results          |
| 1                | [mh ^"Neck pain"]                   | 845              |
| 2                | [mh "Brachial Plexus Neuropathies"] | 53               |
| 3                | cervical pain:ti,ab,kw              | 3071             |
| 4                | neckache:ti,ab,kw                   | 1                |
| 5                | cervicodynia:ti,ab,kw               | 1                |
| 6                | cervicalgia:ti,ab,kw                | 11               |
| 7                | brachialgia:ti,ab,kw                | 12               |
| 8                | brachial neuritis:ti,ab,kw          | 28               |
| 9                | brachial neuralgia:ti,ab,kw         | 17               |
| 10               | neck pain:ti,ab,kw                  | 4667             |
| 11               | neck injur*:ti,ab,kw                | 1417             |
| 12               | brachial plexus neuropath*:ti,ab,kw | 75               |
| 13               | brachial plexus neuritis:ti,ab,kw   | 28               |
| 14               | [mh ^"thoracic outlet syndrome"]    | 18               |
| 15               | [mh ^"cervical rib syndrome"]       | 1                |
| 16               | [mh ^Torticollis]                   | 98               |
| 17               | [mh "brachial plexus neuropathies"] | 53               |
| 18               | [mh "brachial plexus neuritis"]     | 25               |
| 19               | cervico brachial neuralgia:ti,ab,kw | 5                |
| 20               | cervicobrachial neuralgia:ti,ab,kw  | 115              |

|    |                                                                                                                                                        |        |
|----|--------------------------------------------------------------------------------------------------------------------------------------------------------|--------|
| 21 | monoradicul* or monoradicl*;ti,ab,kw                                                                                                                   | 26     |
| 22 | #1 or #2 or #3 or #4 or #5 or #6 or #7 or #8 or #9 or #10 or #11 or #12 or #13 or #14 or #15 or #16 or #17 or #18 or #19 or #20 or #21                 | 7525   |
| 23 | [mh ^neck]                                                                                                                                             | 486    |
| 24 | [mh ^"neck muscles"]                                                                                                                                   | 216    |
| 25 | [mh "cervical plexus"]                                                                                                                                 | 111    |
| 26 | [mh "cervical vertebrae"]                                                                                                                              | 994    |
| 27 | [mh ^"atlanto-axial joint"]                                                                                                                            | 23     |
| 28 | [mh ^"atlanto-occipital joint"]                                                                                                                        | 8      |
| 29 | [mh ^"Cervical Atlas"]                                                                                                                                 | 4      |
| 30 | [mh ^"spinal nerve roots"]                                                                                                                             | 150    |
| 31 | [mh "brachial plexus"]                                                                                                                                 | 949    |
| 32 | odontoid* or cervical or occip* or atlant*:ti,ab,kw                                                                                                    | 16822  |
| 33 | [mh ^"odontoid process"]                                                                                                                               | 11     |
| 34 | [mh ^"Thoracic Vertebrae"]                                                                                                                             | 469    |
| 35 | cervical vertebrae:ti,ab,kw                                                                                                                            | 1086   |
| 36 | cervical plexus:ti,ab,kw                                                                                                                               | 217    |
| 37 | cervical spine:ti,ab,kw                                                                                                                                | 1609   |
| 38 | neck muscles:ti,ab,kw                                                                                                                                  | 704    |
| 39 | brachial plexus:ti,ab,kw                                                                                                                               | 1237   |
| 40 | thoracic vertebrae:ti,ab,kw                                                                                                                            | 584    |
| 41 | neck:ti,ab,kw                                                                                                                                          | 15234  |
| 42 | thoracic spine:ti,ab,kw                                                                                                                                | 741    |
| 43 | thoracic outlet:ti,ab,kw                                                                                                                               | 41     |
| 44 | trapezius:ti,ab,kw                                                                                                                                     | 530    |
| 45 | #23 or #24 or #25 or #26 or #27 or #28 or #29 or #30 or #31 or #32 or #33 or #34 or #35 or #36 or #37 or #38 or #39 or #40 or #41 or #42 or #43 or #44 | 33047  |
| 46 | [mh pain]                                                                                                                                              | 39333  |
| 47 | [mh injuries]                                                                                                                                          | 19901  |
| 48 | pain:ti,ab,kw                                                                                                                                          | 107702 |
| 49 | ache:ti,ab,kw                                                                                                                                          | 298    |
| 50 | sore:ti,ab,kw                                                                                                                                          | 2106   |
| 51 | stiff:ti,ab,kw                                                                                                                                         | 296    |

|    |                                                                                                                                                                             |        |
|----|-----------------------------------------------------------------------------------------------------------------------------------------------------------------------------|--------|
| 52 | discomfort:ti,ab,kw                                                                                                                                                         | 9125   |
| 53 | injur*:ti,ab,kw                                                                                                                                                             | 39318  |
| 54 | neuropath*:ti,ab,kw                                                                                                                                                         | 8396   |
| 55 | #46 or #47 or #48 or #49 or #50 or #51 or #52 or #53 or #54                                                                                                                 | 161760 |
| 56 | #45 and #55                                                                                                                                                                 | 10128  |
| 57 | [mh ^Radiculopathy]                                                                                                                                                         | 293    |
| 58 | [mh "temporomandibular joint disorders"]                                                                                                                                    | 614    |
| 59 | [mh "temporomandibular joint dysfunction syndrome"]                                                                                                                         | 179    |
| 60 | [mh "myofascial pain syndromes"]                                                                                                                                            | 451    |
| 61 | [mh "Sprains and Strains"]                                                                                                                                                  | 999    |
| 62 | [mh "Spinal Osteophytosis"]                                                                                                                                                 | 91     |
| 63 | [mh Neuritis]                                                                                                                                                               | 70     |
| 64 | [mh ^polyradiculopathy]                                                                                                                                                     | 13     |
| 65 | [mh arthritis]                                                                                                                                                              | 10946  |
| 66 | [mh ^Fibromyalgia]                                                                                                                                                          | 842    |
| 67 | [mh ^spondylitis]                                                                                                                                                           | 20     |
| 68 | [mh ^discitis]                                                                                                                                                              | 9      |
| 69 | [mh ^spondylosis]                                                                                                                                                           | 126    |
| 70 | [mh ^spondylolysis]                                                                                                                                                         | 11     |
| 71 | [mh ^spondylolisthesis]                                                                                                                                                     | 155    |
| 72 | radiculopathy:ti,ab,kw                                                                                                                                                      | 725    |
| 73 | radiculitis:ti,ab,kw                                                                                                                                                        | 38     |
| 74 | temporomandibular:ti,ab,kw                                                                                                                                                  | 1111   |
| 75 | myofascial pain syndrome*:ti,ab,kw                                                                                                                                          | 569    |
| 76 | thoracic outlet syndrome*:ti,ab,kw                                                                                                                                          | 35     |
| 77 | spinal osteophytosis:ti,ab,kw                                                                                                                                               | 95     |
| 78 | neuritis:ti,ab,kw                                                                                                                                                           | 550    |
| 79 | spondylosis:ti,ab,kw                                                                                                                                                        | 411    |
| 80 | spondylitis:ti,ab,kw                                                                                                                                                        | 1395   |
| 81 | spondylolisthesis:ti,ab,kw                                                                                                                                                  | 460    |
| 82 | #57 or #58 or #59 or #60 or #61 or #62 or #63 or #64 or #65 or #66 or #67 or #68 or #69 or #70 or #71 or #72 or #73 or #74 or #75 or #76 or #77 or #78 or #79 or #80 or #81 | 17164  |

|    |            |                                                           |
|----|------------|-----------------------------------------------------------|
| 1  |            |                                                           |
| 2  |            |                                                           |
| 3  |            |                                                           |
| 4  |            |                                                           |
| 5  |            |                                                           |
| 6  | <b>83</b>  | #45 and #82 1519                                          |
| 7  | <b>84</b>  | [mh neck] 486                                             |
| 8  | <b>85</b>  | [mh "cervical vertebrae"] 994                             |
| 9  |            |                                                           |
| 10 | <b>86</b>  | [mh ^"thoracic vertebrae"] 469                            |
| 11 |            |                                                           |
| 12 | <b>87</b>  | neck:ti,ab,kw 15234                                       |
| 13 |            |                                                           |
| 14 | <b>88</b>  | thoracic vertebrae:ti,ab,kw 584                           |
| 15 |            |                                                           |
| 16 | <b>89</b>  | thoracic spine:ti,ab,kw 741                               |
| 17 | <b>90</b>  | cervical spine:ti,ab,kw 1609                              |
| 18 |            |                                                           |
| 19 | <b>91</b>  | #84 or #85 or #86 or #87 or #88 or #89 or #90 14188       |
| 20 | <b>92</b>  | [mh ^"Intervertebral Disk"] 271                           |
| 21 |            |                                                           |
| 22 | <b>93</b>  | disc\$:ti,ab,kw 3867                                      |
| 23 |            |                                                           |
| 24 | <b>94</b>  | #92 or #93 3867                                           |
| 25 | <b>95</b>  | #91 and #94 541                                           |
| 26 |            |                                                           |
| 27 | <b>96</b>  | herniat*:ti,ab,kw 1225                                    |
| 28 |            |                                                           |
| 29 | <b>97</b>  | slipped:ti,ab,kw 49                                       |
| 30 |            |                                                           |
| 31 | <b>98</b>  | prolapse*:ti,ab,kw 1996                                   |
| 32 | <b>99</b>  | displace*:ti,ab,kw 4124                                   |
| 33 |            |                                                           |
| 34 | <b>100</b> | degenerat*:ti,ab,kw 5989                                  |
| 35 | <b>101</b> | bulge or bulged or bulging:ti,ab,kw 279                   |
| 36 |            |                                                           |
| 37 | <b>102</b> | #96 or #97 or #98 or #99 or #100 or #101 12784            |
| 38 |            |                                                           |
| 39 | <b>103</b> | #95 and #102 372                                          |
| 40 | <b>104</b> | [mh ^"intervertebral disk degeneration"] 205              |
| 41 |            |                                                           |
| 42 | <b>105</b> | [mh ^"intervertebral disk displacement"] 746              |
| 43 |            |                                                           |
| 44 | <b>106</b> | intervertebral disk displacement:ti,ab,kw 247             |
| 45 | <b>107</b> | intervertebral disc displacement:ti,ab,kw 812             |
| 46 |            |                                                           |
| 47 | <b>108</b> | intervertebral disk degeneration:ti,ab,kw 238             |
| 48 | <b>109</b> | intervertebral disc degeneration:ti,ab,kw 416             |
| 49 |            |                                                           |
| 50 | <b>110</b> | intervertebral disk hernia 419                            |
| 51 |            |                                                           |
| 52 | <b>111</b> | #104 or #105 or #106 or #107 or #108 or #109 or #110 1529 |
| 53 |            |                                                           |
| 54 | <b>112</b> | #91 and #111 277                                          |
| 55 | <b>113</b> | #112 or #103 or #83 or #56 or #22 11540                   |
| 56 |            |                                                           |
| 57 | <b>114</b> | cupping:ti,ab,kw 340                                      |
| 58 |            |                                                           |
| 59 | <b>115</b> | ventouse:ti,ab,kw 56                                      |
| 60 |            |                                                           |

|     |                                                              |     |
|-----|--------------------------------------------------------------|-----|
| 116 | MeSH descriptor: [Bloodletting] explode all trees            | 100 |
| 117 | bloodletting:ti,ab,kw                                        | 159 |
| 118 | blood letting:ti,ab,kw                                       | 77  |
| 119 | blood-letting:ti,ab,kw                                       | 72  |
| 120 | spilled blood:ti,ab,kw                                       | 6   |
| 121 | venesection:ti,ab,kw                                         | 60  |
| 122 | #114 or #115 or #116 or #117 or #118 or #119 or #120 or #121 | 596 |
| 123 | #113 and #122                                                | 43  |

### CHINA Academic Journals Full-text Database

(SU='颈痛'OR SU='颈肩痛'OR SU='颈椎病' OR SU='颈肩部'OR SU='颈椎间盘突出症' OR SU='颈部'OR SU='神经根型颈椎病') AND (SU='罐' OR SU='cupping') AND (SU='随机' or SU='对照') 193

### Korean databases

| KoreaMed (Date : 2018.01.11) |                       |   |
|------------------------------|-----------------------|---|
| 1                            | 경항통 and 부항            | 0 |
| 2                            | neck pain and cupping | 0 |
| 3                            | 頸項痛 and 罐             | 0 |
|                              |                       |   |

| KMBASE (Date : 2018.01.11) |                       |   |
|----------------------------|-----------------------|---|
| 1                          | 경항통 and 부항            | 0 |
| 2                          | neck pain and cupping | 0 |

|   |           |   |
|---|-----------|---|
| 3 | 頸項痛 and 罐 | 0 |
|   |           |   |

| OASIS (Date : 2018.01.11) |                       |   |
|---------------------------|-----------------------|---|
| 1                         | 경항통 and 부항            | 0 |
| 2                         | neck pain and cupping | 0 |
| 3                         | 頸項痛 and 罐             | 0 |
|                           |                       |   |

| NDSL (Date : 2018.1.11) |                       |    |
|-------------------------|-----------------------|----|
| 1                       | 경항통 and 부항            | 0  |
| 2                       | neck pain and cupping | 37 |
| 3                       | 頸項痛 and 罐             | 0  |
|                         |                       |    |

| KISS (Date : 2018. 01. 11) |                       |   |
|----------------------------|-----------------------|---|
| 1                          | 경항통 and 부항            | 0 |
| 2                          | neck pain and cupping | 5 |
| 3                          | 頸項痛 and 罐             | 5 |
|                            |                       |   |

### Japan database

| J-stage (Date : 2018. 01. 11) |                   |    |
|-------------------------------|-------------------|----|
| 1                             | neck pain cupping | 15 |
|                               |                   |    |

| 医学中央雑誌刊行会(Ichushi)(Date : 2018. 01. 11) |                                               |        |
|-----------------------------------------|-----------------------------------------------|--------|
| #1                                      | (頸椎症性脊髄症/TH or 頸椎症/AL)                        | 10,553 |
| #2                                      | 頸椎椎間板ヘルニア/AL                                  | 1,077  |
| #3                                      | ((@頸椎/TH and @脊椎損傷/TH and @捻挫/TH) or 頸椎捻挫/AL) | 327    |
| #4                                      | (頸部痛/TH or 頸部疼痛/AL)                           | 2,188  |
| #6                                      | 頸肩部痛/AL                                       | 64     |
| #7                                      | #1 or #2 or #3 or #4 or #5 or #6              | 13,698 |
| #8                                      | cupping/AL                                    | 38     |
| #9                                      | 吸角/AL                                         | 30     |
| #10                                     | #8 or #9                                      | 66     |
| #11                                     | #7 AND #10                                    | 1      |

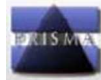

# PRISMA 2009 Checklist

| Section/topic                      | #  | Checklist item                                                                                                                                                                                                                                                                                              | Reported on page # |
|------------------------------------|----|-------------------------------------------------------------------------------------------------------------------------------------------------------------------------------------------------------------------------------------------------------------------------------------------------------------|--------------------|
| <b>TITLE</b>                       |    |                                                                                                                                                                                                                                                                                                             |                    |
| Title                              | 1  | Identify the report as a systematic review, meta-analysis, or both.                                                                                                                                                                                                                                         | 1                  |
| <b>ABSTRACT</b>                    |    |                                                                                                                                                                                                                                                                                                             |                    |
| Structured summary                 | 2  | Provide a structured summary including, as applicable: background; objectives; data sources; study eligibility criteria, participants, and interventions; study appraisal and synthesis methods; results; limitations; conclusions and implications of key findings; systematic review registration number. | 2                  |
| <b>INTRODUCTION</b>                |    |                                                                                                                                                                                                                                                                                                             |                    |
| Rationale                          | 3  | Describe the rationale for the review in the context of what is already known.                                                                                                                                                                                                                              | 4                  |
| Objectives                         | 4  | Provide an explicit statement of questions being addressed with reference to participants, interventions, comparisons, outcomes, and study design (PICOS).                                                                                                                                                  | 4-5                |
| <b>METHODS</b>                     |    |                                                                                                                                                                                                                                                                                                             |                    |
| Protocol and registration          | 5  | Indicate if a review protocol exists, if and where it can be accessed (e.g., Web address), and, if available, provide registration information including registration number.                                                                                                                               | 5                  |
| Eligibility criteria               | 6  | Specify study characteristics (e.g., PICOS, length of follow-up) and report characteristics (e.g., years considered, language, publication status) used as criteria for eligibility, giving rationale.                                                                                                      | 5                  |
| Information sources                | 7  | Describe all information sources (e.g., databases with dates of coverage, contact with study authors to identify additional studies) in the search and date last searched.                                                                                                                                  | 5                  |
| Search                             | 8  | Present full electronic search strategy for at least one database, including any limits used, such that it could be repeated.                                                                                                                                                                               | Appendix 1         |
| Study selection                    | 9  | State the process for selecting studies (i.e., screening, eligibility, included in systematic review, and, if applicable, included in the meta-analysis).                                                                                                                                                   | 5                  |
| Data collection process            | 10 | Describe method of data extraction from reports (e.g., piloted forms, independently, in duplicate) and any processes for obtaining and confirming data from investigators.                                                                                                                                  | 5-6                |
| Data items                         | 11 | List and define all variables for which data were sought (e.g., PICOS, funding sources) and any assumptions and simplifications made.                                                                                                                                                                       | 5-6                |
| Risk of bias in individual studies | 12 | Describe methods used for assessing risk of bias of individual studies (including specification of whether this was done at the study or outcome level), and how this information is to be used in any data synthesis.                                                                                      | 5-6, 11            |
| Summary measures                   | 13 | State the principal summary measures (e.g., risk ratio, difference in means).                                                                                                                                                                                                                               | 6                  |
| Synthesis of results               | 14 | Describe the methods of handling data and combining results of studies, if done, including measures of consistency (e.g., $I^2$ ) for each meta-analysis.                                                                                                                                                   | 6                  |



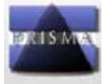

# PRISMA 2009 Checklist

Page 1 of 2

| Section/topic                 | #  | Checklist item                                                                                                                                                                                           | Reported on page # |
|-------------------------------|----|----------------------------------------------------------------------------------------------------------------------------------------------------------------------------------------------------------|--------------------|
| Risk of bias across studies   | 15 | Specify any assessment of risk of bias that may affect the cumulative evidence (e.g., publication bias, selective reporting within studies).                                                             | 6                  |
| Additional analyses           | 16 | Describe methods of additional analyses (e.g., sensitivity or subgroup analyses, meta-regression), if done, indicating which were pre-specified.                                                         | 6                  |
| <b>RESULTS</b>                |    |                                                                                                                                                                                                          |                    |
| Study selection               | 17 | Give numbers of studies screened, assessed for eligibility, and included in the review, with reasons for exclusions at each stage, ideally with a flow diagram.                                          | 7, Figure 1        |
| Study characteristics         | 18 | For each study, present characteristics for which data were extracted (e.g., study size, PICOS, follow-up period) and provide the citations.                                                             | 7, Table 1         |
| Risk of bias within studies   | 19 | Present data on risk of bias of each study and, if available, any outcome level assessment (see item 12).                                                                                                | 11<br>Figure 2     |
| Results of individual studies | 20 | For all outcomes considered (benefits or harms), present, for each study: (a) simple summary data for each intervention group (b) effect estimates and confidence intervals, ideally with a forest plot. | 11-13              |
| Synthesis of results          | 21 | Present results of each meta-analysis done, including confidence intervals and measures of consistency.                                                                                                  | 11-13              |
| Risk of bias across studies   | 22 | Present results of any assessment of risk of bias across studies (see Item 15).                                                                                                                          | 11<br>Figure 2     |
| Additional analysis           | 23 | Give results of additional analyses, if done (e.g., sensitivity or subgroup analyses, meta-regression [see Item 16]).                                                                                    | 11-13              |
| <b>DISCUSSION</b>             |    |                                                                                                                                                                                                          |                    |
| Summary of evidence           | 24 | Summarize the main findings including the strength of evidence for each main outcome; consider their relevance to key groups (e.g., healthcare providers, users, and policy makers).                     | 15                 |
| Limitations                   | 25 | Discuss limitations at study and outcome level (e.g., risk of bias), and at review-level (e.g., incomplete retrieval of identified research, reporting bias).                                            | 16                 |
| Conclusions                   | 26 | Provide a general interpretation of the results in the context of other evidence, and implications for future research.                                                                                  | 16-17              |
| <b>FUNDING</b>                |    |                                                                                                                                                                                                          |                    |
| Funding                       | 27 | Describe sources of funding for the systematic review and other support (e.g., supply of data); role of funders for the systematic review.                                                               | 17                 |

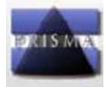

# PRISMA 2009 Checklist

For more information, visit: [www.prisma-statement.org](http://www.prisma-statement.org).

For peer review only

1  
2  
3  
4  
5  
6  
7  
8  
9  
10  
11  
12  
13  
14  
15  
16  
17  
18  
19  
20  
21  
22  
23  
24  
25  
26  
27  
28  
29  
30  
31  
32  
33  
34  
35  
36  
37  
38  
39  
40  
41  
42  
43  
44  
45  
46  
47

# BMJ Open

## Is cupping therapy effective in neck pain patients? A systematic review and meta-analysis

|                                 |                                                                                                                                                                                                                                                                                                                                                                                                                                                                                                                                                                                                                                                                                                                                                                                                                                                                                                                                                                               |
|---------------------------------|-------------------------------------------------------------------------------------------------------------------------------------------------------------------------------------------------------------------------------------------------------------------------------------------------------------------------------------------------------------------------------------------------------------------------------------------------------------------------------------------------------------------------------------------------------------------------------------------------------------------------------------------------------------------------------------------------------------------------------------------------------------------------------------------------------------------------------------------------------------------------------------------------------------------------------------------------------------------------------|
| Journal:                        | <i>BMJ Open</i>                                                                                                                                                                                                                                                                                                                                                                                                                                                                                                                                                                                                                                                                                                                                                                                                                                                                                                                                                               |
| Manuscript ID                   | bmjopen-2017-021070.R2                                                                                                                                                                                                                                                                                                                                                                                                                                                                                                                                                                                                                                                                                                                                                                                                                                                                                                                                                        |
| Article Type:                   | Research                                                                                                                                                                                                                                                                                                                                                                                                                                                                                                                                                                                                                                                                                                                                                                                                                                                                                                                                                                      |
| Date Submitted by the Author:   | 06-Jul-2018                                                                                                                                                                                                                                                                                                                                                                                                                                                                                                                                                                                                                                                                                                                                                                                                                                                                                                                                                                   |
| Complete List of Authors:       | <p>Kim, Seoyoun; Jaseng Medical Foundation, Jaseng Spine and Joint Research Institute; Korea University, Graduate school of Public Health<br/> Lee, Sook-Hyun; Jaseng Medical Foundation, Jaseng Spine and Joint Research Institute<br/> Kim, Me-riong; Kyung Hee University, Department of Preventive Medicine, College of Korean Medicine<br/> Kim, Eun-jung; Dongguk University, Dept. of Acupuncture &amp; Moxibustion, College of Korean Medicine<br/> Hwang, Deok-Sang; Kyung Hee University, Department of Korean Medicine Obstetrics &amp; Gynecology, College of Korean Medicine<br/> Lee, Jinho; Jaseng Medical Foundation, Jaseng Spine and Joint Research Institute<br/> Shin, Joon-Shik; Jaseng Medical Foundation, Jaseng Spine and Joint Research Institute<br/> Ha, In-Hyuk; Kyung Hee University, Department of Preventive Medicine, College of Korean Medicine<br/> Lee, Yoon Jae; Jaseng Medical Foundation, Jaseng Spine and Joint Research Institute</p> |
| <b>Primary Subject Heading</b>: | Complementary medicine                                                                                                                                                                                                                                                                                                                                                                                                                                                                                                                                                                                                                                                                                                                                                                                                                                                                                                                                                        |
| Secondary Subject Heading:      | Rehabilitation medicine                                                                                                                                                                                                                                                                                                                                                                                                                                                                                                                                                                                                                                                                                                                                                                                                                                                                                                                                                       |
| Keywords:                       | Neck pain, Complementary Therapies, Meta-Analysis, Systematic Review                                                                                                                                                                                                                                                                                                                                                                                                                                                                                                                                                                                                                                                                                                                                                                                                                                                                                                          |
|                                 |                                                                                                                                                                                                                                                                                                                                                                                                                                                                                                                                                                                                                                                                                                                                                                                                                                                                                                                                                                               |

SCHOLARONE™  
Manuscripts

## Is cupping therapy effective in neck pain patients? A systematic review and meta-analysis

Seoyoun Kim ([scheffer@korea.ac.kr](mailto:scheffer@korea.ac.kr)),<sup>1,2</sup> Sook-Hyun Lee ([sh00god@khu.ac.kr](mailto:sh00god@khu.ac.kr)),<sup>1</sup> Me-riong Kim ([krmkmr@naver.com](mailto:krmkmr@naver.com)),<sup>3</sup> Eun-Jung Kim ([hanijjung@naver.com](mailto:hanijjung@naver.com)),<sup>4</sup> Deok-Sang Hwang ([soulhus@gmail.com](mailto:soulhus@gmail.com)),<sup>5</sup> Jinho Lee ([jasengjsr@gmail.com](mailto:jasengjsr@gmail.com)),<sup>1</sup> Joon-Shik Shin ([Jasengmaster@gmail.com](mailto:Jasengmaster@gmail.com)),<sup>1</sup> In-Hyuk Ha ([hanihata@gmail.com](mailto:hanihata@gmail.com)),<sup>3</sup> Yoon Jae Lee ([goodsmile8119@gmail.com](mailto:goodsmile8119@gmail.com))<sup>1\*</sup>

<sup>1</sup>Jaseng Spine and Joint Research Institute, Jaseng Medical Foundation, Seoul, Republic of Korea

<sup>2</sup>Graduate School of Public Health, Korea University, Seoul, Republic of Korea

<sup>3</sup>Department of Preventive Medicine, College of Korean Medicine, Kyung Hee University, Seoul, Republic of Korea

<sup>4</sup>Department of Acupuncture & Moxibustion, College of Korean Medicine, Dongguk University, Gyeongju, Republic of Korea

<sup>5</sup>Department of Korean Medicine Obstetrics & Gynecology, College of Korean Medicine, Kyung Hee University, Seoul, Republic of Korea

### \*Corresponding author

Yoon Jae Lee

Jaseng Spine and Joint Research Institute

Jaseng Medical Foundation

3F Jung-il Bldg, 538 Gangnam-daero, Gangnam-gu, Seoul, Republic of Korea 06110

E-mail: [goodsmile8119@gmail.com](mailto:goodsmile8119@gmail.com)

Tel: +82 2 2222 2745

Fax: +82 2 546 3854

## ABSTRACT

**Objectives:** Neck pain is a significant condition that is second only to depression as a cause of years lived with disability worldwide. Thus, identifying and understanding effective treatment modalities for neck pain is of heightened importance. This systematic review aimed to investigate the effects of cupping on neck pain from the current literature.

**Design:** Systematic review and meta-analysis of randomised controlled trials (RCTs)

**Setting:** Nine databases, including Chinese, Korean, and Japanese databases, were searched for data up to January 2018 with no restrictions on publication language

**Participants:** Neck pain patients

**Interventions:** Cupping therapy as the sole or add-on intervention compared with no treatment or active controls

**Primary and secondary outcome measures:** Pain severity, functional disability, and quality of life

**Results:** Eighteen RCTs were selected. Compared with the no intervention group, the cupping group exhibited significant reduction in pain (mean difference [MD] -2.42 [95% CI -3.98 to -0.86]) and improvement in function (MD -4.34 [95% CI -6.77 to -1.19]). Compared with the active control, the cupping group reported significant reduction in pain ( $P=0.0009$ ) and significantly improved quality of life ( $P=0.001$ ). The group that received control treatment with cupping therapy (add-on group) displayed significant pain reduction compared to the active control group ( $P=0.001$ ). Of the eighteen studies, only eight reported occurrence of adverse events, which were mostly mild and temporary.

**Conclusions:** Cupping was found to reduce neck pain in patients compared to no intervention or active control groups, or as an add-on treatment. Depending on the type of control group, cupping was also associated with significant improvement in terms of function and quality of life; however, due to the low quality of evidence of the included studies, definitive conclusions could not be drawn from this review. Future well-designed studies are needed to substantiate the effectiveness of cupping on neck pain.

**Keywords:** Neck Pain, Complementary Therapies, Meta-Analysis, Systematic Review

**ARTICLE SUMMARY****Strengths and limitations of this study**

- This systematic review investigated the effectiveness of cupping in treating pain, and placed no restrictions on publication language.
- This study employed stringent inclusion and exclusion criteria, and nine databases were accordingly searched for randomised controlled trials.
- The analysis addressed functional improvement, quality of life and safety of cupping, and risk of bias and levels of evidence.
- The results of data synthesis may be limited due to the heterogeneity and low quality of evidence of selected studies.

## INTRODUCTION

A recent World Health Organization study of the 20 major causes of years lived with disability (YLD) from 2000 to 2012 worldwide reported that neck pain is the second leading cause of YLD.<sup>1</sup> One study of patients in the Netherlands showed that neck pain was associated with 1% of total medical expenditure and 0.1% of gross domestic product (GDP), 77% of which was comprised of indirect medical expenses associated with absence from work or disability expenses.<sup>2</sup> Prevalence of neck pain is directly associated with escalated medical costs and negative impact on productivity, potentially increasing long-term absences from work. The lifelong prevalence of neck pain in adults ranges from 14.2% to 71%, although this rate varies greatly across studies.<sup>3</sup> Neck pain can easily progress to chronic conditions, with approximately 25% to 60% of patients developing chronic back or neck pain within the first year.<sup>4</sup> Additionally, neck pain is reported to be most prevalent in high activity age groups, particularly individuals aged 35 to 49 years,<sup>5</sup> and is also more common in women.<sup>3</sup>

Standard first-line therapy for neck pain can be largely divided into pharmacological and non-pharmacological therapies. Pharmacological treatment frequently involves use of acetaminophen and nonsteroidal anti-inflammatory drugs (NSAIDs). However, acetaminophen and NSAIDs are known to increase risk of reduced liver function, liver failure, and haemorrhagic gastritis,<sup>6</sup> and side effects may be more common when these drugs are used long-term for chronic neck pain. For these reasons, many studies have investigated the clinical effectiveness of complementary and alternative medicine therapies, including acupuncture for chronic pain conditions.<sup>7</sup>

One type of complementary therapy that can be used for neck pain is cupping. Cupping is a physical treatment, typically used by acupuncturists and other complementary and alternative medicine therapists, that utilizes glass or plastic cups placed on the skin over a painful area or acupuncture point to create negative pressure through suction. The rationale for use of cupping is not yet fully understood; it is described as a detoxification process by which waste matter and toxins are removed, and as a harmonization process for the imbalance of Qi, a traditional Chinese medicine term for “vital energy”.<sup>8</sup> Cupping has been used globally for several thousand years, particularly in countries such as Egypt and China.<sup>8</sup> Today, cupping is widely used as a holistic treatment in Europe for inpatient care and the prevention and treatment of various disorders, as well as for promotion of general health.<sup>9</sup> In South Korea, cupping is a popular treatment, and is covered by national health insurance; in 2013 alone, insurance claims for cupping reached a total 215 billion Korean won.<sup>10</sup>

There are two types of cupping: dry and wet. Dry cupping is a technique in which cups are applied to the skin to create a vacuum for suction without drawing blood, whereas in wet cupping, blood is drawn with scarification before applying the cups for blood-letting. Cupping therapy is used for post-stroke rehabilitation and hypertension, and has been reported to be effective for treating pain and musculoskeletal disorders.<sup>11 12</sup> A systematic literature review published by Yuan et al. in 2015 reviewed the effects of cupping on neck pain, reporting that cupping is effective for reducing pain and improving function.<sup>13</sup> However, only articles published up to 2013 were included in that review, and as new clinical trials investigating cupping for neck pain have since been published, an updated systematic review on the topic is needed. Moreover, Yuan et al.<sup>13</sup> restricted the publication language to include only English and Chinese language articles.

Therefore, the aim of this study was to assess current evidence of cupping for neck pain and better understand its effects on pain, function, quality of life (QoL), and safety through the review of randomised control trials (RCTs). To conduct a more extensive review, no restrictions were placed on publication language, and studies in English, Korean, Japanese, and Chinese were included.

## METHODS

The protocol of this systematic literature review was registered in the PROSPERO international prospective register of systematic reviews (CRD42016047218). This review was performed and reported in adherence with the Preferred Reporting Items for Systematic Reviews and Meta Analyses (PRISMA).<sup>14</sup>

### Literature search

Studies that used cupping as an intervention for neck pain were searched in the Ovid-Medline (1946 to Jan 2018), Ovid-EMBASE (1980 to Jan 2018), Ovid-AMED (1985 to Dec 2017), and the Cochrane Central Register of Controlled Trials (CENTRAL) up to January 9, 2018. The Chinese database China National Knowledge Infrastructure (CNKI), Korean databases Oriental Medicine Advanced Searching Integrated System (OASIS) and National Discovery for Science Leaders (NDSL), and Japanese databases J-stage and ISHUSHI were also used. Search terms included a combination of Medical Subject Headings (MeSH) terms such as neck pain (e.g., neck pain, cervical spondylosis, cervical radiculopathy, cervical disc herniation, and myofascial pain syndrome) and cupping. Details of the search strategy are presented in Appendix 1. The publication language of study articles was not restricted.

### Study inclusion and exclusion

Two or more investigators (YJL, SYK, and/or SHL) independently selected articles for analysis from the searched articles. After excluding duplicate publications, titles and abstracts were reviewed to primarily screen for articles according to the inclusion and exclusion criteria. The full texts of these articles were then reviewed for secondary screening of articles per inclusion and exclusion criteria. Only RCTs were considered. Any disagreement in the study selection process was resolved by discussion, and when an agreement was not reached, a third investigator intervened to reach consensus. Study subjects included adult patients with neck pain, including neck pain with neuropathy, and the authors did not discriminate between acute and chronic phases of neck pain. However, post-traumatic pain caused by whiplash or sports injuries was excluded as the natural history of neck pain may differ in such cases. Furthermore, patients with myelopathy or cervical headache/vertigo without neck pain were also excluded. All types of cupping therapies were included without restriction regarding dry or wet cupping, and the type of cupping device was not limited. Control groups included patients who underwent usual care for neck pain, such as physical therapy, NSAIDs, heat pack therapy, and acupuncture,<sup>15-17</sup> as well as inactive controls, such as waiting lists or no intervention groups. The outcome variables assessing the effectiveness of cupping included pain intensity, neck disability indexes, and quality of life. Pain intensity was measured using the visual analogue scale (VAS), the McGill Pain Questionnaire, and the



Northwick Park Neck Pain Questionnaire (NPQ). The Neck Disability Index (NDI) was generally used to evaluate neck function disability. QoL was assessed using the 36-item Short-form (SF-36) and EuroQol-5 Dimension (EQ-5D) questionnaires. However, studies that did not use objective instruments and reported outcomes in terms of improvement rates without standards, and investigations that used instruments without confirmation of reliability and validity were excluded.

### **Risk of bias evaluation and data extraction**

Risk of bias in the RCTs was assessed by seven categories according to the Cochrane Risk of Bias. Studies that used appropriate methods for each item and specified the methods in the text were considered to have low risk of bias; studies that did not perform the relevant item or used inappropriate methods were considered to have high risk of bias; and studies that did not mention specific methods or used ambiguous expressions to describe the methods for each item were considered to have an unclear risk of bias. Two or more investigators independently assessed all research data, and disagreements were resolved through discussion. When an agreement could not be reached, a third investigator intervened to reach consensus. Two reviewers independently read the full text of all articles and extracted data according to a pre-determined format. Any disagreements were resolved by discussion between the two reviewers.

### **Data analysis**

A meta-analysis was performed using quantitative data from each study to assess the effectiveness of cupping. The mean difference (MD) and 95% confidence intervals (CIs) were calculated using the Cochrane Collaboration software (Review Manager [RevMan] version 5.3, Copenhagen: The Nordic Cochrane Centre) for Windows (Microsoft Corporation, Redmond, WA, USA). Heterogeneity across studies was assessed using the  $\chi^2$  (chi-squared) test with a significance level of  $P < 0.10$  and  $I^2$  statistics. When heterogeneity was statistically significant, the cause of heterogeneity was analysed through subgroup analysis. Sensitivity analyses were also conducted to test the robustness of results by determining the impact of a single study on overall results. If statistical heterogeneity was found, sensitivity analyses (by eliminating one study at a time) were performed to explore possible reasons for the heterogeneity. A random effect model was applied, and publication bias was not assessed when the number of studies in the group was  $< 10$ .

### **Quality of evidence**

The quality of evidence for each outcome was assessed in accordance with the Grading of Recommendations, Assessment, Development, and Evaluation (GRADE). Quality of evidence was classified into high, moderate, low, and very low. To determine the quality of evidence, the following domains were assessed according to the standards suggested by the GRADE group: risk of bias, imprecision, inconsistency, indirectness, publication bias, large magnitude of effect, dose-response, and confounding.<sup>18</sup>

### **Patient and Public Involvement**

1  
2  
3  
4 Patients and public were not involved in the development of the research question and outcome measures or  
5 design of this study, or recruitment to and conduct of the study as a systematic review and meta-analysis. There  
6 are no plans for the results to be disseminated directly to study participants.  
7

## 8 9 **RESULTS**

### 10 **Search results**

11  
12 A total of 541 articles were retrieved, including 86 from Ovid-Medline, 137 from Ovid-EMBASE, 19 from  
13 Ovid-AMED, 43 from the Cochrane Library, 193 from a Chinese database, 47 from Korean databases and 16  
14 from Japanese databases. Following the first and second rounds of screening, a total of 18 articles were selected  
15 for review. The search results are shown in Figure 1.  
16  
17

### 18 **Features of the included studies**

19  
20 A total of 18 studies were analysed in two separate analyses<sup>19-36</sup>: direct comparison of the cupping (sole) and  
21 control groups; and an add-on analysis comparing the control with cupping group with the control only group.  
22 Two studies used three groups; 15 studies were included in the sole analysis while five studies were included in  
23 the add-on analysis.  
24

25 Seven<sup>19 21 23 26-28 34</sup> of the 18 studies used wet cupping while eleven studies used dry cupping. The frequency of  
26 cupping therapy varied greatly. Two studies performed only one round of therapy, and four conducted two to  
27 four rounds. The majority of studies conducted >10 rounds of therapy because most patients who were treated  
28 had neck pain with radiculopathy or chronic neck pain. The region of administration was typically the upper  
29 shoulder and neck area, and cupping was primarily administered to Ashi or other proximal acupoints. As these  
30 studies mainly treated pain, most presented pain scores in the form of VAS scores; disability was presented in  
31 NDI scores, while QoL was mostly reflected in responses to the EQ-5D and SF-36 questionnaires. The features  
32 of each study are presented in Table 1.  
33  
34  
35  
36  
37  
38  
39  
40  
41  
42  
43  
44  
45  
46  
47  
48  
49  
50  
51  
52  
53  
54

Table 1. Characteristics of the included studies

| Study ID                                | Country | Disease                                                  | Number of participants | Age (years, mean±SD)            | Methods of Intervention | Comparison                 | Cupping sites                                                                                    | Number of cupping | Follow up period           | Relevant             |
|-----------------------------------------|---------|----------------------------------------------------------|------------------------|---------------------------------|-------------------------|----------------------------|--------------------------------------------------------------------------------------------------|-------------------|----------------------------|----------------------|
| <b>Cupping vs. Control (Sole)</b>       |         |                                                          |                        |                                 |                         |                            |                                                                                                  |                   |                            |                      |
| <i>vs. waitlist (no intervention)</i>   |         |                                                          |                        |                                 |                         |                            |                                                                                                  |                   |                            |                      |
| Arslan 2015                             | Turkey  | computer users diagnosed minimum 3 neck pain             | EG: 20, CG: 20         | EG: 26.0±3.5, CG: 26.0±3.8      | Dry cupping (moving)    | no intervention            | upper shoulder and neck region                                                                   | 10                | After treatment            | VAS                  |
| Chi 2016                                | Taiwan  | work-related chronic neck shoulder pain                  | EG: 30, CG: 30         | EG: 43.6±6.3, CG: 42.5±5.8      | Dry cupping             | no intervention            | SI15, GB21, LI15                                                                                 | 1                 | After treatment            | VAS                  |
| Lauche 2011                             | Germany | chronic nonspecific neck pain                            | EG: 22, CG: 24         | EG: 26.1±4.2, CG: 25.1±3.0      | Dry cupping             | Waiting list control group | descending and transverse parts of the trapezius muscle                                          | 5                 | After treatment            | VAS, NDI, SF-36      |
| Saha 2017                               | Germany | Chronic neck pain                                        | EG: 25, CG: 25         | EG: 54.3 ± 8.6, CG: 53.3 ± 11.1 | Dry cupping             | Waiting list control group | from the occiput towards the mid-level thoracic spine as well as over the upper trapezius muscle | 5                 | Post-cupping after weeks 3 | VAS, POM, NDI, SF-36 |
| Lauche 2012                             | Germany | chronic nonspecific neck pain                            | EG: 22, CG: 23         | EG: 54.8±3.2, CG: 29.3±2.9      | Wet cupping             | Waiting list control group | descending parts of the trapezius muscle                                                         | 1                 | Post-cupping after days 3  | VAS, NDI, SF-36      |
| <i>vs. active control (dry cupping)</i> |         |                                                          |                        |                                 |                         |                            |                                                                                                  |                   |                            |                      |
| Sui 2008*                               | China   | cervical radiculopathy                                   | EG: 120, CG: 120       | NR                              | Dry cupping (moving)    | traction                   | Acupoints at Bladder Meridian and Vessel Governor                                                | 20                | After treatment            | VAS, POM, NDI, SF-36 |
| Cramer 2011                             | Germany | nonspecific neck pain for at least the previous 3 months | EG: 24 CG: 24          | EG: 44.46, CG: 47.88            | Dry cupping             | Standard Medical Care      | Neck and shoulder lesion                                                                         | 3-4               | After treatment            | VAS, NDI, SF-36      |

| Study ID                                               | Country              | Disease                        | Number of participants | Age (years, mean±SD)                   | Methods of Intervention       | Comparison                         | Cupping sites                                                                                                                                           | Number of cupping | Follow up period | Relevant                        |
|--------------------------------------------------------|----------------------|--------------------------------|------------------------|----------------------------------------|-------------------------------|------------------------------------|---------------------------------------------------------------------------------------------------------------------------------------------------------|-------------------|------------------|---------------------------------|
| Kim 2012                                               | Korea                | VDT workers with neck pain     | EG: 20 CG: 20          | EG : 25.5 (median)<br>CG : 28 (median) | Dry cupping                   | Heating pad group                  | GV14, GV16, GV15, GV12, GB20, GB21, LI17, SI11, SI12, SI13, SI14, SI15, BL10, BL11, BL12, BL13, BL14, BL15, BL16, BL17, BL41, BL42, BL43, BL44, EX-HN15 | 6                 | 7 weeks          | NRS, NDI, EQ-5D                 |
| Lauche 2013                                            | Germany              | chronic nonspecific neck pain  | EG: 30 CG: 31          | EG: 54.5±12.3<br>CG: 53.7±13.4         | Dry cupping                   | progressive muscle relaxation(PMR) | NR                                                                                                                                                      | 24                | 12 weeks         | VAS, NDI, SF-36                 |
| <b>vs active control (wet cupping)</b>                 |                      |                                |                        |                                        |                               |                                    |                                                                                                                                                         |                   |                  |                                 |
| Liu 2016                                               | China                | cervical spondylosis           | EG: 20, CG: 20         | NR                                     | Wet cupping                   | Tuina                              | GV14, Ashi points                                                                                                                                       | 3                 | After treatment  | VAS, effective rate, tenderness |
| Mou 2015                                               | China (Multi center) | cervical radiculopathy         | EG: 68, CG: 56         | EG: 46.4±11.6<br>CG: 47.8±11.9         | Wet cupping                   | MA                                 | GV14, GB21                                                                                                                                              | 4-12              | After treatment  | VAS, NDI, CAS                   |
| Yin 2009                                               | China                | cervical spondylosis           | EG: 56 CG: 55          | EG: 32.13±7.87<br>CG: 35.24±6.67       | Wet cupping                   | MA                                 | EX-B2, BL11, GB21, Ashi points                                                                                                                          | 10                | After treatment  | VAS, effective rate             |
| Zhou 2014                                              | China                | Cervical Spondylopathy         | EG:100 CG:100          | NR                                     | Wet cupping                   | MA                                 | Ashi points, EX-B2, GB21                                                                                                                                | 10                | After treatment  | VAS, effective rate             |
| Jin 2014                                               | China                | neck type cervical spondylosis | EG: 33 CG: 33          | EG: 31.81±8.30<br>CG: 30.48±9.74       | Wet cupping                   | MA                                 | upper shoulder and neck region                                                                                                                          | 5                 | After treatment  | VAS, NPQ, effective rate        |
| Yin 2016                                               | China                | Cervical Spondylosis           | EG: 47, CG: 48         | EG: 45.68 ± 10.46, CG: 47.29 ± 8.03    | Wet cupping                   | acupuncture                        | EX - B2, SI15, GB21, SJ5                                                                                                                                | 4                 | After treatment  | NPQ                             |
| <b>Cupping with usual care vs. usual care (Add-on)</b> |                      |                                |                        |                                        |                               |                                    |                                                                                                                                                         |                   |                  |                                 |
| <b>Dry cupping</b>                                     |                      |                                |                        |                                        |                               |                                    |                                                                                                                                                         |                   |                  |                                 |
| Cai 2015                                               | China                | Chronic neck pain              | EG: 60 CG: 60          | EG: 45.48±10.9<br>CG: 45.7±11.1        | Dry cupping                   | MA                                 | EX-B2                                                                                                                                                   | 12                | After treatment  | SF-MPQ                          |
| Su 2016                                                | China                | Neck pain after sleeping       | EG:29 CG:29            | EG: 30.72±6.69<br>CG: 31.76±7.16       | Dry cupping                   | MA                                 | upper shoulder and neck region                                                                                                                          | 3                 | After treatment  | VAS, effective rate             |
| Sui 2008                                               | China                | cervical radiculopathy         | EG: 120, CG: 120       | NR                                     | Dry cupping (moving)+traction | traction                           | Acupoints at Bladder Meridian and Governor Vessel                                                                                                       | 20                | After treatment  | VAS                             |
| <b>Wet cupping</b>                                     |                      |                                |                        |                                        |                               |                                    |                                                                                                                                                         |                   |                  |                                 |

| Study ID          | Country             | Disease                                       | Number of participants | Age (years, mean±SD)           | Methods of Intervention | Comparison | Cupping sites                  | Number of cupping | Follow up period | Relevant             |
|-------------------|---------------------|-----------------------------------------------|------------------------|--------------------------------|-------------------------|------------|--------------------------------|-------------------|------------------|----------------------|
| <b>Mou 2015*</b>  | China (Multicentre) | cervical radiculopathy                        | EG: 59, CG: 56         | EG: 45.4±11.6<br>CG: 47.8±11.9 | Wet cupping+MA          | MA         | EX-B2, BL11, GB21, Ashi points | 10                | After treatment  | VAS, NDI, CAS        |
| <b>Jiang 2017</b> | China               | Myofascial Pain Syndrome of Neck and Shoulder | EG:30 CG:30            | EG: 21±3<br>CG: 22±3           | Wet cupping+MA          | MA         | Ashi points                    | 5                 | After treatment  | VAS , effective rate |

CAS: Clinical assessment scale, CG: control group, EA: electroacupuncture, EG: experimental group, EQ-5D: EuroQol 5-Dimension, MA: manual acupuncture, NDI: Neck Disability Index, NPQ: Neck Pain Questionnaire, NR: not reported, SD: Standard deviation, SF-MPQ: Short Form McGill Pain Questionnaire, SF-36: 36-Item Short Form Health Survey, VAS: Visual Analogue Scale, VDT: Video Display Terminal, POM: Pain on movement

\*Is a three-armed study, i.e. cupping group, control group, cupping plus control group.

## **Risk of bias assessment**

### ***Random sequence***

Seven of the 18 studies<sup>20 22-25 27 28</sup> were assessed to have low risk of bias as they randomly allocated the subjects using a table of random numbers. One study did not specify the randomization method, and the group sizes notably varied, i.e. 68, 56, and 59; this study was thus assessed to have high risk of bias.<sup>26</sup> The remaining 10 studies, however, only mentioned randomly assigning subjects without specifying the method used for randomization; thus, these studies were assessed to have an unclear risk of bias. The results are shown in Figure 2.

### ***Allocation concealment***

Nine<sup>20 22 24-26 28-31</sup> studies concealed allocation using a sealed envelope, and thus were considered to have low risk of bias. The remaining studies were determined to be unclear as they did not describe the method of allocation concealment used.

### ***Blinding***

Control groups were either waiting list controls or active controls. Although efforts have been made to develop a sham version of cupping<sup>37</sup>, blinding is difficult given that sham cupping is not often used. Chi et al.<sup>29</sup> described single blinding; however, it was difficult to assess whether blinding was actually implemented. Hence, all studies were considered to not have blinded their investigators and participants. With regard to the blinding of participants and medical personnel, all studies were considered to have high risk of bias. Similarly, blinding of outcome assessors could not be performed in most studies as many used VAS for pain measurement and patient-reported outcomes. Blinding of outcome assessors would have been made feasible if the studies had used physician-reported outcomes or other outcome variables measured by the examiner; however, such studies were found lacking. Therefore, all studies were considered to have high risk of bias.

### ***Incomplete outcome data***

Seven<sup>20 22 24 25 27 30 31</sup> studies reported the number of excluded and withdrawn participants, and the number of participants included for final analysis. It was decided that the number of withdrawn participants and the reasons for withdrawal were not a cause of bias; therefore, these studies were considered to have low risk of bias. One study was regarded to possess a high risk of bias as 33 participants from the intervention group and 27 from the control group dropped out after only one session of treatment.<sup>26</sup> The remaining studies were determined to be unclear for not mentioning the number of participants who withdrew or were excluded.

### ***Selective reporting***

Ten<sup>20 22 24 25 27 29-31</sup> of the 18 studies were determined to have unclear risk of bias regarding selective reporting as they did not describe adverse events (AEs) nor did they register the trial protocols. The remaining eight studies were found to have reported all outcome variables initially planned to be investigated, and thus were determined to have low risk of bias.

### ***Other biases***

All studies were assessed to have low risk of other biases.

## Analysis

### *Cupping versus no treatment*

*Pain:* Five studies were included in the meta-analysis.<sup>20 29-32</sup> Compared with the no intervention group, the cupping group reported significant reduction in pain with an MD of -2.42 (95% CI -3.98 to -0.86). Considerable heterogeneity was observed ( $I^2=93%$ ;  $P<0.00001$  [chi-square test]); however, the study by Chi et al.<sup>29</sup> showed a statistically outlying effect size; a sensitivity analysis was conducted with the study omitted, and resulted in an MD of -1.48 (95% CI -1.86, -1.10;  $I^2=0%$ ;  $P=0.57$ ) with the heterogeneity resolved.

*Disability:* Three studies were included in the analysis.<sup>20 30 31</sup> Results revealed that the cupping group reported significant functional improvement compared to the no intervention group with an MD of -4.34 (95% CI -6.77 to -1.91;  $I^2=6%$ ;  $P=0.35$ ).

*QoL:* Three studies were included in the analysis,<sup>20 30 31</sup> and results showed that the cupping group indicated significant improvement in the mental component summary of SF-36, with an MD of 5.32 (95% CI 0.83 to 9.80;  $I^2=32%$ ;  $P=0.23$ ). No statistical significance was found in terms of the physical component summary of SF-36 with an MD of 2.46 (95% CI -0.36, 5.29) (Figure 3).

### *Cupping versus active control*

*Pain:* Ten studies were included in the analysis.<sup>21-28 34 35</sup> Of these 10 studies, nine reported the outcome in VAS, while one study reported NPQ scores.<sup>21</sup> In analysis of the nine studies, the cupping group exhibited significant reduction in pain with an MD of -0.89 (95% CI -1.42 to -0.37;  $P=0.0009$ ) compared with the control group. The chi-square test, however, revealed some heterogeneity ( $p<0.00001$ ;  $I^2=88%$ ). In order to resolve the heterogeneity, studies were analysed separately depending on the type of cupping: either wet (with scarification) or dry. Meta-analysis of three studies conducted with dry cupping indicated an MD of -1.50 (95% CI -2.28 to -0.72 ;  $I^2=28%$ ;  $P=0.25$ ). On the other hand, analysis of studies with wet cupping showed an MD of -0.70 (95% CI -1.32 to -0.07 ;  $I^2=92%$ ;  $P<0.00001$ ) with unresolved heterogeneity. Omission of the study by Zhou 2014<sup>28</sup> – which had a notably large effect size – resulted in an MD of -0.49 (95% CI -0.78 to -0.20) with  $I^2=-35%$ ,  $P=0.19$ , implying that the heterogeneity was considerably resolved. The single study that reported outcomes with NPQ indicated an MD of 3.59 (95% CI 2.02 to 5.16), suggesting that cupping significantly decreased pain compared to the control.

*Disability:* Four studies were included in the analysis.<sup>22 24-26</sup> Compared with the control, the cupping group demonstrated functional improvement, with an MD of -4.36 (95% CI -8.67 to -0.04;  $P=0.05$ ), but not to a statistically significant degree, and substantial heterogeneity was identified ( $I^2=62%$ ;  $P=0.05$ ).

*QoL:* Two studies were included in this analysis.<sup>22 25</sup> Compared with the control, the cupping group reported significant improvement in the physical component summary of SF-36, with an MD of 5.44 (95% CI 2.09 to 8.78;  $P=0.001$ ). However, statistically significant differences were not found for the mental component summary of SF-36 with an MD of 0.44 (95% CI -4.05 to 4.93) (Figure 4). The study by Kim et al. reported EQ-5D outcomes as median values, and therefore inclusion for meta-analysis was not feasible. In this study, the cupping group and control reported identical median values of 0.91, suggesting no statistical difference.

### ***Cupping with active control versus active control (add-on)***

***Pain:*** Five studies were included in the analysis.<sup>19 26 33 35 36</sup> Adding cupping therapy to the treatment administered in the control group led to significant reduction in pain, with an MD of -0.87 (95% CI -1.14 to -0.61;  $P < 0.00001$ ).

***Disability:*** Only one study reported a disability-related outcome,<sup>26</sup> and the effect on disability was not significant, with an MD of 3.61 (95% CI -3.93 to 11.15;  $P = 0.35$ ). Heterogeneity was not identified ( $I^2 = 19\%$ ;  $P = 0.29$ ) (Figure 5).

### ***Safety of cupping***

Ten of the 18 studies included in the final analysis did not address safety, while eight studies did. First, Kim et al.<sup>24</sup> reported skin laceration ( $n = 1$ ), whole body itching ( $n = 1$ ), pain at the cupping sites ( $n = 1$ ), and generalized body ache ( $n = 1$ ) in four patients in the cupping group; however, the study reported that the symptoms were mild and resolved within a few days. Lauche et al. (2012)<sup>31</sup> reported one case of pain during the procedure itself in addition to tension headache, migraine, tinnitus, and wound healing itches; however, all side effects were mild and temporary. Chi et al.<sup>29</sup> reported two cases of mild low back pain due to the seated position in the cupping group. Lauche et al. (2013)<sup>25</sup> reported muscular tension ( $n = 1$ ), increased pain ( $n = 1$ ), and prolapsed intervertebral disc ( $n = 1$ ). While prolapsed intervertebral disc should be regarded as a severe event, the original authors stated that a causal relationship was unlikely. Lauche et al. (2011)<sup>30</sup> reported tingling sensation in the hands and arms ( $n = 1$ ), strain/pain at the treated area ( $n = 2$ ), strain/pain in the general neck region ( $n = 1$ ), slight headache ( $n = 1$ ), tiredness ( $n = 1$ ), shivering attack ( $n = 1$ ), and blurred vision ( $n = 1$ ). Lauche et al. (2011)<sup>30</sup> reported that all symptoms subsided within four hours, and that the causal relationship with cupping was unclear. Yin et al.<sup>27</sup> reported one case of delayed wound healing due to wet cupping. Cramer et al.<sup>22</sup> reported muscle soreness ( $n = 2$ ), minor hematoma ( $n = 1$ ), and increased neck pain for 1 hour to 5 hours ( $n = 2$ ). In the study by Saha et al.,<sup>20</sup> two participants complained of headache that resolved within one hour. One participant suffered upper back pain, which subsided within days, and one participant reported slight dizziness. Although one case of lipoma was identified during the trial, it did not have any causal relationship with cupping, as reported by the authors.

### ***Levels of evidence***

The quality of evidence for each analysis is shown in Table 2. In the waiting list comparison, the quality of evidence for the outcomes of pain, QoL, and disability was assessed to be low to very low due to concerns regarding risk of bias, imprecision and inconsistency. In the active control comparison, the quality of evidence for pain and QoL was low due to risk of bias and imprecision, and that for disability was assessed to be very low due to risk of bias, imprecision, and unexplained heterogeneity. In the add-on comparison between the active control and active control with cupping groups, the quality of evidence for pain in the dry cupping add-on group was low due to risk of bias and unexplained heterogeneity. The quality of evidence for pain outcomes was very low. The quality of evidence for disability outcomes in the add-on groups was low due to risk of bias and imprecision (Table 2).



Table 2. Meta-analysis of outcomes and level of evidence

| Variable                                                | Overall effect |              |          |                |          | Statistical method      | Studies (N) | Sample size (N) | Level of evidence |
|---------------------------------------------------------|----------------|--------------|----------|----------------|----------|-------------------------|-------------|-----------------|-------------------|
|                                                         | MD             | 95% CI       | P        | I <sup>2</sup> | P        |                         |             |                 |                   |
| <b>Cupping vs. Waitlist (Sole)</b>                      |                |              |          |                |          |                         |             |                 |                   |
| Pain (VAS)                                              | -2.42          | -3.98, -0.86 | 0.002    | 93             | <0.00001 | Random Inverse Variance | 5           | 241             | Very low          |
| Pain (VAS) omitting 1 study                             | -1.48          | -1.86, -1.10 | <0.00001 | 0              | 0.57     | Random Inverse Variance | 4           | 181             | -                 |
| Disability (NDI)                                        | -4.34          | -6.77, -1.91 | 0.0005   | 6              | 0.35     | Random Inverse Variance | 3           | 141             | Low               |
| QoL (Physical component of SF-36)                       | 2.46           | -0.36, 5.29  | 0.09     | 24             | 0.27     | Random Inverse Variance | 3           | 141             | Low               |
| QoL (Mental component of SF-36)                         | 5.32           | 0.83, 9.80   | 0.02     | 32             | 0.23     | Random Inverse Variance | 3           | 141             | Low               |
| <b>Cupping vs. Active control (Sole)</b>                |                |              |          |                |          |                         |             |                 |                   |
| Pain (VAS)                                              | -0.89          | -1.42, -0.37 | 0.0009   | 88             | <0.00001 | Random Inverse Variance | 9           | 870             | Low               |
| Pain (VAS) of dry cupping                               | -1.48          | -1.86, -1.10 | <0.00001 | 0              | 0.57     | Random Inverse Variance | 3           | 149             | -                 |
| Pain (VAS) of wet cupping                               | -0.70          | -1.32, -0.07 | 0.03     | 92             | <0.00001 | Random Inverse Variance | 6           | 721             | -                 |
| Pain (VAS) of wet cupping omitting 1 study              | -0.49          | -0.78, -0.20 | 0.0008   | 35             | 0.19     | Random Inverse Variance | 5           | 521             | -                 |
| Disability (NDI)                                        | -4.36          | -8.67, -0.04 | 0.05     | 62             | 0.05     | Random Inverse Variance | 4           | 213             | Very low          |
| QoL (SF-36) (Physical component of SF-36)               | 5.44           | 2.09, 8.78   | 0.001    | 7              | 0.30     | Random Inverse Variance | 2           | 109             | Low               |
| QoL (SF-36) (Mental component of SF-36)                 | 0.44           | -4.05, 4.93  | 0.85     | 0              | 0.59     | Random Inverse Variance | 2           | 109             | Low               |
| <b>Cupping with active control vs. control (add-on)</b> |                |              |          |                |          |                         |             |                 |                   |
| Pain (VAS)                                              | -0.87          | -1.14, -0.61 | <0.00001 | 19             | 0.29     | Random Inverse Variance | 5           | 534             | Low               |
| Disability (NDI)                                        | 3.61           | -3.93, 11.15 | 0.35     | -              | -        | Random Inverse Variance | 1           | 56              | Low               |

VAS: Visual analogue scale, NDI: Neck disability index, QoL: Quality of life, MD: Mean difference

## DISCUSSION

The present study aimed to assess the evidence supporting the effectiveness of cupping for neck pain through a comprehensive systematic literature review. We performed a systematic and inclusive search in non-Asian and Asian databases, including those based in China, Korea, and Japan, where cupping is popular and widely used. Eighteen articles were selected and analysed according to the type of control group used. When compared with inactive controls, cupping significantly reduced pain, and improved function and QoL. However, the heterogeneity between studies was quite high in terms of pain reduction, and the quality of evidence was lowered as a consequence. As one study, by Chi et al.,<sup>29</sup> reported a considerably large effect size, the heterogeneity was resolved when this study was omitted in the sensitivity analysis. Although in most studies the quality of evidence was found to be low to very low, the marked pain reduction and improvement in function and QoL found to be associated with cupping may be clinically relevant. When compared with active controls, the cupping group exhibited significant reduction in pain but no significant differences in functional improvement. Analysis in pain outcomes found an MD of -0.89 (95% CI -1.42 to -0.37); however, heterogeneity was high and subgroup analysis was thus performed. Effect sizes were similar across studies using dry cupping but varied greatly across studies using wet cupping; omission of the study by Zhou et al.<sup>28</sup> resolved the heterogeneity. Additional analyses are needed to clarify whether the differences between studies can be attributed to different types of wet cupping procedures or whether other sociopsychological factors were involved. Wet cupping involves drawing blood before cupping, and, despite being accepted in some cultures, may not be tolerated in others. Furthermore, the intensity of the procedure and amount of bleeding may also have affected study outcomes, which may have further contributed to the varying effect sizes. Alternatively, the type and frequency of procedures and patient pain severity could contribute to varying effect sizes.

When used to compliment existing treatments, cupping was found to significantly reduce pain, with an MD of -0.87 (95% CI -1.14 to -0.61). However, in addition to statistical significance, the effect size of a treatment should be assessed for clinical significance. Based on four studies of cupping, Lauche et al. (2013)<sup>38</sup> proposed the minimal clinically important difference (MCID) of VAS to be -8 (-0.8 of a ten point scale), the NDI to be -3, and the physical component summary of SF-36 to be +5.1. From the current meta-analysis, cupping exhibited an MD of -2.42 compared to the waiting list control, -0.89 compared to the active control, and -0.87 as an add-on treatment, which all surpasses the above criteria for the MCID of VAS. With regard to NDI, cupping indicated an MD of between -4.34 and -4.36, depending on the type of control, which also meets the MCID criteria. For the physical component summary, however, cupping failed to display a treatment effect larger than MCID. In contrast, cupping showed an effect size exceeding MCID when compared to the active control, which calls for further investigation.

Cupping has been used for several thousand years in such diverse regions as early Egypt and China.<sup>8</sup> In traditional Chinese medicine, cupping is widely used to eliminate stagnated Qi and Blood, and facilitate circulation.<sup>39</sup> Since ancient times, cupping has been considered to be effective in the local treatment of areas of inflammation.<sup>40</sup> A previous review analysing the reported mechanism of cupping suggested that the positive effects of cupping are the result of a haemodynamic mechanism facilitating muscle function, as demonstrated by

1  
2  
3  
4 the reduction of deoxy-haemoglobin and elevated oxy-haemoglobin levels in muscle areas treated with  
5 cupping.<sup>41</sup> Other studies have suggested that cupping involves a mechanism for removing oxidative stress,<sup>42</sup> and  
6 produces therapeutic effects through diffuse noxious inhibitory control,<sup>43</sup> this would contribute to the alleviation  
7 of pain.  
8

9 For these reasons, a growing number of clinical trials are investigating the effects of cupping on pain and  
10 various disease symptoms. Through the analysis of 135 RCTs on cupping, Cao et al.<sup>44</sup> reported that clinical trials  
11 of wet cupping have been conducted in association with various disorders such as herpes zoster, facial paralysis,  
12 cough/dyspnea, and acne. A more recent systematic review investigated cupping in relation to overall disease,<sup>45</sup>  
13 however, although the analysis included some articles pertaining to neck pain, it did not focus on the condition.  
14 In another systematic literature review on the efficacy of cupping for lower back pain, cupping was found to  
15 lead to significant reductions in pain and improvement of function.<sup>13 46</sup> Only one previous review has  
16 specifically evaluated the effect of cupping on neck pain, but that review was published in 2013 and analysed  
17 only five trials.<sup>13</sup> Therefore, the results of the present study, which included 18 RCTs and did not limit inclusion  
18 by language, provide greater clinical relevance and implications.  
19

20 However, this study has several limitations. One significant shortcoming is that only some studies reported  
21 issues related to safety. Although severe AEs were not found in association with cupping in the studies that  
22 reported side effects, many studies did not report side effects at all. A systematic review investigating the side  
23 effects of cupping reported that the most common side effect was scar formation, and there have been some  
24 previously reported cases of severe side effects.<sup>47</sup> However, adverse reactions to cupping may vary according to  
25 the proficiency of the practitioner, type of procedure, and disinfection and sterilization processes implemented  
26 during the treatment procedure.<sup>47</sup> Certain severe AEs, such as infection, may be preventable as their occurrence  
27 can be directly associated with the education, training, experience, and proficiency of therapists. Another  
28 limitation was the low or very low quality of evidence for all outcomes; this low quality of evidence was  
29 primarily caused by risk of bias and unexplained heterogeneity between studies. Additionally, many selected  
30 studies did not maintain rigorous standards or procedures regarding allocation and blinding. Furthermore, the  
31 outcomes included for analysis in this study were all patient-reported outcomes (i.e., pain, disability, QoL), and  
32 none of the included studies were designed to assess the placebo effect of cupping. It is possible that the results  
33 may have been influenced by the fact that all outcome measures were patient-reported and the lack of blinding.  
34 Moreover, all of the included studies, with the exception of a study published by Su et al. in 2016,<sup>33</sup> were  
35 conducted only in patients with chronic neck pain. Whether the therapeutic effect of cupping is dependent on the  
36 clinical characteristics (acute vs. chronic) of neck pain remains to be elucidated. Finally, many of the included  
37 studies had small sample sizes.  
38

39 Nevertheless, cupping may be an important and cost-effective therapy for the treatment of neck pain. For  
40 example, Lauche et al. (2013)<sup>25</sup> performed a clinical trial on home-based cupping. Due to the increased use of  
41 computers and smartphones around the world, the prevalence of neck pain is rising steadily,<sup>48</sup> and this type of  
42 pain can often develop into chronic pain. Thus, this study is meaningful in that it evaluates a non-invasive,  
43 simple, and effective treatment modality for patients with chronic pain.  
44  
45  
46

## CONCLUSION

The current results suggest that cupping may be effective for neck pain patients in terms of reducing pain and improving function and quality of life, when compared to no treatment or active controls. The level of evidence for the findings of the included studies, however, was found to be low or very low, thus preventing strong conclusions from being drawn for the effectiveness of this treatment. Although this study did not identify notable AEs in the articles reviewed, cupping is not without side effects, and further well-designed, large-scale studies employing standardized procedures are needed to thoroughly examine potential adverse effects. Furthermore, wet cupping requires rigorous education and training on hygiene and precautions, as it entails a blood-letting process. Although definite conclusions cannot be drawn from this study, cupping appears to be a potentially effective and safe therapy for neck pain.

## FOOTNOTES

**Contributors:** SK, MRK, IHH, and YJL designed the study. SK, SHL and YJL conducted the systematic search. SK, MRK, and YJL assessed the literature for inclusion and extracted the data. JL, JSS, and IHH monitored data collection. EJK, DSH, JL, JSS, and IHH interpreted the data. SK, MRK, IHH, and YJL wrote the draft; SHL, EJK, DSH, JL, and JSS critically revised the manuscript. All authors have read and approved the final version.

**Funding:** This study was supported by the Traditional Korean Medicine R&D Program funded by the Ministry of Health & Welfare through the Korea Health Industry Development Institute (KHIDI) (HB16C0035).

**Competing Interests:** None declared

**Provenance and peer review:** Not commissioned; externally peer reviewed.

**Data sharing statement:** No additional data are available.

## References

1. World Health Organization. Global Health Estimates: Deaths, disability-adjusted life year (DALYs), years of life lost (YLL) and years lost due to disability (YLD) by cause, age, and sex: 2000–2012, 2016.
2. Borghouts JA, Koes BW, Vondeling H, et al. Cost-of-illness of neck pain in The Netherlands in 1996. *Pain* 1999;80(3):629-36.
3. Fejer R, Kyvik KO, Hartvigsen J. The prevalence of neck pain in the world population: a systematic critical review of the literature. *European spine journal* 2006;15(6):834-48.
4. Manchikanti L, Singh V, Datta S, et al. Comprehensive review of epidemiology, scope, and impact of spinal pain. *Pain physician* 2009;12(4):E35-70.
5. Hoy D, Protani M, De R, et al. The epidemiology of neck pain. *Best Practice & Research Clinical Rheumatology* 2010;24(6):783-92.
6. Fine M. Quantifying the impact of NSAID-associated adverse events. *The American journal of managed care* 2013;19(14 Suppl):s267-72.
7. MacPherson H, Tilbrook H, Richmond S, et al. Alexander Technique Lessons or Acupuncture Sessions for Persons With Chronic Neck Pain: A Randomized Trial. *Annals of internal medicine* 2015;163(9):653-62.
8. Qureshi NA, Ali GI, Abushanab TS, et al. History of cupping (Hijama): a narrative review of literature. *Journal of integrative medicine* 2017;15(3):172-81.
9. Romeyke T, Stummer H. Evidence-based complementary and alternative medicine in inpatient care: take a look at Europe. *Journal of evidence-based complementary & alternative medicine* 2015;20(2):87-93.
10. Kim JD, Son MS. 2013 National health insurance statistical yearbook. Seoul: Health Insurance Review and Assessment Service and National Health Insurance Service, 2014.
11. Lee MS, Choi T-Y, Shin B-C, et al. Cupping for hypertension: a systematic review. *Clinical and Experimental Hypertension* 2010;32(7):423-25.
12. Farhadi K, Schwebel DC, Saeb M, et al. The effectiveness of wet-cupping for nonspecific low back pain in Iran: a randomized controlled trial. *Complementary therapies in medicine* 2009;17(1):9-15.
13. Yuan Q-l, Guo T-m, Liu L, et al. Traditional Chinese medicine for neck pain and low back pain: a systematic review and meta-analysis. *PLoS One* 2015;10(2):e0117146.
14. Moher D, Shamseer L, Clarke M, et al. Preferred reporting items for systematic review and meta-analysis protocols (PRISMA-P) 2015 statement. *Systematic reviews* 2015;4(1):1.
15. Aker PD, Gross AR, Goldsmith CH, et al. Conservative management of mechanical neck pain: systematic overview and meta-analysis. *Bmj* 1996;313(7068):1291-96.
16. Kjaer P. National clinical guideline for the non-surgical treatment of recent onset non-specific neck pain. *Danish Health Authority* 2016
17. Choi AR, Shin J-S, Lee J, et al. Current practice and usual care of major cervical disorders in Korea: A cross-sectional study of Korean health insurance review and assessment service national patient sample data. *Medicine* 2017;96(46)

18. Atkins D, Eccles M, Flottorp S, et al. Systems for grading the quality of evidence and the strength of recommendations I: critical appraisal of existing approaches The GRADE Working Group. *BMC health services research* 2004;4(1):38.
19. Jiang X, Liu J, Cheng F, et al. Effects obseration of manipulation, blood-leting puncture and cupping in treating myofascilal pain syndrome of neck and shoulder. *Chinese Journal of Ethnomedicine and Ethnopharmacy* 2017;26(14):117-19.
20. Saha FJ, Schumann S, Cramer H, et al. The effects of cupping massage in patients with chronic neck pain-a randomised controlled trial. *Complementary medicine research* 2017;24(1):26-32.
21. Yin L, Zhang T, Liang Z, et al. Effect of different acupuncture treatment on cervical spondylosis. *Liaoning Journal of Traditional Chinese Medicine* 2016;43(9):1971-74.
22. Cramer H, Lauche R, Hohmann C, et al. Randomized controlled trial of pulsating cupping (pneumatic pulsation therapy) for chronic neck pain. *Complementary Medicine Research* 2011;18(6):327-34.
23. Jin N, Wang B, Li G. Clinical observation of Yang's multiple tapping and cupping for the treatment of neck type cervical spondylosis. *Shanghai Journal of Traditional Chinese Medicine* 2014;48(8):59-60.
24. Kim T-H, Kang JW, Kim KH, et al. Cupping for treating neck pain in video display terminal (VDT) users: a randomized controlled pilot trial. *Journal of occupational health* 2012;54(6):416-26.
25. Lauche R, Materdey S, Cramer H, et al. Effectiveness of home-based cupping massage compared to progressive muscle relaxation in patients with chronic neck pain—a randomized controlled trial. *PLoS one* 2013;8(6):e65378.
26. Mou M-y, Piao S-a, Meng X-w, et al. Therapeutic efficacy observation on bloodletting and cupping for cervical radiculopathy. *Journal of Acupuncture and Tuina Science* 2015;13(4):236-41.
27. Yin J, Wang H. [Fifty-six cases of cervical spondylosis patients treated with wet cupping therapy (in Chinese)]. *Hubei journal of traditional chinese medicine* 2009;31(1):27-28.
28. Zhou H, Huang G, Li X, et al. [A hundread clinical cases of cervical spondylopathy patients treated with wet cupping using Zhuang-style lotus flower needle (in Chinese)]. *Journal of Sichuan of Traditional Chinese Medicine* 2014;32(12):142-43.
29. Chi L-M, Lin L-M, Chen C-L, et al. The effectiveness of cupping therapy on relieving chronic neck and shoulder pain: a randomized controlled trial. *Evidence-Based Complementary and Alternative Medicine* 2016;2016
30. Lauche R, Cramer H, Choi K-E, et al. The influence of a series of five dry cupping treatments on pain and mechanical thresholds in patients with chronic non-specific neck pain-a randomised controlled pilot study. *BMC complementary and alternative medicine* 2011;11(1):63.
31. Lauche R, Cramer H, Hohmann C, et al. The effect of traditional cupping on pain and mechanical thresholds in patients with chronic nonspecific neck pain: a randomised controlled pilot study. *Evidence-based complementary and alternative medicine* 2012;2012
32. Arslan M, Yaman G, Ilhan E, et al. Moving dry cupping therapy reduces upper shoulder and neck pain in office workers. *CLINICAL AND INVESTIGATIVE MEDICINE* 2015;38(4):E217-E20.

- 1  
2  
3  
4 33. Su M, Huang X, Zhang H, et al. Effect of moving cupping and acupuncture on neck pain after sleeping.  
5 *Journal of New Chinese Medicine* 2016;48(2):96-99.  
6  
7 34. Liu F, Hu M, Sun W. Comparative effect of traditional chinese medicine therapy on cervical spondylosis.  
8 *World Latest Medicine Information* 2016;16(18):189-90.  
9  
10 35. Sui G, Wang H. Cupping, Intermittent traction with tuina treatment of 120 cases of cervical spondylosis.  
11 *Shandong Medical Journal* 2008;48(24):79-80.  
12  
13 36. Cai R, Mao X. Clinical observation of treatment by Jiaji cupping on chronic pain for cervical spondylosis.  
14 *Zhejaing Journal of Traditional Chinese Medicine* 2015;50(9):673-73.  
15  
16 37. Lee MS, Kim J-I, Kong JC, et al. Developing and validating a sham cupping device. *Acupuncture in*  
17 *Medicine* 2010;28(4):200-04.  
18  
19 38. Lauche R, Langhorst J, Dobos GJ, et al. Clinically meaningful differences in pain, disability and quality of  
20 life for chronic nonspecific neck pain—a reanalysis of 4 randomized controlled trials of cupping therapy.  
21 *Complementary therapies in medicine* 2013;21(4):342-47.  
22  
23 39. Chirali IZ. Traditional Chinese Medicine Cupping Therapy-E-Book: Elsevier Health Sciences 2014.  
24  
25 40. Turk J, Allen E. Bleeding and cupping. *Annals of the Royal College of Surgeons of England* 1983;65(2):128.  
26  
27 41. Li T, Li Y, Lin Y, et al. Significant and sustaining elevation of blood oxygen induced by Chinese cupping  
28 therapy as assessed by near-infrared spectroscopy. *Biomedical optics express* 2017;8(1):223-29.  
29  
30 42. Tagil SM, Celik HT, Cifteci S, et al. Wet-cupping removes oxidants and decreases oxidative stress.  
31 *Complementary therapies in medicine* 2014;22(6):1032-36.  
32  
33 43. Calvino B, Grilo RM. Central pain control. *Joint Bone Spine* 2006;73(1):10-16.  
34  
35 44. Cao H, Li X, Liu J. An updated review of the efficacy of cupping therapy. *PloS one* 2012;7(2):e31793.  
36  
37 45. Al Bedah AM, Khalil MK, Posadzki P, et al. Evaluation of wet cupping therapy: systematic review of  
38 randomized clinical trials. *The Journal of Alternative and Complementary Medicine* 2016;22(10):768-77.  
39  
40 46. Wang Y-T, Qi Y, Tang F-Y, et al. The effect of cupping therapy for low back pain: A meta-analysis based on  
41 existing randomized controlled trials. *Journal of back and musculoskeletal rehabilitation* 2017(Preprint):1-9.  
42  
43 47. Al-Bedah AM, Shaban T, Suhaibani A, et al. Safety of Cupping Therapy in Studies Conducted in Twenty  
44 One Century: A Review of Literature. 2016  
45  
46 48. Kim S-Y, Koo S-J. Effect of duration of smartphone use on muscle fatigue and pain caused by forward head  
47 posture in adults. *Journal of physical therapy science* 2016;28(6):1669-72.  
48  
49  
50  
51  
52  
53  
54  
55  
56  
57  
58  
59  
60

**FIGURE LEGENDS**

**Figure 1.** PRISMA flow diagram of the literature search

PRISMA : Preferred Reporting Items for Systematic Reviews and Meta Analyses

**Figure 2.** Risk of bias in the included studies, as assessed using the Cochrane Collaboration's risk of bias tool

+: high risk of bias, ?: unclear risk of bias, -: low risk of bias

**Figure 3.** Forest plots demonstrating the effect of cupping as the sole intervention vs. no treatment on neck pain

CI: confidence interval

**Figure 4.** Forest plots demonstrating the effect of cupping as the sole intervention vs. active control on neck pain

CI: confidence interval

**Figure 5.** Forest plots demonstrating the effect of cupping as the add-on intervention on neck pain

CI: confidence interval





Figure 1. PRISMA flow diagram of the literature search

PRISMA : Preferred Reporting Items for Systematic Reviews and Meta Analyses

Figure 1. PRISMA flow diagram of the literature search  
PRISMA : Preferred Reporting Items for Systematic Reviews and Meta Analysis

214x256mm (300 x 300 DPI)

1  
2  
3  
4  
5  
6  
7  
8  
9  
10  
11  
12  
13  
14  
15  
16  
17  
18  
19  
20  
21  
22  
23  
24  
25  
26  
27  
28  
29  
30  
31  
32  
33  
34  
35  
36  
37  
38  
39  
40  
41  
42  
43  
44  
45  
46  
47  
48  
49  
50  
51  
52  
53  
54  
55  
56  
57  
58  
59  
60

|             | Random sequence generation (selection bias) | Allocation concealment (selection bias) | Blinding of participants and personnel(performance bias) | Blinding of outcome assessment (detection bias) | Incomplete outcome data (attrition bias) | Selective reporting (reporting bias) | Other bias |
|-------------|---------------------------------------------|-----------------------------------------|----------------------------------------------------------|-------------------------------------------------|------------------------------------------|--------------------------------------|------------|
| Arslan2015  | ?                                           | ?                                       | ●                                                        | ●                                               | ?                                        | ?                                    | +          |
| Cai 2015    | ?                                           | ?                                       | ●                                                        | ●                                               | ?                                        | ?                                    | +          |
| Chi 2016    | ?                                           | +                                       | ●                                                        | ●                                               | ?                                        | +                                    | +          |
| Cramer 2011 | +                                           | +                                       | ●                                                        | ●                                               | +                                        | +                                    | +          |
| Jiang 2017  | ?                                           | ?                                       | ●                                                        | ●                                               | ?                                        | ?                                    | +          |
| Jin 2014    | +                                           | ?                                       | ●                                                        | ●                                               | ?                                        | ?                                    | +          |
| Kim 2012    | +                                           | +                                       | ●                                                        | ●                                               | +                                        | +                                    | +          |
| Lauche 2011 | ?                                           | +                                       | ●                                                        | ●                                               | +                                        | +                                    | +          |
| Lauche 2012 | ?                                           | +                                       | ●                                                        | ●                                               | +                                        | +                                    | +          |
| Lauche 2013 | +                                           | +                                       | ●                                                        | ●                                               | +                                        | +                                    | +          |
| Liu 2016    | ?                                           | ?                                       | ●                                                        | ●                                               | ?                                        | ?                                    | +          |
| Mou 2015    | ●                                           | +                                       | ●                                                        | ●                                               | ●                                        | ?                                    | +          |
| Saha 2017   | +                                           | +                                       | ●                                                        | ●                                               | +                                        | +                                    | +          |
| Su 2016     | ?                                           | ?                                       | ●                                                        | ●                                               | ?                                        | ?                                    | +          |
| Sui 2008    | ?                                           | ?                                       | ●                                                        | ●                                               | ?                                        | ?                                    | +          |
| Yin 2009    | +                                           | ?                                       | ●                                                        | ●                                               | ?                                        | +                                    | +          |
| Yin 2016    | ?                                           | ?                                       | ●                                                        | ●                                               | +                                        | ?                                    | +          |
| Zhou 2014   | +                                           | +                                       | ●                                                        | ●                                               | ?                                        | ?                                    | +          |

Figure 2. Risk of bias in the included studies, as assessed using the Cochrane Collaboration's risk of bias tool  
+ : high risk of bias, ? : unclear risk of bias, - : low risk of bias

264x731mm (300 x 300 DPI)

3.1 Effect of cupping on pain (versus no treatment)

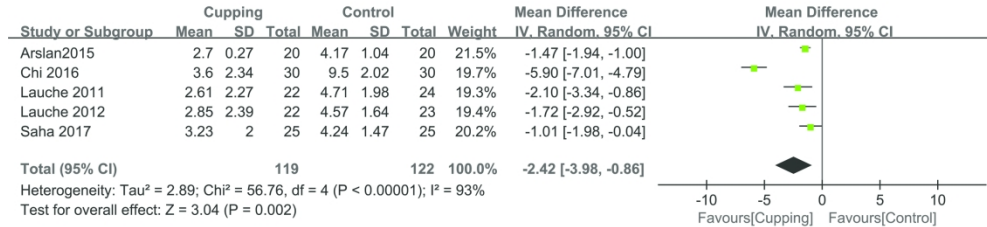

3.2 Effect of cupping on disability (versus no treatment)

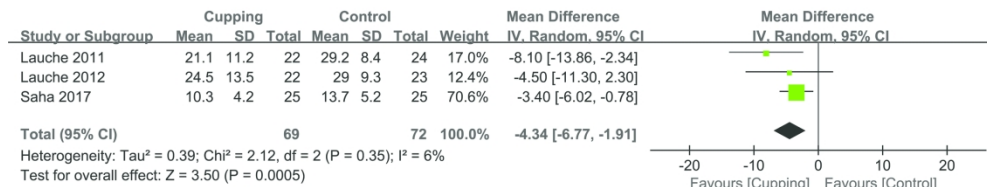

3.3 Effect of cupping on quality of life (physical component summary)



3.4 Effect of cupping on quality of life (mental component summary)



Figure 3. Forest plots demonstrating the effect of cupping as the sole intervention vs no treatment on neck pain

CI : confidence interval

236x285mm (300 x 300 DPI)

## 4.1 Effect of cupping on pain (versus active control)



## 4.2 Effect of cupping on disability (versus active control)



## 4.3 Effect of cupping on quality of life (physical component summary)



## 4.4 Effect of cupping on quality of life (mental component summary)



Figure 4. Forest plots demonstrating the effect of cupping as the sole intervention vs active control on neck pain  
CI : confidence interval

247x313mm (300 x 300 DPI)

5.1 Effect of cupping with active control on pain (versus active control)



5.2 Effect of cupping with active control on disability (versus active control)



Figure 5. Forest plots demonstrating the effect of cupping as the add-on intervention on neck pain  
 CI : confidence interval

119x72mm (300 x 300 DPI)

## Appendix S1 Search strategy

| <b>Ovid-Medline 1946 to Jan Week 1 2018 Date: 2018.01.08</b> |                                                                    |                |
|--------------------------------------------------------------|--------------------------------------------------------------------|----------------|
|                                                              | <b>Searches</b>                                                    | <b>Results</b> |
| 1                                                            | Neck Pain/                                                         | 6385           |
| 2                                                            | exp Brachial Plexus Neuropathies/                                  | 3563           |
| 3                                                            | cervical pain.mp.                                                  | 961            |
| 4                                                            | neckache.mp.                                                       | 20             |
| 5                                                            | cervicodynia.mp.                                                   | 9              |
| 6                                                            | cervicalgia.mp.                                                    | 114            |
| 7                                                            | brachialgia.mp.                                                    | 165            |
| 8                                                            | brachial neuritis.mp.                                              | 174            |
| 9                                                            | brachial neuralgia.mp.                                             | 122            |
| 10                                                           | neck pain.mp.                                                      | 14709          |
| 11                                                           | neck injur*.mp.                                                    | 5953           |
| 12                                                           | brachial plexus neuropath*.mp.                                     | 2277           |
| 13                                                           | brachial plexus neuritis.mp.                                       | 1527           |
| 14                                                           | thoracic outlet syndrome/ or cervical rib syndrome/                | 2228           |
| 15                                                           | Torticollis/                                                       | 3691           |
| 16                                                           | exp brachial plexus neuropathies/ or exp brachial plexus neuritis/ | 3563           |
| 17                                                           | cervico brachial neuralgia.ti,ab.                                  | 43             |
| 18                                                           | cervicobrachial neuralgia.ti,ab.                                   | 68             |
| 19                                                           | (monoradicul* or monoradicl*).tw.                                  | 143            |
| 20                                                           | or/1-19                                                            | 33193          |
| 21                                                           | neck/                                                              | 30018          |
| 22                                                           | neck muscles/                                                      | 6076           |
| 23                                                           | exp cervical plexus/                                               | 8027           |
| 24                                                           | exp cervical vertebrae/                                            | 38618          |
| 25                                                           | atlanto axial joint                                                | 1767           |
| 26                                                           | atlanto occipital joint                                            | 3372           |
| 27                                                           | Cervical Atlas/                                                    | 2539           |

|    |    |                                                                                                   |
|----|----|---------------------------------------------------------------------------------------------------|
| 1  |    |                                                                                                   |
| 2  |    |                                                                                                   |
| 3  |    |                                                                                                   |
| 4  |    |                                                                                                   |
| 5  |    |                                                                                                   |
| 6  | 28 | spinal nerve roots/ 10,825                                                                        |
| 7  | 29 | exp brachial plexus/ 24658                                                                        |
| 8  | 30 | (odontoid* or cervical or occip* or atlant*).tw. 282283                                           |
| 9  |    |                                                                                                   |
| 10 |    |                                                                                                   |
| 11 | 31 | axis/ or odontoid process/ 1777                                                                   |
| 12 |    |                                                                                                   |
| 13 | 32 | Thoracic Vertebrae/ 20133                                                                         |
| 14 |    |                                                                                                   |
| 15 | 33 | cervical vertebrae.mp. 35831                                                                      |
| 16 |    |                                                                                                   |
| 17 | 34 | cervical plexus.mp. 1465                                                                          |
| 18 |    |                                                                                                   |
| 19 | 35 | cervical spine.mp. 21326                                                                          |
| 20 |    |                                                                                                   |
| 21 | 36 | (neck adj3 muscles).mp. 7410                                                                      |
| 22 |    |                                                                                                   |
| 23 | 37 | (brachial adj3 plexus).mp. 13431                                                                  |
| 24 |    |                                                                                                   |
| 25 | 38 | (thoracic adj3 vertebrae).mp. 21124                                                               |
| 26 |    |                                                                                                   |
| 27 | 39 | neck.mp. 244594                                                                                   |
| 28 |    |                                                                                                   |
| 29 | 40 | (thoracic adj3 spine).mp. 7024                                                                    |
| 30 |    |                                                                                                   |
| 31 | 41 | (thoracic adj3 outlet).mp. 2763                                                                   |
| 32 |    |                                                                                                   |
| 33 | 42 | trapezius.mp. 3985                                                                                |
| 34 |    |                                                                                                   |
| 35 | 43 | or/21-42 566354                                                                                   |
| 36 |    |                                                                                                   |
| 37 | 44 | exp pain/ 387369                                                                                  |
| 38 |    |                                                                                                   |
| 39 | 45 | exp injuries/ 891764                                                                              |
| 40 |    |                                                                                                   |
| 41 | 46 | pain.mp. 672242                                                                                   |
| 42 |    |                                                                                                   |
| 43 | 47 | ache.mp. 15382                                                                                    |
| 44 |    |                                                                                                   |
| 45 | 48 | sore.mp. 7757                                                                                     |
| 46 |    |                                                                                                   |
| 47 | 49 | stiff.mp. 9236                                                                                    |
| 48 |    |                                                                                                   |
| 49 | 50 | discomfort.mp. 42264                                                                              |
| 50 |    |                                                                                                   |
| 51 | 51 | injur*.mp. 1050876                                                                                |
| 52 |    |                                                                                                   |
| 53 | 52 | neuropath*.mp. 140510                                                                             |
| 54 |    |                                                                                                   |
| 55 | 53 | or/44-52 2242467                                                                                  |
| 56 |    |                                                                                                   |
| 57 | 54 | 43 and 53 135447                                                                                  |
| 58 |    |                                                                                                   |
| 59 | 55 | Radiculopathy/ 4853                                                                               |
| 60 |    |                                                                                                   |
|    | 56 | exp temporomandibular joint disorders/ or exp temporomandibular joint dysfunction syndrome/ 16566 |

|    |                                                      |        |
|----|------------------------------------------------------|--------|
| 57 | myofascial pain syndromes/                           | 1627   |
| 58 | exp "Sprains and Strains"/                           | 18830  |
| 59 | exp Spinal Osteophytosis/                            | 4196   |
| 60 | exp Neuritis/                                        | 7282   |
| 61 | Polyradiculopathy/                                   | 2656   |
| 62 | exp Arthritis/                                       | 259875 |
| 63 | Fibromyalgia/                                        | 8641   |
| 64 | spondylitis/ or discitis/                            | 6486   |
| 65 | spondylosis/ or spondylolysis/ or spondylolisthesis/ | 7014   |
| 66 | radiculopathy.mp.                                    | 8529   |
| 67 | radiculitis.mp.                                      | 821    |
| 68 | temporomandibular.mp.                                | 27614  |
| 69 | myofascial pain syndrome*.mp.                        | 1967   |
| 70 | thoracic outlet syndrome*.mp.                        | 2552   |
| 71 | spinal osteophytosis.mp.                             | 3575   |
| 72 | neuritis.mp.                                         | 17471  |
| 73 | spondylosis.mp.                                      | 4358   |
| 74 | spondylitis.mp.                                      | 23814  |
| 75 | spondylolisthesis.mp.                                | 6178   |
| 76 | or/55-75                                             | 361804 |
| 77 | 43 and 76                                            | 28356  |
| 78 | exp neck/                                            | 30044  |
| 79 | exp cervical vertebrae/                              | 38618  |
| 80 | Thoracic Vertebrae/                                  | 20133  |
| 81 | neck.mp.                                             | 244594 |
| 82 | (thoracic adj3 vertebrae).mp.                        | 21124  |
| 83 | (thoracic adj3 spine).mp.                            | 7024   |
| 84 | cervical spine.mp.                                   | 21326  |
| 85 | or/78-84                                             | 302173 |
| 86 | Intervertebral Disk/                                 | 13804  |
| 87 | (disc or discs).mp.                                  | 99973  |
| 88 | (disk or disks).mp.                                  | 53273  |



|     |                                                                        |        |
|-----|------------------------------------------------------------------------|--------|
| 89  | or/86-88                                                               | 139200 |
| 90  | 85 and 89                                                              | 9454   |
| 91  | herniat*.mp.                                                           | 21849  |
| 92  | slipped.mp.                                                            | 4540   |
| 93  | prolapse*.mp.                                                          | 32528  |
| 94  | displace*.mp.                                                          | 149806 |
| 95  | degenerat*.mp.                                                         | 237832 |
| 96  | (bulge or bulged or bulging).mp.                                       | 9191   |
| 97  | or/91-96                                                               | 437364 |
| 98  | 90 and 97                                                              | 6049   |
| 99  | intervertebral disk degeneration/ or intervertebral disk displacement/ | 21747  |
| 100 | intervertebral disk displacement.mp.                                   | 1741   |
| 101 | intervertebral disc displacement.mp.                                   | 18641  |
| 102 | intervertebral disk degeneration.mp.                                   | 152    |
| 103 | intervertebral disc degeneration.mp.                                   | 4850   |
| 104 | intervertebral disk hernia.mp.                                         | 222    |
| 105 | or/99-104                                                              | 22513  |
| 106 | 85 and 105                                                             | 4166   |
| 107 | 20 or 54 or 77 or 98 or 106                                            | 156956 |
| 108 | cupping.mp.                                                            | 1754   |
| 109 | ventouse.tw.                                                           | 237    |
| 110 | exp phlebotomy/                                                        | 5704   |
| 111 | bloodletting.mp.                                                       | 2994   |
| 112 | blood letting.mp.                                                      | 349    |
| 113 | bloodletting.mp.                                                       | 2994   |
| 114 | spilled blood.mp.                                                      | 13     |
| 115 | venesection.mp.                                                        | 686    |
| 116 | or/108-115                                                             | 8424   |
| 117 | 107 and 116                                                            | 86     |

Ovid-EMBASE 1980 to 2018 Jan

DATE: 2018.01.08

|    | <b>Searches</b>                                                    | <b>Results</b> |
|----|--------------------------------------------------------------------|----------------|
| 1  | Neck Pain/                                                         | 18952          |
| 2  | brachial plexus neuropathy/                                        | 1779           |
| 3  | cervical pain.mp.                                                  | 1285           |
| 4  | neckache.mp.                                                       | 23             |
| 5  | cervicodynia.mp.                                                   | 17             |
| 6  | cervicalgia.mp.                                                    | 176            |
| 7  | brachialgia/                                                       | 262            |
| 8  | brachialgia.mp.                                                    | 368            |
| 9  | brachial neuritis.mp.                                              | 204            |
| 10 | brachial neuralgia.mp.                                             | 67             |
| 11 | neck pain.mp.                                                      | 21299          |
| 12 | neck injur*.mp.                                                    | 7234           |
| 13 | brachial plexus neuropath*.mp.                                     | 1944           |
| 14 | brachial plexus neuritis.mp.                                       | 85             |
| 15 | thoracic outlet syndrome/                                          | 2075           |
| 16 | Torticollis/                                                       | 4014           |
| 17 | exp brachial plexus neuropathies/ or exp brachial plexus neuritis/ | 1779           |
| 18 | cervico brachial neuralgia.ti,ab.                                  | 36             |
| 19 | cervicobrachial neuralgia.ti,ab.                                   | 75             |
| 20 | (monoradicul* or monoradicl*).tw.                                  | 150            |
| 21 | or/1-20                                                            | 37046          |
| 22 | neck/                                                              | 50115          |
| 23 | neck muscles/                                                      | 5295           |
| 24 | cervical plexus/                                                   | 1090           |
| 25 | cervical spine/                                                    | 31073          |
| 26 | atlantoaxial joint/                                                | 1743           |
| 27 | atlantooccipital joint/                                            | 2016           |
| 28 | atlas/                                                             | 1765           |
| 29 | spinal root/                                                       | 4655           |
| 30 | brachial plexus/                                                   | 7832           |
| 31 | (odontoid* or cervical or occip* or atlant*).tw.                   | 313982         |

|    |                                       |         |
|----|---------------------------------------|---------|
| 32 | odontoid process/                     | 2481    |
| 33 | cervical vertebra.mp.                 | 3529    |
| 34 | cervical vertebrae.mp.                | 3134    |
| 35 | cervical plexus.mp.                   | 1403    |
| 36 | cervical spine.mp.                    | 48597   |
| 37 | (neck adj3 muscles).mp.               | 2581    |
| 38 | (brachial adj3 plexus).mp.            | 17831   |
| 39 | (thoracic adj3 vertebrae).mp.         | 2227    |
| 40 | neck.mp.                              | 300025  |
| 41 | (thoracic adj3 spine).mp.             | 13953   |
| 42 | (thoracic adj3 outlet).mp.            | 2435    |
| 43 | trapezius.mp.                         | 5264    |
| 44 | or/22-43                              | 622696  |
| 45 | exp pain/                             | 1091658 |
| 46 | exp injuries/                         | 66466   |
| 47 | pain.mp.                              | 1032154 |
| 48 | ache.mp.                              | 16783   |
| 49 | sore.mp.                              | 18614   |
| 50 | stiff.mp.                             | 11265   |
| 51 | discomfort.mp.                        | 64832   |
| 52 | injur*.mp.                            | 1377870 |
| 53 | neuropath*.mp.                        | 267008  |
| 54 | or/45-53                              | 2799546 |
| 55 | 44 and 54                             | 151698  |
| 56 | Radiculopathy/                        | 8801    |
| 57 | temporomandibular joint disorder/     | 11910   |
| 58 | myofascial pain/                      | 7225    |
| 59 | spondylosis/ or cervical spondylosis/ | 6895    |
| 60 | Neuritis/                             | 5803    |
| 61 | exp Arthritis/                        | 395884  |
| 62 | Fibromyalgia/                         | 17215   |
| 63 | exp spondylitis/                      | 34738   |

|    |                                  |        |
|----|----------------------------------|--------|
| 64 | diskitis/                        | 2171   |
| 65 | spondylolisthesis/               | 7164   |
| 66 | radiculopathy.mp.                | 11998  |
| 67 | radiculitis.mp.                  | 1260   |
| 68 | temporomandibular.mp.            | 25840  |
| 69 | myofascial pain syndrome*.mp.    | 1158   |
| 70 | spinal osteophytosis.mp.         | 36     |
| 71 | neuritis.mp.                     | 19219  |
| 72 | spondylosis.mp.                  | 8026   |
| 73 | spondylitis.mp.                  | 35047  |
| 74 | spondylolisthesis.mp.            | 7954   |
| 75 | or/56-74                         | 476180 |
| 76 | 44 and 75                        | 27829  |
| 77 | neck/                            | 50115  |
| 78 | cervical spine/                  | 31073  |
| 79 | neck.mp.                         | 300025 |
| 80 | (thoracic adj3 vertebrae).mp.    | 2227   |
| 81 | (thoracic adj3 spine).mp.        | 13953  |
| 82 | cervical spine.mp.               | 48597  |
| 83 | or/77-82                         | 348878 |
| 84 | Intervertebral Disk/             | 11331  |
| 85 | (disc or discs).mp.              | 85296  |
| 86 | (disk or disks).mp.              | 97488  |
| 87 | or/84-86                         | 146518 |
| 88 | 83 and 87                        | 9652   |
| 89 | herniat*.mp.                     | 25041  |
| 90 | slipped.mp.                      | 3710   |
| 91 | prolapse*.mp.                    | 41853  |
| 92 | displace*.mp.                    | 127797 |
| 93 | degenerat*.mp.                   | 321664 |
| 94 | (bulge or bulged or bulging).mp. | 10599  |
| 95 | or/89-94                         | 520028 |

|    |     |                                                      |        |
|----|-----|------------------------------------------------------|--------|
| 1  | 96  | 88 and 95                                            | 5203   |
| 2  | 97  | intervertebral disk hernia/                          | 15253  |
| 3  | 98  | intervertebral disk degeneration/                    | 8780   |
| 4  | 99  | intervertebral disk displacement.mp.                 | 533    |
| 5  | 100 | intervertebral disc displacement.mp.                 | 131    |
| 6  | 101 | intervertebral disk degeneration.mp.                 | 8836   |
| 7  | 102 | intervertebral disc degeneration.mp.                 | 1880   |
| 8  | 103 | or/97-102                                            | 23812  |
| 9  | 104 | 83 and 103                                           | 4121   |
| 10 | 105 | 21 or 55 or 76 or 96 or 104                          | 169900 |
| 11 | 106 | cupping.mp.                                          | 1908   |
| 12 | 107 | ventouse.tw.                                         | 411    |
| 13 | 108 | exp phlebotomy/                                      | 9427   |
| 14 | 109 | bloodletting.mp.                                     | 672    |
| 15 | 110 | blood letting.mp.                                    | 315    |
| 16 | 111 | blood-letting.mp.                                    | 315    |
| 17 | 112 | spilled blood.mp.                                    | 14     |
| 18 | 113 | venesection.mp.                                      | 743    |
| 19 | 114 | 106 or 107 or 108 or 109 or 110 or 111 or 112 or 113 | 12343  |
| 20 | 115 | 105 and 114                                          | 137    |

| Ovid-AMED 1985 to December 2017 |                       | Date: 2018.01.08. |
|---------------------------------|-----------------------|-------------------|
| Searches                        |                       | Results           |
| 1                               | Neck Pain/            | 1031              |
| 2                               | exp Brachial plexus/  | 282               |
| 3                               | cervical pain.mp.     | 75                |
| 4                               | neckache.mp.          | 0                 |
| 5                               | cervicodynia.mp.      | 2                 |
| 6                               | cervicalgia.mp.       | 13                |
| 7                               | brachialgia.mp.       | 6                 |
| 8                               | brachial neuritis.mp. | 1                 |

|    |                                                     |      |
|----|-----------------------------------------------------|------|
| 9  | brachial neuralgia.mp.                              | 5    |
| 10 | neck pain.mp.                                       | 1380 |
| 11 | neck injur*.mp.                                     | 139  |
| 12 | brachial plexus neuropath*.mp.                      | 8    |
| 13 | brachial plexus neuritis.mp.                        | 1    |
| 14 | thoracic outlet syndrome/ or cervical rib syndrome/ | 43   |
| 15 | Torticollis/                                        | 70   |
| 16 | cervico brachial neuralgia.ti,ab.                   | 0    |
| 17 | cervicobrachial neuralgia.ti,ab.                    | 2    |
| 18 | (monoradicul* or monoradicl*).tw.                   | 0    |
| 19 | or/1-18                                             | 1941 |
| 20 | neck/                                               | 663  |
| 21 | neck muscles/                                       | 150  |
| 22 | exp cervical plexus/                                | 30   |
| 23 | exp cervical vertebrae/                             | 1647 |
| 24 | Atlanto axial joint/                                | 32   |
| 25 | Atlanto occipital joint/                            | 17   |
| 26 | spinal nerve roots/                                 | 92   |
| 27 | (odontoid* or cervical or occip* or atlant*).tw.    | 3929 |
| 28 | Axis/                                               | 9    |
| 29 | Odontoid process/                                   | 8    |
| 30 | Thoracic Vertebrae/                                 | 302  |
| 31 | cervical vertebrae.mp.                              | 1678 |
| 32 | cervical plexus.mp.                                 | 11   |
| 33 | cervical spine.mp.                                  | 1163 |
| 34 | (neck adj3 muscles).mp.                             | 311  |
| 35 | (brachial adj3 plexus).mp.                          | 203  |
| 36 | (thoracic adj3 vertebrae).mp.                       | 331  |
| 37 | neck.mp.                                            | 3781 |
| 38 | (thoracic adj3 spine).mp.                           | 355  |
| 39 | (thoracic adj3 outlet).mp.                          | 83   |
| 40 | trapezius.mp.                                       | 502  |
| 41 | or/20-40                                            | 7636 |

|    |                                                      |       |
|----|------------------------------------------------------|-------|
| 42 | exp pain/                                            | 20488 |
| 43 | exp injuries/                                        | 3007  |
| 44 | pain.mp.                                             | 29672 |
| 45 | ache.mp.                                             | 124   |
| 46 | sore.mp.                                             | 167   |
| 47 | stiff.mp.                                            | 228   |
| 48 | discomfort.mp.                                       | 991   |
| 49 | injur*.mp.                                           | 28051 |
| 50 | neuropath*.mp.                                       | 1781  |
| 51 | or/42-50                                             | 57325 |
| 52 | 41 and 51                                            | 4097  |
| 53 | myofascial pain syndromes/                           | 352   |
| 54 | exp "Sprains and Strains"/                           | 949   |
| 55 | exp Spinal Osteophytosis/                            | 35    |
| 56 | exp Neuritis/                                        | 62    |
| 57 | exp Arthritis/                                       | 5513  |
| 58 | Fibromyalgia/                                        | 1647  |
| 59 | spondylitis/ or discitis/                            | 77    |
| 60 | spondylosis/ or spondylolysis/ or spondylolisthesis/ | 140   |
| 61 | radiculopathy.mp.                                    | 285   |
| 62 | radiculitis.mp.                                      | 10    |
| 63 | temporomandibular.mp.                                | 582   |
| 64 | myofascial pain syndrome*.mp.                        | 424   |
| 65 | thoracic outlet syndrome*.mp.                        | 80    |
| 66 | spinal osteophytosis.mp.                             | 41    |
| 67 | neuritis.mp.                                         | 78    |
| 68 | spondylosis.mp.                                      | 130   |
| 69 | spondylitis.mp.                                      | 358   |
| 70 | spondylolisthesis.mp.                                | 154   |
| 71 | or/53-70                                             | 9763  |
| 72 | 41 and 71                                            | 794   |
| 73 | exp neck/                                            | 710   |

|     |                                                                        |      |
|-----|------------------------------------------------------------------------|------|
| 74  | exp cervical vertebrae/                                                | 1647 |
| 75  | Thoracic Vertebrae/                                                    | 302  |
| 76  | neck.mp.                                                               | 3781 |
| 77  | (thoracic adj3 vertebrae).mp.                                          | 331  |
| 78  | (thoracic adj3 spine).mp.                                              | 355  |
| 79  | cervical spine.mp.                                                     | 1163 |
| 80  | or/73-79                                                               | 5755 |
| 81  | Intervertebral Disk/                                                   | 327  |
| 82  | (disc or discs).mp.                                                    | 1209 |
| 83  | (disk or disks).mp.                                                    | 985  |
| 84  | or/81-83                                                               | 1693 |
| 85  | 80 and 84                                                              | 225  |
| 86  | herniat*.mp.                                                           | 390  |
| 87  | slipped.mp.                                                            | 27   |
| 88  | prolapse*.mp.                                                          | 122  |
| 89  | displace*.mp.                                                          | 2548 |
| 90  | degenerat*.mp.                                                         | 1676 |
| 91  | (bulge or bulged or bulging).mp.                                       | 63   |
| 92  | or/86-91                                                               | 4467 |
| 93  | 85 and 92                                                              | 141  |
| 94  | intervertebral disk degeneration/ or intervertebral disk displacement/ | 342  |
| 95  | intervertebral disk displacement.mp.                                   | 376  |
| 96  | intervertebral disc displacement.mp.                                   | 1    |
| 97  | intervertebral disk degeneration.mp.                                   | 29   |
| 98  | intervertebral disc degeneration.mp.                                   | 22   |
| 99  | intervertebral disk hernia/                                            | 0    |
| 100 | or/94-99                                                               | 414  |
| 101 | 80 and 100                                                             | 54   |
| 102 | 19 or 52 or 72 or 93 or 101                                            | 4732 |
| 103 | cupping.mp.                                                            | 173  |
| 104 | ventouse.tw.                                                           | 2    |
| 105 | exp Bloodletting/                                                      | 43   |



|     |                   |     |
|-----|-------------------|-----|
| 106 | exp Cupping/      | 101 |
| 107 | bloodletting.mp.  | 69  |
| 108 | blood letting.mp. | 30  |
| 109 | bloodletting.mp.  | 69  |
| 110 | spilled blood.mp. | 0   |
| 111 | venesection.mp.   | 0   |
| 112 | or/103-111        | 235 |
| 113 | 102 and 112       | 19  |

| Cochrane Library |                                     | Date: 2018.01.09 |
|------------------|-------------------------------------|------------------|
| Searches         |                                     | Results          |
| 1                | [mh ^"Neck pain"]                   | 845              |
| 2                | [mh "Brachial Plexus Neuropathies"] | 53               |
| 3                | cervical pain:ti,ab,kw              | 3071             |
| 4                | neckache:ti,ab,kw                   | 1                |
| 5                | cervicodynia:ti,ab,kw               | 1                |
| 6                | cervicalgia:ti,ab,kw                | 11               |
| 7                | brachialgia:ti,ab,kw                | 12               |
| 8                | brachial neuritis:ti,ab,kw          | 28               |
| 9                | brachial neuralgia:ti,ab,kw         | 17               |
| 10               | neck pain:ti,ab,kw                  | 4667             |
| 11               | neck injur*:ti,ab,kw                | 1417             |
| 12               | brachial plexus neuropath*:ti,ab,kw | 75               |
| 13               | brachial plexus neuritis:ti,ab,kw   | 28               |
| 14               | [mh ^"thoracic outlet syndrome"]    | 18               |
| 15               | [mh ^"cervical rib syndrome"]       | 1                |
| 16               | [mh ^Torticollis]                   | 98               |
| 17               | [mh "brachial plexus neuropathies"] | 53               |
| 18               | [mh "brachial plexus neuritis"]     | 25               |
| 19               | cervico brachial neuralgia:ti,ab,kw | 5                |
| 20               | cervicobrachial neuralgia:ti,ab,kw  | 115              |

|    |                                                                                                                                                        |        |
|----|--------------------------------------------------------------------------------------------------------------------------------------------------------|--------|
| 21 | monoradicul* or monoradici*;ti,ab,kw                                                                                                                   | 26     |
| 22 | #1 or #2 or #3 or #4 or #5 or #6 or #7 or #8 or #9 or #10 or #11 or #12 or #13 or #14 or #15 or #16 or #17 or #18 or #19 or #20 or #21                 | 7525   |
| 23 | [mh ^neck]                                                                                                                                             | 486    |
| 24 | [mh ^"neck muscles"]                                                                                                                                   | 216    |
| 25 | [mh "cervical plexus"]                                                                                                                                 | 111    |
| 26 | [mh "cervical vertebrae"]                                                                                                                              | 994    |
| 27 | [mh ^"atlanto-axial joint"]                                                                                                                            | 23     |
| 28 | [mh ^"atlanto-occipital joint"]                                                                                                                        | 8      |
| 29 | [mh ^"Cervical Atlas"]                                                                                                                                 | 4      |
| 30 | [mh ^"spinal nerve roots"]                                                                                                                             | 150    |
| 31 | [mh "brachial plexus"]                                                                                                                                 | 949    |
| 32 | odontoid* or cervical or occip* or atlant*:ti,ab,kw                                                                                                    | 16822  |
| 33 | [mh ^"odontoid process"]                                                                                                                               | 11     |
| 34 | [mh ^"Thoracic Vertebrae"]                                                                                                                             | 469    |
| 35 | cervical vertebrae:ti,ab,kw                                                                                                                            | 1086   |
| 36 | cervical plexus:ti,ab,kw                                                                                                                               | 217    |
| 37 | cervical spine:ti,ab,kw                                                                                                                                | 1609   |
| 38 | neck muscles:ti,ab,kw                                                                                                                                  | 704    |
| 39 | brachial plexus:ti,ab,kw                                                                                                                               | 1237   |
| 40 | thoracic vertebrae:ti,ab,kw                                                                                                                            | 584    |
| 41 | neck:ti,ab,kw                                                                                                                                          | 15234  |
| 42 | thoracic spine:ti,ab,kw                                                                                                                                | 741    |
| 43 | thoracic outlet:ti,ab,kw                                                                                                                               | 41     |
| 44 | trapezius:ti,ab,kw                                                                                                                                     | 530    |
| 45 | #23 or #24 or #25 or #26 or #27 or #28 or #29 or #30 or #31 or #32 or #33 or #34 or #35 or #36 or #37 or #38 or #39 or #40 or #41 or #42 or #43 or #44 | 33047  |
| 46 | [mh pain]                                                                                                                                              | 39333  |
| 47 | [mh injuries]                                                                                                                                          | 19901  |
| 48 | pain:ti,ab,kw                                                                                                                                          | 107702 |
| 49 | ache:ti,ab,kw                                                                                                                                          | 298    |
| 50 | sore:ti,ab,kw                                                                                                                                          | 2106   |
| 51 | stiff:ti,ab,kw                                                                                                                                         | 296    |

|    |                                                                                                                                                                             |        |
|----|-----------------------------------------------------------------------------------------------------------------------------------------------------------------------------|--------|
| 52 | discomfort:ti,ab,kw                                                                                                                                                         | 9125   |
| 53 | injur*:ti,ab,kw                                                                                                                                                             | 39318  |
| 54 | neuropath*:ti,ab,kw                                                                                                                                                         | 8396   |
| 55 | #46 or #47 or #48 or #49 or #50 or #51 or #52 or #53 or #54                                                                                                                 | 161760 |
| 56 | #45 and #55                                                                                                                                                                 | 10128  |
| 57 | [mh ^Radiculopathy]                                                                                                                                                         | 293    |
| 58 | [mh "temporomandibular joint disorders"]                                                                                                                                    | 614    |
| 59 | [mh "temporomandibular joint dysfunction syndrome"]                                                                                                                         | 179    |
| 60 | [mh "myofascial pain syndromes"]                                                                                                                                            | 451    |
| 61 | [mh "Sprains and Strains"]                                                                                                                                                  | 999    |
| 62 | [mh "Spinal Osteophytosis"]                                                                                                                                                 | 91     |
| 63 | [mh Neuritis]                                                                                                                                                               | 70     |
| 64 | [mh ^polyradiculopathy]                                                                                                                                                     | 13     |
| 65 | [mh arthritis]                                                                                                                                                              | 10946  |
| 66 | [mh ^Fibromyalgia]                                                                                                                                                          | 842    |
| 67 | [mh ^spondylitis]                                                                                                                                                           | 20     |
| 68 | [mh ^discitis]                                                                                                                                                              | 9      |
| 69 | [mh ^spondylosis]                                                                                                                                                           | 126    |
| 70 | [mh ^spondylolysis]                                                                                                                                                         | 11     |
| 71 | [mh ^spondylolisthesis]                                                                                                                                                     | 155    |
| 72 | radiculopathy:ti,ab,kw                                                                                                                                                      | 725    |
| 73 | radiculitis:ti,ab,kw                                                                                                                                                        | 38     |
| 74 | temporomandibular:ti,ab,kw                                                                                                                                                  | 1111   |
| 75 | myofascial pain syndrome*:ti,ab,kw                                                                                                                                          | 569    |
| 76 | thoracic outlet syndrome*:ti,ab,kw                                                                                                                                          | 35     |
| 77 | spinal osteophytosis:ti,ab,kw                                                                                                                                               | 95     |
| 78 | neuritis:ti,ab,kw                                                                                                                                                           | 550    |
| 79 | spondylosis:ti,ab,kw                                                                                                                                                        | 411    |
| 80 | spondylitis:ti,ab,kw                                                                                                                                                        | 1395   |
| 81 | spondylolisthesis:ti,ab,kw                                                                                                                                                  | 460    |
| 82 | #57 or #58 or #59 or #60 or #61 or #62 or #63 or #64 or #65 or #66 or #67 or #68 or #69 or #70 or #71 or #72 or #73 or #74 or #75 or #76 or #77 or #78 or #79 or #80 or #81 | 17164  |

|    |            |                                                           |
|----|------------|-----------------------------------------------------------|
| 1  |            |                                                           |
| 2  |            |                                                           |
| 3  |            |                                                           |
| 4  |            |                                                           |
| 5  |            |                                                           |
| 6  | <b>83</b>  | #45 and #82 1519                                          |
| 7  | <b>84</b>  | [mh neck] 486                                             |
| 8  | <b>85</b>  | [mh "cervical vertebrae"] 994                             |
| 9  |            |                                                           |
| 10 | <b>86</b>  | [mh ^"thoracic vertebrae"] 469                            |
| 11 |            |                                                           |
| 12 | <b>87</b>  | neck:ti,ab,kw 15234                                       |
| 13 |            |                                                           |
| 14 | <b>88</b>  | thoracic vertebrae:ti,ab,kw 584                           |
| 15 |            |                                                           |
| 16 | <b>89</b>  | thoracic spine:ti,ab,kw 741                               |
| 17 |            |                                                           |
| 18 | <b>90</b>  | cervical spine:ti,ab,kw 1609                              |
| 19 | <b>91</b>  | #84 or #85 or #86 or #87 or #88 or #89 or #90 14188       |
| 20 | <b>92</b>  | [mh ^"Intervertebral Disk"] 271                           |
| 21 |            |                                                           |
| 22 | <b>93</b>  | disc\$:ti,ab,kw 3867                                      |
| 23 |            |                                                           |
| 24 | <b>94</b>  | #92 or #93 3867                                           |
| 25 |            |                                                           |
| 26 | <b>95</b>  | #91 and #94 541                                           |
| 27 | <b>96</b>  | herniat*:ti,ab,kw 1225                                    |
| 28 |            |                                                           |
| 29 | <b>97</b>  | slipped:ti,ab,kw 49                                       |
| 30 | <b>98</b>  | prolapse*:ti,ab,kw 1996                                   |
| 31 |            |                                                           |
| 32 | <b>99</b>  | displace*:ti,ab,kw 4124                                   |
| 33 |            |                                                           |
| 34 | <b>100</b> | degenerat*:ti,ab,kw 5989                                  |
| 35 | <b>101</b> | bulge or bulged or bulging:ti,ab,kw 279                   |
| 36 |            |                                                           |
| 37 | <b>102</b> | #96 or #97 or #98 or #99 or #100 or #101 12784            |
| 38 |            |                                                           |
| 39 | <b>103</b> | #95 and #102 372                                          |
| 40 | <b>104</b> | [mh ^"intervertebral disk degeneration"] 205              |
| 41 |            |                                                           |
| 42 | <b>105</b> | [mh ^"intervertebral disk displacement"] 746              |
| 43 |            |                                                           |
| 44 | <b>106</b> | intervertebral disk displacement:ti,ab,kw 247             |
| 45 | <b>107</b> | intervertebral disc displacement:ti,ab,kw 812             |
| 46 |            |                                                           |
| 47 | <b>108</b> | intervertebral disk degeneration:ti,ab,kw 238             |
| 48 |            |                                                           |
| 49 | <b>109</b> | intervertebral disc degeneration:ti,ab,kw 416             |
| 50 | <b>110</b> | intervertebral disk hernia 419                            |
| 51 |            |                                                           |
| 52 | <b>111</b> | #104 or #105 or #106 or #107 or #108 or #109 or #110 1529 |
| 53 |            |                                                           |
| 54 | <b>112</b> | #91 and #111 277                                          |
| 55 | <b>113</b> | #112 or #103 or #83 or #56 or #22 11540                   |
| 56 |            |                                                           |
| 57 | <b>114</b> | cupping:ti,ab,kw 340                                      |
| 58 |            |                                                           |
| 59 | <b>115</b> | ventouse:ti,ab,kw 56                                      |
| 60 |            |                                                           |

|     |                                                              |     |
|-----|--------------------------------------------------------------|-----|
| 116 | MeSH descriptor: [Bloodletting] explode all trees            | 100 |
| 117 | bloodletting:ti,ab,kw                                        | 159 |
| 118 | blood letting:ti,ab,kw                                       | 77  |
| 119 | blood-letting:ti,ab,kw                                       | 72  |
| 120 | spilled blood:ti,ab,kw                                       | 6   |
| 121 | venesection:ti,ab,kw                                         | 60  |
| 122 | #114 or #115 or #116 or #117 or #118 or #119 or #120 or #121 | 596 |
| 123 | #113 and #122                                                | 43  |

### CHINA Academic Journals Full-text Database

(SU='颈痛' OR SU='颈肩痛' OR SU='颈椎病' OR SU='颈肩部' OR SU='颈椎间盘突出症' OR SU='颈部' OR SU='神经根型颈椎病') AND (SU='罐' OR SU='cupping') AND (SU='随机' or SU='对照') 193

颈痛 : neck pain in Chinese / 颈肩痛 : neck pain in Chinese / 颈椎病 : cervical spondylosis in Chinese / 颈肩部 : neck in Chinese / 颈椎间盘突出症 : cervical disc herniation in Chinese / 颈部 : neck in Chinese / 神经根型颈椎病 : cervical radiculopathy in Chinese / 罐 : cupping in Chinese / 随机 : random in Chinese / 对照 : controlled in Chinese

### Korean databases

| KoreaMed (Date : 2018.01.11) |                       |   |
|------------------------------|-----------------------|---|
| 1                            | 경항통 and 부항            | 0 |
| 2                            | neck pain and cupping | 0 |
| 3                            | 頸項痛 and 罐             | 0 |

## KMBASE (Date : 2018.01.11)

|   |                       |   |
|---|-----------------------|---|
| 1 | 경항통 and 부항            | 0 |
| 2 | neck pain and cupping | 0 |
| 3 | 頸項痛 and 罐             | 0 |
|   |                       |   |

## OASIS (Date : 2018.01.11)

|   |                       |   |
|---|-----------------------|---|
| 1 | 경항통 and 부항            | 0 |
| 2 | neck pain and cupping | 0 |
| 3 | 頸項痛 and 罐             | 0 |
|   |                       |   |

## NDSL (Date : 2018.1.11)

|   |                       |    |
|---|-----------------------|----|
| 1 | 경항통 and 부항            | 0  |
| 2 | neck pain and cupping | 37 |
| 3 | 頸項痛 and 罐             | 0  |
|   |                       |    |

## KISS (Date : 2018. 01. 11)

|   |                       |   |
|---|-----------------------|---|
| 1 | 경항통 and 부항            | 0 |
| 2 | neck pain and cupping | 5 |
| 3 | 頸項痛 and 罐             | 5 |
|   |                       |   |

경항통 : neck pain in Korean / 부항 : cupping in Korean / 頸項痛 : neck pain in Chinese / 罐 :

cupping in Chinese

## Japan database

| J-stage (Date : 2018. 01. 11) |                   |    |
|-------------------------------|-------------------|----|
| 1                             | neck pain cupping | 15 |

| 医学中央雑誌刊行会(Ichushi)(Date : 2018. 01. 11) |                                               |        |
|-----------------------------------------|-----------------------------------------------|--------|
| #1                                      | (頸椎症性脊髄症/TH or 頸椎症/AL)                        | 10,553 |
| #2                                      | 頸椎椎間板ヘルニア/AL                                  | 1077   |
| #3                                      | ((@頸椎/TH and @脊椎損傷/TH and @捻挫/TH) or 頸椎捻挫/AL) | 327    |
| #4                                      | (頸部痛/TH or 頸部疼痛/AL)                           | 2188   |
| #6                                      | 頸肩部痛/AL                                       | 64     |
| #7                                      | #1 or #2 or #3 or #4 or #5 or #6              | 13698  |
| #8                                      | cupping/AL                                    | 38     |
| #9                                      | 吸角/AL                                         | 30     |
| #10                                     | #8 or #9                                      | 66     |
| #11                                     | #7 AND #10                                    | 1      |

頸椎症 : cervical spondylosis in Japanese / 頸椎椎間板ヘルニア: cervical disc herniation in Japanese /

頸椎 : cervical vertebrae in Japanese / 脊椎損傷 : vertebral injury in Japanese / 捻挫 : sprain in

Japanese / 頸椎捻挫 : sprain of cervical spine in Japanese / 頸部痛 : neck pain in Japanese / 頸部疼

痛 : neck pain in Japanese / 頸肩部痛 : neck pain in Japanese / 吸角 : cupping in Japanese



# PRISMA 2009 Checklist

| Section/topic                      | #  | Checklist item                                                                                                                                                                                                                                                                                              | Reported on page # |
|------------------------------------|----|-------------------------------------------------------------------------------------------------------------------------------------------------------------------------------------------------------------------------------------------------------------------------------------------------------------|--------------------|
| <b>TITLE</b>                       |    |                                                                                                                                                                                                                                                                                                             |                    |
| Title                              | 1  | Identify the report as a systematic review, meta-analysis, or both.                                                                                                                                                                                                                                         | 1                  |
| <b>ABSTRACT</b>                    |    |                                                                                                                                                                                                                                                                                                             |                    |
| Structured summary                 | 2  | Provide a structured summary including, as applicable: background; objectives; data sources; study eligibility criteria, participants, and interventions; study appraisal and synthesis methods; results; limitations; conclusions and implications of key findings; systematic review registration number. | 2                  |
| <b>INTRODUCTION</b>                |    |                                                                                                                                                                                                                                                                                                             |                    |
| Rationale                          | 3  | Describe the rationale for the review in the context of what is already known.                                                                                                                                                                                                                              | 4                  |
| Objectives                         | 4  | Provide an explicit statement of questions being addressed with reference to participants, interventions, comparisons, outcomes, and study design (PICOS).                                                                                                                                                  | 4-5                |
| <b>METHODS</b>                     |    |                                                                                                                                                                                                                                                                                                             |                    |
| Protocol and registration          | 5  | Indicate if a review protocol exists, if and where it can be accessed (e.g., Web address), and, if available, provide registration information including registration number.                                                                                                                               | 5                  |
| Eligibility criteria               | 6  | Specify study characteristics (e.g., PICOS, length of follow-up) and report characteristics (e.g., years considered, language, publication status) used as criteria for eligibility, giving rationale.                                                                                                      | 5                  |
| Information sources                | 7  | Describe all information sources (e.g., databases with dates of coverage, contact with study authors to identify additional studies) in the search and date last searched.                                                                                                                                  | 5                  |
| Search                             | 8  | Present full electronic search strategy for at least one database, including any limits used, such that it could be repeated.                                                                                                                                                                               | Appendix 1         |
| Study selection                    | 9  | State the process for selecting studies (i.e., screening, eligibility, included in systematic review, and, if applicable, included in the meta-analysis).                                                                                                                                                   | 5                  |
| Data collection process            | 10 | Describe method of data extraction from reports (e.g., piloted forms, independently, in duplicate) and any processes for obtaining and confirming data from investigators.                                                                                                                                  | 5-6                |
| Data items                         | 11 | List and define all variables for which data were sought (e.g., PICOS, funding sources) and any assumptions and simplifications made.                                                                                                                                                                       | 5-6                |
| Risk of bias in individual studies | 12 | Describe methods used for assessing risk of bias of individual studies (including specification of whether this was done at the study or outcome level), and how this information is to be used in any data synthesis.                                                                                      | 5-6, 11            |
| Summary measures                   | 13 | State the principal summary measures (e.g., risk ratio, difference in means).                                                                                                                                                                                                                               | 6                  |
| Synthesis of results               | 14 | Describe the methods of handling data and combining results of studies, if done, including measures of consistency (e.g., $I^2$ ) for each meta-analysis.                                                                                                                                                   | 6                  |





# PRISMA 2009 Checklist

Page 1 of 2

| Section/topic                 | #  | Checklist item                                                                                                                                                                                           | Reported on page # |
|-------------------------------|----|----------------------------------------------------------------------------------------------------------------------------------------------------------------------------------------------------------|--------------------|
| Risk of bias across studies   | 15 | Specify any assessment of risk of bias that may affect the cumulative evidence (e.g., publication bias, selective reporting within studies).                                                             | 6                  |
| Additional analyses           | 16 | Describe methods of additional analyses (e.g., sensitivity or subgroup analyses, meta-regression), if done, indicating which were pre-specified.                                                         | 6                  |
| <b>RESULTS</b>                |    |                                                                                                                                                                                                          |                    |
| Study selection               | 17 | Give numbers of studies screened, assessed for eligibility, and included in the review, with reasons for exclusions at each stage, ideally with a flow diagram.                                          | 7, Figure 1        |
| Study characteristics         | 18 | For each study, present characteristics for which data were extracted (e.g., study size, PICOS, follow-up period) and provide the citations.                                                             | 7, Table 1         |
| Risk of bias within studies   | 19 | Present data on risk of bias of each study and, if available, any outcome level assessment (see item 12).                                                                                                | 11<br>Figure 2     |
| Results of individual studies | 20 | For all outcomes considered (benefits or harms), present, for each study: (a) simple summary data for each intervention group (b) effect estimates and confidence intervals, ideally with a forest plot. | 11-13              |
| Synthesis of results          | 21 | Present results of each meta-analysis done, including confidence intervals and measures of consistency.                                                                                                  | 11-13              |
| Risk of bias across studies   | 22 | Present results of any assessment of risk of bias across studies (see Item 15).                                                                                                                          | 11<br>Figure 2     |
| Additional analysis           | 23 | Give results of additional analyses, if done (e.g., sensitivity or subgroup analyses, meta-regression [see Item 16]).                                                                                    | 11-13              |
| <b>DISCUSSION</b>             |    |                                                                                                                                                                                                          |                    |
| Summary of evidence           | 24 | Summarize the main findings including the strength of evidence for each main outcome; consider their relevance to key groups (e.g., healthcare providers, users, and policy makers).                     | 15                 |
| Limitations                   | 25 | Discuss limitations at study and outcome level (e.g., risk of bias), and at review-level (e.g., incomplete retrieval of identified research, reporting bias).                                            | 16                 |
| Conclusions                   | 26 | Provide a general interpretation of the results in the context of other evidence, and implications for future research.                                                                                  | 16-17              |
| <b>FUNDING</b>                |    |                                                                                                                                                                                                          |                    |
| Funding                       | 27 | Describe sources of funding for the systematic review and other support (e.g., supply of data); role of funders for the systematic review.                                                               | 17                 |



# PRISMA 2009 Checklist

For more information, visit: [www.prisma-statement.org](http://www.prisma-statement.org).

For peer review only

1  
2  
3  
4  
5  
6  
7  
8  
9  
10  
11  
12  
13  
14  
15  
16  
17  
18  
19  
20  
21  
22  
23  
24  
25  
26  
27  
28  
29  
30  
31  
32  
33  
34  
35  
36  
37  
38  
39  
40  
41  
42  
43  
44  
45  
46  
47
