# Supplementary material for: Is cupping therapy effective in patients with neck pain? A systematic review and meta-analysis
Source: PubMed Central journal article supplement — BMJ Open. 2018 Nov 5;8(11):e021070. doi: 10.1136/bmjopen-2017-021070 (PMC6231582; doi:10.1136/bmjopen-2017-021070), 2018-11-05
Supplement: bmjopen-2017-021070supp001.pdf [file bmjopen-2017-021070supp001.pdf]

Appendix S1 Search strategy

| <b>Ovid-Medline 1946 to Jan Week 1 2018 Date: 2018.01.08</b> |                                                                    |                |
|--------------------------------------------------------------|--------------------------------------------------------------------|----------------|
|                                                              | <b>Searches</b>                                                    | <b>Results</b> |
| <b>1</b>                                                     | Neck Pain/                                                         | 6385           |
| <b>2</b>                                                     | exp Brachial Plexus Neuropathies/                                  | 3563           |
| <b>3</b>                                                     | cervical pain.mp.                                                  | 961            |
| <b>4</b>                                                     | neckache.mp.                                                       | 20             |
| <b>5</b>                                                     | cervicodynia.mp.                                                   | 9              |
| <b>6</b>                                                     | cervicalgia.mp.                                                    | 114            |
| <b>7</b>                                                     | brachialgia.mp.                                                    | 165            |
| <b>8</b>                                                     | brachial neuritis.mp.                                              | 174            |
| <b>9</b>                                                     | brachial neuralgia.mp.                                             | 122            |
| <b>10</b>                                                    | neck pain.mp.                                                      | 14709          |
| <b>11</b>                                                    | neck injur*.mp.                                                    | 5953           |
| <b>12</b>                                                    | brachial plexus neuropath*.mp.                                     | 2277           |
| <b>13</b>                                                    | brachial plexus neuritis.mp.                                       | 1527           |
| <b>14</b>                                                    | thoracic outlet syndrome/ or cervical rib syndrome/                | 2228           |
| <b>15</b>                                                    | Torticollis/                                                       | 3691           |
| <b>16</b>                                                    | exp brachial plexus neuropathies/ or exp brachial plexus neuritis/ | 3563           |
| <b>17</b>                                                    | cervico brachial neuralgia.ti,ab.                                  | 43             |
| <b>18</b>                                                    | cervicobrachial neuralgia.ti,ab.                                   | 68             |
| <b>19</b>                                                    | (monoradicul* or monoradickl*).tw.                                 | 143            |
| <b>20</b>                                                    | or/1-19                                                            | 33193          |
| <b>21</b>                                                    | neck/                                                              | 30018          |
| <b>22</b>                                                    | neck muscles/                                                      | 6076           |
| <b>23</b>                                                    | exp cervical plexus/                                               | 8027           |
| <b>24</b>                                                    | exp cervical vertebrae/                                            | 38618          |
| <b>25</b>                                                    | atlanto axial joint                                                | 1767           |
| <b>26</b>                                                    | atlanto occipital joint                                            | 3372           |
| <b>27</b>                                                    | Cervical Atlas/                                                    | 2539           |

|           |                                                                                             |         |
|-----------|---------------------------------------------------------------------------------------------|---------|
| <b>28</b> | spinal nerve roots/                                                                         | 10,825  |
| <b>29</b> | exp brachial plexus/                                                                        | 24658   |
| <b>30</b> | (odontoid* or cervical or occip* or atlant*).tw.                                            | 282283  |
| <b>31</b> | axis/ or odontoid process/                                                                  | 1777    |
| <b>32</b> | Thoracic Vertebrae/                                                                         | 20133   |
| <b>33</b> | cervical vertebrae.mp.                                                                      | 35831   |
| <b>34</b> | cervical plexus.mp.                                                                         | 1465    |
| <b>35</b> | cervical spine.mp.                                                                          | 21326   |
| <b>36</b> | (neck adj3 muscles).mp.                                                                     | 7410    |
| <b>37</b> | (brachial adj3 plexus).mp.                                                                  | 13431   |
| <b>38</b> | (thoracic adj3 vertebrae).mp.                                                               | 21124   |
| <b>39</b> | neck.mp.                                                                                    | 244594  |
| <b>40</b> | (thoracic adj3 spine).mp.                                                                   | 7024    |
| <b>41</b> | (thoracic adj3 outlet).mp.                                                                  | 2763    |
| <b>42</b> | trapezius.mp.                                                                               | 3985    |
| <b>43</b> | or/21-42                                                                                    | 566354  |
| <b>44</b> | exp pain/                                                                                   | 387369  |
| <b>45</b> | exp injuries/                                                                               | 891764  |
| <b>46</b> | pain.mp.                                                                                    | 672242  |
| <b>47</b> | ache.mp.                                                                                    | 15382   |
| <b>48</b> | sore.mp.                                                                                    | 7757    |
| <b>49</b> | stiff.mp.                                                                                   | 9236    |
| <b>50</b> | discomfort.mp.                                                                              | 42264   |
| <b>51</b> | injur*.mp.                                                                                  | 1050876 |
| <b>52</b> | neuropath*.mp.                                                                              | 140510  |
| <b>53</b> | or/44-52                                                                                    | 2242467 |
| <b>54</b> | 43 and 53                                                                                   | 135447  |
| <b>55</b> | Radiculopathy/                                                                              | 4853    |
| <b>56</b> | exp temporomandibular joint disorders/ or exp temporomandibular joint dysfunction syndrome/ | 16566   |

|    |                                                      |        |
|----|------------------------------------------------------|--------|
| 57 | myofascial pain syndromes/                           | 1627   |
| 58 | exp "Sprains and Strains"/                           | 18830  |
| 59 | exp Spinal Osteophytosis/                            | 4196   |
| 60 | exp Neuritis/                                        | 7282   |
| 61 | Polyradiculopathy/                                   | 2656   |
| 62 | exp Arthritis/                                       | 259875 |
| 63 | Fibromyalgia/                                        | 8641   |
| 64 | spondylitis/ or discitis/                            | 6486   |
| 65 | spondylosis/ or spondylolysis/ or spondylolisthesis/ | 7014   |
| 66 | radiculopathy.mp.                                    | 8529   |
| 67 | radiculitis.mp.                                      | 821    |
| 68 | temporomandibular.mp.                                | 27614  |
| 69 | myofascial pain syndrome*.mp.                        | 1967   |
| 70 | thoracic outlet syndrome*.mp.                        | 2552   |
| 71 | spinal osteophytosis.mp.                             | 3575   |
| 72 | neuritis.mp.                                         | 17471  |
| 73 | spondylosis.mp.                                      | 4358   |
| 74 | spondylitis.mp.                                      | 23814  |
| 75 | spondylolisthesis.mp.                                | 6178   |
| 76 | or/55-75                                             | 361804 |
| 77 | 43 and 76                                            | 28356  |
| 78 | exp neck/                                            | 30044  |
| 79 | exp cervical vertebrae/                              | 38618  |
| 80 | Thoracic Vertebrae/                                  | 20133  |
| 81 | neck.mp.                                             | 244594 |
| 82 | (thoracic adj3 vertebrae).mp.                        | 21124  |
| 83 | (thoracic adj3 spine).mp.                            | 7024   |
| 84 | cervical spine.mp.                                   | 21326  |
| 85 | or/78-84                                             | 302173 |
| 86 | Intervertebral Disk/                                 | 13804  |
| 87 | (disc or discs).mp.                                  | 99973  |
| 88 | (disk or disks).mp.                                  | 53273  |

|            |                                                                        |        |
|------------|------------------------------------------------------------------------|--------|
| <b>89</b>  | or/86-88                                                               | 139200 |
| <b>90</b>  | 85 and 89                                                              | 9454   |
| <b>91</b>  | herniat*.mp.                                                           | 21849  |
| <b>92</b>  | slipped.mp.                                                            | 4540   |
| <b>93</b>  | prolapse*.mp.                                                          | 32528  |
| <b>94</b>  | displace*.mp.                                                          | 149806 |
| <b>95</b>  | degenerat*.mp.                                                         | 237832 |
| <b>96</b>  | (bulge or bulged or bulging).mp.                                       | 9191   |
| <b>97</b>  | or/91-96                                                               | 437364 |
| <b>98</b>  | 90 and 97                                                              | 6049   |
| <b>99</b>  | intervertebral disk degeneration/ or intervertebral disk displacement/ | 21747  |
| <b>100</b> | intervertebral disk displacement.mp.                                   | 1741   |
| <b>101</b> | intervertebral disc displacement.mp.                                   | 18641  |
| <b>102</b> | intervertebral disk degeneration.mp.                                   | 152    |
| <b>103</b> | intervertebral disc degeneration.mp.                                   | 4850   |
| <b>104</b> | intervertebral disk hernia.mp.                                         | 222    |
| <b>105</b> | or/99-104                                                              | 22513  |
| <b>106</b> | 85 and 105                                                             | 4166   |
| <b>107</b> | 20 or 54 or 77 or 98 or 106                                            | 156956 |
| <b>108</b> | cupping.mp.                                                            | 1754   |
| <b>109</b> | ventouse.tw.                                                           | 237    |
| <b>110</b> | exp phlebotomy/                                                        | 5704   |
| <b>111</b> | bloodletting.mp.                                                       | 2994   |
| <b>112</b> | blood letting.mp.                                                      | 349    |
| <b>113</b> | bloodletting.mp.                                                       | 2994   |
| <b>114</b> | spilled blood.mp.                                                      | 13     |
| <b>115</b> | venesection.mp.                                                        | 686    |
| <b>116</b> | or/108-115                                                             | 8424   |
| <b>117</b> | 107 and 116                                                            | 86     |

|           | <b>Searches</b>                                                    | <b>Results</b> |
|-----------|--------------------------------------------------------------------|----------------|
| <b>1</b>  | Neck Pain/                                                         | 18952          |
| <b>2</b>  | brachial plexus neuropathy/                                        | 1779           |
| <b>3</b>  | cervical pain.mp.                                                  | 1285           |
| <b>4</b>  | neckache.mp.                                                       | 23             |
| <b>5</b>  | cervicodynia.mp.                                                   | 17             |
| <b>6</b>  | cervicalgia.mp.                                                    | 176            |
| <b>7</b>  | brachialgia/                                                       | 262            |
| <b>8</b>  | brachialgia.mp.                                                    | 368            |
| <b>9</b>  | brachial neuritis.mp.                                              | 204            |
| <b>10</b> | brachial neuralgia.mp.                                             | 67             |
| <b>11</b> | neck pain.mp.                                                      | 21299          |
| <b>12</b> | neck injur*.mp.                                                    | 7234           |
| <b>13</b> | brachial plexus neuropath*.mp.                                     | 1944           |
| <b>14</b> | brachial plexus neuritis.mp.                                       | 85             |
| <b>15</b> | thoracic outlet syndrome/                                          | 2075           |
| <b>16</b> | Torticollis/                                                       | 4014           |
| <b>17</b> | exp brachial plexus neuropathies/ or exp brachial plexus neuritis/ | 1779           |
| <b>18</b> | cervico brachial neuralgia.ti,ab.                                  | 36             |
| <b>19</b> | cervicobrachial neuralgia.ti,ab.                                   | 75             |
| <b>20</b> | (monoradicul* or monoradicl*).tw.                                  | 150            |
| <b>21</b> | or/1-20                                                            | 37046          |
| <b>22</b> | neck/                                                              | 50115          |
| <b>23</b> | neck muscles/                                                      | 5295           |
| <b>24</b> | cervical plexus/                                                   | 1090           |
| <b>25</b> | cervical spine/                                                    | 31073          |
| <b>26</b> | atlantoaxial joint/                                                | 1743           |
| <b>27</b> | atlantooccipital joint/                                            | 2016           |
| <b>28</b> | atlas/                                                             | 1765           |
| <b>29</b> | spinal root/                                                       | 4655           |
| <b>30</b> | brachial plexus/                                                   | 7832           |
| <b>31</b> | (odontoid* or cervical or occip* or atlant*).tw.                   | 313982         |

|           |                                       |         |
|-----------|---------------------------------------|---------|
| <b>32</b> | odontoid process/                     | 2481    |
| <b>33</b> | cervical vertebra.mp.                 | 3529    |
| <b>34</b> | cervical vertebrae.mp.                | 3134    |
| <b>35</b> | cervical plexus.mp.                   | 1403    |
| <b>36</b> | cervical spine.mp.                    | 48597   |
| <b>37</b> | (neck adj3 muscles).mp.               | 2581    |
| <b>38</b> | (brachial adj3 plexus).mp.            | 17831   |
| <b>39</b> | (thoracic adj3 vertebrae).mp.         | 2227    |
| <b>40</b> | neck.mp.                              | 300025  |
| <b>41</b> | (thoracic adj3 spine).mp.             | 13953   |
| <b>42</b> | (thoracic adj3 outlet).mp.            | 2435    |
| <b>43</b> | trapezius.mp.                         | 5264    |
| <b>44</b> | or/22-43                              | 622696  |
| <b>45</b> | exp pain/                             | 1091658 |
| <b>46</b> | exp injuries/                         | 66466   |
| <b>47</b> | pain.mp.                              | 1032154 |
| <b>48</b> | ache.mp.                              | 16783   |
| <b>49</b> | sore.mp.                              | 18614   |
| <b>50</b> | stiff.mp.                             | 11265   |
| <b>51</b> | discomfort.mp.                        | 64832   |
| <b>52</b> | injur*.mp.                            | 1377870 |
| <b>53</b> | neuropath*.mp.                        | 267008  |
| <b>54</b> | or/45-53                              | 2799546 |
| <b>55</b> | 44 and 54                             | 151698  |
| <b>56</b> | Radiculopathy/                        | 8801    |
| <b>57</b> | temporomandibular joint disorder/     | 11910   |
| <b>58</b> | myofascial pain/                      | 7225    |
| <b>59</b> | spondylosis/ or cervical spondylosis/ | 6895    |
| <b>60</b> | Neuritis/                             | 5803    |
| <b>61</b> | exp Arthritis/                        | 395884  |
| <b>62</b> | Fibromyalgia/                         | 17215   |
| <b>63</b> | exp spondylitis/                      | 34738   |

|           |                                  |        |
|-----------|----------------------------------|--------|
| <b>64</b> | diskitis/                        | 2171   |
| <b>65</b> | spondylolisthesis/               | 7164   |
| <b>66</b> | radiculopathy.mp.                | 11998  |
| <b>67</b> | radiculitis.mp.                  | 1260   |
| <b>68</b> | temporomandibular.mp.            | 25840  |
| <b>69</b> | myofascial pain syndrome*.mp.    | 1158   |
| <b>70</b> | spinal osteophytosis.mp.         | 36     |
| <b>71</b> | neuritis.mp.                     | 19219  |
| <b>72</b> | spondylosis.mp.                  | 8026   |
| <b>73</b> | spondylitis.mp.                  | 35047  |
| <b>74</b> | spondylolisthesis.mp.            | 7954   |
| <b>75</b> | or/56-74                         | 476180 |
| <b>76</b> | 44 and 75                        | 27829  |
| <b>77</b> | neck/                            | 50115  |
| <b>78</b> | cervical spine/                  | 31073  |
| <b>79</b> | neck.mp.                         | 300025 |
| <b>80</b> | (thoracic adj3 vertebrae).mp.    | 2227   |
| <b>81</b> | (thoracic adj3 spine).mp.        | 13953  |
| <b>82</b> | cervical spine.mp.               | 48597  |
| <b>83</b> | or/77-82                         | 348878 |
| <b>84</b> | Intervertebral Disk/             | 11331  |
| <b>85</b> | (disc or discs).mp.              | 85296  |
| <b>86</b> | (disk or disks).mp.              | 97488  |
| <b>87</b> | or/84-86                         | 146518 |
| <b>88</b> | 83 and 87                        | 9652   |
| <b>89</b> | herniat*.mp.                     | 25041  |
| <b>90</b> | slipped.mp.                      | 3710   |
| <b>91</b> | prolapse*.mp.                    | 41853  |
| <b>92</b> | displace*.mp.                    | 127797 |
| <b>93</b> | degenerat*.mp.                   | 321664 |
| <b>94</b> | (bulge or bulged or bulging).mp. | 10599  |
| <b>95</b> | or/89-94                         | 520028 |

|            |                                                      |        |
|------------|------------------------------------------------------|--------|
| <b>96</b>  | 88 and 95                                            | 5203   |
| <b>97</b>  | intervertebral disk hernia/                          | 15253  |
| <b>98</b>  | intervertebral disk degeneration/                    | 8780   |
| <b>99</b>  | intervertebral disk displacement.mp.                 | 533    |
| <b>100</b> | intervertebral disc displacement.mp.                 | 131    |
| <b>101</b> | intervertebral disk degeneration.mp.                 | 8836   |
| <b>102</b> | intervertebral disc degeneration.mp.                 | 1880   |
| <b>103</b> | or/97-102                                            | 23812  |
| <b>104</b> | 83 and 103                                           | 4121   |
| <b>105</b> | 21 or 55 or 76 or 96 or 104                          | 169900 |
| <b>106</b> | cupping.mp.                                          | 1908   |
| <b>107</b> | ventouse.tw.                                         | 411    |
| <b>108</b> | exp phlebotomy/                                      | 9427   |
| <b>109</b> | bloodletting.mp.                                     | 672    |
| <b>110</b> | blood letting.mp.                                    | 315    |
| <b>111</b> | blood-letting.mp.                                    | 315    |
| <b>112</b> | spilled blood.mp.                                    | 14     |
| <b>113</b> | venesection.mp.                                      | 743    |
| <b>114</b> | 106 or 107 or 108 or 109 or 110 or 111 or 112 or 113 | 12343  |
| <b>115</b> | 105 and 114                                          | 137    |

| <b>Ovid-AMED 1985 to December 2017</b> |                       | <b>Date: 2018.01.08.</b> |
|----------------------------------------|-----------------------|--------------------------|
| <b>Searches</b>                        |                       | <b>Results</b>           |
| <b>1</b>                               | Neck Pain/            | 1031                     |
| <b>2</b>                               | exp Brachial plexus/  | 282                      |
| <b>3</b>                               | cervical pain.mp.     | 75                       |
| <b>4</b>                               | neckache.mp.          | 0                        |
| <b>5</b>                               | cervicodynia.mp.      | 2                        |
| <b>6</b>                               | cervicalgia.mp.       | 13                       |
| <b>7</b>                               | brachialgia.mp.       | 6                        |
| <b>8</b>                               | brachial neuritis.mp. | 1                        |



|    |                                                     |      |
|----|-----------------------------------------------------|------|
| 9  | brachial neuralgia.mp.                              | 5    |
| 10 | neck pain.mp.                                       | 1380 |
| 11 | neck injur*.mp.                                     | 139  |
| 12 | brachial plexus neuropath*.mp.                      | 8    |
| 13 | brachial plexus neuritis.mp.                        | 1    |
| 14 | thoracic outlet syndrome/ or cervical rib syndrome/ | 43   |
| 15 | Torticollis/                                        | 70   |
| 16 | cervico brachial neuralgia.ti,ab.                   | 0    |
| 17 | cervicobrachial neuralgia.ti,ab.                    | 2    |
| 18 | (monoradicul* or monoradickl*).tw.                  | 0    |
| 19 | or/1-18                                             | 1941 |
| 20 | neck/                                               | 663  |
| 21 | neck muscles/                                       | 150  |
| 22 | exp cervical plexus/                                | 30   |
| 23 | exp cervical vertebrae/                             | 1647 |
| 24 | Atlanto axial joint/                                | 32   |
| 25 | Atlanto occipital joint/                            | 17   |
| 26 | spinal nerve roots/                                 | 92   |
| 27 | (odontoid* or cervical or occip* or atlant*).tw.    | 3929 |
| 28 | Axis/                                               | 9    |
| 29 | Odontoid process/                                   | 8    |
| 30 | Thoracic Vertebrae/                                 | 302  |
| 31 | cervical vertebrae.mp.                              | 1678 |
| 32 | cervical plexus.mp.                                 | 11   |
| 33 | cervical spine.mp.                                  | 1163 |
| 34 | (neck adj3 muscles).mp.                             | 311  |
| 35 | (brachial adj3 plexus).mp.                          | 203  |
| 36 | (thoracic adj3 vertebrae).mp.                       | 331  |
| 37 | neck.mp.                                            | 3781 |
| 38 | (thoracic adj3 spine).mp.                           | 355  |
| 39 | (thoracic adj3 outlet).mp.                          | 83   |
| 40 | trapezius.mp.                                       | 502  |
| 41 | or/20-40                                            | 7636 |

|    |                                                      |       |
|----|------------------------------------------------------|-------|
| 42 | exp pain/                                            | 20488 |
| 43 | exp injuries/                                        | 3007  |
| 44 | pain.mp.                                             | 29672 |
| 45 | ache.mp.                                             | 124   |
| 46 | sore.mp.                                             | 167   |
| 47 | stiff.mp.                                            | 228   |
| 48 | discomfort.mp.                                       | 991   |
| 49 | injur*.mp.                                           | 28051 |
| 50 | neuropath*.mp.                                       | 1781  |
| 51 | or/42-50                                             | 57325 |
| 52 | 41 and 51                                            | 4097  |
| 53 | myofascial pain syndromes/                           | 352   |
| 54 | exp "Sprains and Strains"/                           | 949   |
| 55 | exp Spinal Osteophytosis/                            | 35    |
| 56 | exp Neuritis/                                        | 62    |
| 57 | exp Arthritis/                                       | 5513  |
| 58 | Fibromyalgia/                                        | 1647  |
| 59 | spondylitis/ or discitis/                            | 77    |
| 60 | spondylosis/ or spondylolysis/ or spondylolisthesis/ | 140   |
| 61 | radiculopathy.mp.                                    | 285   |
| 62 | radiculitis.mp.                                      | 10    |
| 63 | temporomandibular.mp.                                | 582   |
| 64 | myofascial pain syndrome*.mp.                        | 424   |
| 65 | thoracic outlet syndrome*.mp.                        | 80    |
| 66 | spinal osteophytosis.mp.                             | 41    |
| 67 | neuritis.mp.                                         | 78    |
| 68 | spondylosis.mp.                                      | 130   |
| 69 | spondylitis.mp.                                      | 358   |
| 70 | spondylolisthesis.mp.                                | 154   |
| 71 | or/53-70                                             | 9763  |
| 72 | 41 and 71                                            | 794   |
| 73 | exp neck/                                            | 710   |

|            |                                                                        |      |
|------------|------------------------------------------------------------------------|------|
| <b>74</b>  | exp cervical vertebrae/                                                | 1647 |
| <b>75</b>  | Thoracic Vertebrae/                                                    | 302  |
| <b>76</b>  | neck.mp.                                                               | 3781 |
| <b>77</b>  | (thoracic adj3 vertebrae).mp.                                          | 331  |
| <b>78</b>  | (thoracic adj3 spine).mp.                                              | 355  |
| <b>79</b>  | cervical spine.mp.                                                     | 1163 |
| <b>80</b>  | or/73-79                                                               | 5755 |
| <b>81</b>  | Intervertebral Disk/                                                   | 327  |
| <b>82</b>  | (disc or discs).mp.                                                    | 1209 |
| <b>83</b>  | (disk or disks).mp.                                                    | 985  |
| <b>84</b>  | or/81-83                                                               | 1693 |
| <b>85</b>  | 80 and 84                                                              | 225  |
| <b>86</b>  | herniat*.mp.                                                           | 390  |
| <b>87</b>  | slipped.mp.                                                            | 27   |
| <b>88</b>  | prolapse*.mp.                                                          | 122  |
| <b>89</b>  | displace*.mp.                                                          | 2548 |
| <b>90</b>  | degenerat*.mp.                                                         | 1676 |
| <b>91</b>  | (bulge or bulged or bulging).mp.                                       | 63   |
| <b>92</b>  | or/86-91                                                               | 4467 |
| <b>93</b>  | 85 and 92                                                              | 141  |
| <b>94</b>  | intervertebral disk degeneration/ or intervertebral disk displacement/ | 342  |
| <b>95</b>  | intervertebral disk displacement.mp.                                   | 376  |
| <b>96</b>  | intervertebral disc displacement.mp.                                   | 1    |
| <b>97</b>  | intervertebral disk degeneration.mp.                                   | 29   |
| <b>98</b>  | intervertebral disc degeneration.mp.                                   | 22   |
| <b>99</b>  | intervertebral disk hernia/                                            | 0    |
| <b>100</b> | or/94-99                                                               | 414  |
| <b>101</b> | 80 and 100                                                             | 54   |
| <b>102</b> | 19 or 52 or 72 or 93 or 101                                            | 4732 |
| <b>103</b> | cupping.mp.                                                            | 173  |
| <b>104</b> | ventouse.tw.                                                           | 2    |
| <b>105</b> | exp Bloodletting/                                                      | 43   |

|     |                   |     |
|-----|-------------------|-----|
| 106 | exp Cupping/      | 101 |
| 107 | bloodletting.mp.  | 69  |
| 108 | blood letting.mp. | 30  |
| 109 | bloodletting.mp.  | 69  |
| 110 | spilled blood.mp. | 0   |
| 111 | venesection.mp.   | 0   |
| 112 | or/103-111        | 235 |
| 113 | 102 and 112       | 19  |

| <b>Cochrane Library</b> |                                     | <b>Date: 2018.01.09</b> |
|-------------------------|-------------------------------------|-------------------------|
| <b>Searches</b>         | <b>Results</b>                      |                         |
| 1                       | [mh ^"Neck pain"]                   | 845                     |
| 2                       | [mh "Brachial Plexus Neuropathies"] | 53                      |
| 3                       | cervical pain:ti,ab,kw              | 3071                    |
| 4                       | neckache:ti,ab,kw                   | 1                       |
| 5                       | cervicodynia:ti,ab,kw               | 1                       |
| 6                       | cervicalgia:ti,ab,kw                | 11                      |
| 7                       | brachialgia:ti,ab,kw                | 12                      |
| 8                       | brachial neuritis:ti,ab,kw          | 28                      |
| 9                       | brachial neuralgia:ti,ab,kw         | 17                      |
| 10                      | neck pain:ti,ab,kw                  | 4667                    |
| 11                      | neck injur*:ti,ab,kw                | 1417                    |
| 12                      | brachial plexus neuropath*:ti,ab,kw | 75                      |
| 13                      | brachial plexus neuritis:ti,ab,kw   | 28                      |
| 14                      | [mh ^"thoracic outlet syndrome"]    | 18                      |
| 15                      | [mh ^"cervical rib syndrome"]       | 1                       |
| 16                      | [mh ^Torticollis]                   | 98                      |
| 17                      | [mh "brachial plexus neuropathies"] | 53                      |
| 18                      | [mh "brachial plexus neuritis"]     | 25                      |
| 19                      | cervico brachial neuralgia:ti,ab,kw | 5                       |
| 20                      | cervicobrachial neuralgia:ti,ab,kw  | 115                     |

|    |                                                                                                                                                        |        |
|----|--------------------------------------------------------------------------------------------------------------------------------------------------------|--------|
| 21 | monoradicul* or monoradickl*;ti,ab,kw                                                                                                                  | 26     |
| 22 | #1 or #2 or #3 or #4 or #5 or #6 or #7 or #8 or #9 or #10 or #11 or #12 or #13 or #14 or #15 or #16 or #17 or #18 or #19 or #20 or #21                 | 7525   |
| 23 | [mh ^neck]                                                                                                                                             | 486    |
| 24 | [mh ^"neck muscles"]                                                                                                                                   | 216    |
| 25 | [mh "cervical plexus"]                                                                                                                                 | 111    |
| 26 | [mh "cervical vertebrae"]                                                                                                                              | 994    |
| 27 | [mh ^"atlanto-axial joint"]                                                                                                                            | 23     |
| 28 | [mh ^"atlanto-occipital joint"]                                                                                                                        | 8      |
| 29 | [mh ^"Cervical Atlas"]                                                                                                                                 | 4      |
| 30 | [mh ^"spinal nerve roots"]                                                                                                                             | 150    |
| 31 | [mh "brachial plexus"]                                                                                                                                 | 949    |
| 32 | odontoid* or cervical or occip* or atlant*:ti,ab,kw                                                                                                    | 16822  |
| 33 | [mh ^"odontoid process"]                                                                                                                               | 11     |
| 34 | [mh ^"Thoracic Vertebrae"]                                                                                                                             | 469    |
| 35 | cervical vertebrae:ti,ab,kw                                                                                                                            | 1086   |
| 36 | cervical plexus:ti,ab,kw                                                                                                                               | 217    |
| 37 | cervical spine:ti,ab,kw                                                                                                                                | 1609   |
| 38 | neck muscles:ti,ab,kw                                                                                                                                  | 704    |
| 39 | brachial plexus:ti,ab,kw                                                                                                                               | 1237   |
| 40 | thoracic vertebrae:ti,ab,kw                                                                                                                            | 584    |
| 41 | neck:ti,ab,kw                                                                                                                                          | 15234  |
| 42 | thoracic spine:ti,ab,kw                                                                                                                                | 741    |
| 43 | thoracic outlet:ti,ab,kw                                                                                                                               | 41     |
| 44 | trapezius:ti,ab,kw                                                                                                                                     | 530    |
| 45 | #23 or #24 or #25 or #26 or #27 or #28 or #29 or #30 or #31 or #32 or #33 or #34 or #35 or #36 or #37 or #38 or #39 or #40 or #41 or #42 or #43 or #44 | 33047  |
| 46 | [mh pain]                                                                                                                                              | 39333  |
| 47 | [mh injuries]                                                                                                                                          | 19901  |
| 48 | pain:ti,ab,kw                                                                                                                                          | 107702 |
| 49 | ache:ti,ab,kw                                                                                                                                          | 298    |
| 50 | sore:ti,ab,kw                                                                                                                                          | 2106   |
| 51 | stiff:ti,ab,kw                                                                                                                                         | 296    |

|           |                                                                                                                                                                             |        |
|-----------|-----------------------------------------------------------------------------------------------------------------------------------------------------------------------------|--------|
| <b>52</b> | discomfort:ti,ab,kw                                                                                                                                                         | 9125   |
| <b>53</b> | injur*:ti,ab,kw                                                                                                                                                             | 39318  |
| <b>54</b> | neuropath*:ti,ab,kw                                                                                                                                                         | 8396   |
| <b>55</b> | #46 or #47 or #48 or #49 or #50 or #51 or #52 or #53 or #54                                                                                                                 | 161760 |
| <b>56</b> | #45 and #55                                                                                                                                                                 | 10128  |
| <b>57</b> | [mh ^Radiculopathy]                                                                                                                                                         | 293    |
| <b>58</b> | [mh "temporomandibular joint disorders"]                                                                                                                                    | 614    |
| <b>59</b> | [mh "temporomandibular joint dysfunction syndrome"]                                                                                                                         | 179    |
| <b>60</b> | [mh "myofascial pain syndromes"]                                                                                                                                            | 451    |
| <b>61</b> | [mh "Sprains and Strains"]                                                                                                                                                  | 999    |
| <b>62</b> | [mh "Spinal Osteophytosis"]                                                                                                                                                 | 91     |
| <b>63</b> | [mh Neuritis]                                                                                                                                                               | 70     |
| <b>64</b> | [mh ^polyradiculopathy]                                                                                                                                                     | 13     |
| <b>65</b> | [mh arthritis]                                                                                                                                                              | 10946  |
| <b>66</b> | [mh ^Fibromyalgia]                                                                                                                                                          | 842    |
| <b>67</b> | [mh ^spondylitis]                                                                                                                                                           | 20     |
| <b>68</b> | [mh ^discitis]                                                                                                                                                              | 9      |
| <b>69</b> | [mh ^spondylosis]                                                                                                                                                           | 126    |
| <b>70</b> | [mh ^spondylolysis]                                                                                                                                                         | 11     |
| <b>71</b> | [mh ^spondylolisthesis]                                                                                                                                                     | 155    |
| <b>72</b> | radiculopathy:ti,ab,kw                                                                                                                                                      | 725    |
| <b>73</b> | radiculitis:ti,ab,kw                                                                                                                                                        | 38     |
| <b>74</b> | temporomandibular:ti,ab,kw                                                                                                                                                  | 1111   |
| <b>75</b> | myofascial pain syndrome*:ti,ab,kw                                                                                                                                          | 569    |
| <b>76</b> | thoracic outlet syndrome*:ti,ab,kw                                                                                                                                          | 35     |
| <b>77</b> | spinal osteophytosis:ti,ab,kw                                                                                                                                               | 95     |
| <b>78</b> | neuritis:ti,ab,kw                                                                                                                                                           | 550    |
| <b>79</b> | spondylosis:ti,ab,kw                                                                                                                                                        | 411    |
| <b>80</b> | spondylitis:ti,ab,kw                                                                                                                                                        | 1395   |
| <b>81</b> | spondylolisthesis:ti,ab,kw                                                                                                                                                  | 460    |
| <b>82</b> | #57 or #58 or #59 or #60 or #61 or #62 or #63 or #64 or #65 or #66 or #67 or #68 or #69 or #70 or #71 or #72 or #73 or #74 or #75 or #76 or #77 or #78 or #79 or #80 or #81 | 17164  |

|            |                                                      |       |
|------------|------------------------------------------------------|-------|
| <b>83</b>  | #45 and #82                                          | 1519  |
| <b>84</b>  | [mh neck]                                            | 486   |
| <b>85</b>  | [mh "cervical vertebrae"]                            | 994   |
| <b>86</b>  | [mh ^"thoracic vertebrae"]                           | 469   |
| <b>87</b>  | neck:ti,ab,kw                                        | 15234 |
| <b>88</b>  | thoracic vertebrae:ti,ab,kw                          | 584   |
| <b>89</b>  | thoracic spine:ti,ab,kw                              | 741   |
| <b>90</b>  | cervical spine:ti,ab,kw                              | 1609  |
| <b>91</b>  | #84 or #85 or #86 or #87 or #88 or #89 or #90        | 14188 |
| <b>92</b>  | [mh ^"Intervertebral Disk"]                          | 271   |
| <b>93</b>  | disc\$:ti,ab,kw                                      | 3867  |
| <b>94</b>  | #92 or #93                                           | 3867  |
| <b>95</b>  | #91 and #94                                          | 541   |
| <b>96</b>  | herniat*:ti,ab,kw                                    | 1225  |
| <b>97</b>  | slipped:ti,ab,kw                                     | 49    |
| <b>98</b>  | prolapse*:ti,ab,kw                                   | 1996  |
| <b>99</b>  | displace*:ti,ab,kw                                   | 4124  |
| <b>100</b> | degenerat*:ti,ab,kw                                  | 5989  |
| <b>101</b> | bulge or bulged or bulging:ti,ab,kw                  | 279   |
| <b>102</b> | #96 or #97 or #98 or #99 or #100 or #101             | 12784 |
| <b>103</b> | #95 and #102                                         | 372   |
| <b>104</b> | [mh ^"intervertebral disk degeneration"]             | 205   |
| <b>105</b> | [mh ^"intervertebral disk displacement"]             | 746   |
| <b>106</b> | intervertebral disk displacement:ti,ab,kw            | 247   |
| <b>107</b> | intervertebral disc displacement:ti,ab,kw            | 812   |
| <b>108</b> | intervertebral disk degeneration:ti,ab,kw            | 238   |
| <b>109</b> | intervertebral disc degeneration:ti,ab,kw            | 416   |
| <b>110</b> | intervertebral disk hernia                           | 419   |
| <b>111</b> | #104 or #105 or #106 or #107 or #108 or #109 or #110 | 1529  |
| <b>112</b> | #91 and #111                                         | 277   |
| <b>113</b> | #112 or #103 or #83 or #56 or #22                    | 11540 |
| <b>114</b> | cupping:ti,ab,kw                                     | 340   |
| <b>115</b> | ventouse:ti,ab,kw                                    | 56    |

|     |                                                              |     |
|-----|--------------------------------------------------------------|-----|
| 116 | MeSH descriptor: [Bloodletting] explode all trees            | 100 |
| 117 | bloodletting:ti,ab,kw                                        | 159 |
| 118 | blood letting:ti,ab,kw                                       | 77  |
| 119 | blood-letting:ti,ab,kw                                       | 72  |
| 120 | spilled blood:ti,ab,kw                                       | 6   |
| 121 | venesection:ti,ab,kw                                         | 60  |
| 122 | #114 or #115 or #116 or #117 or #118 or #119 or #120 or #121 | 596 |
| 123 | #113 and #122                                                | 43  |

### CHINA Academic Journals Full-text Database

(SU='颈痛' OR SU='颈肩痛' OR SU='颈椎病' OR SU='颈肩部' OR SU='颈椎间盘突出症' OR SU='颈部' OR SU='神经根型颈椎病') AND (SU='罐' OR SU='cupping') AND (SU='随机' or SU='对照') 193

颈痛 : neck pain in Chinese / 颈肩痛 : neck pain in Chinese / 颈椎病 : cervical spondylosis in Chinese / 颈肩部 : neck in Chinese / 颈椎间盘突出症 : cervical disc herniation in Chinese / 颈部 : neck in Chinese / 神经根型颈椎病 : cervical radiculopathy in Chinese / 罐 : cupping in Chinese / 随机 : random in Chinese / 对照 : controlled in Chinese

### Korean databases

| KoreaMed (Date : 2018.01.11) |                       |   |
|------------------------------|-----------------------|---|
| 1                            | 경항통 and 부항            | 0 |
| 2                            | neck pain and cupping | 0 |
| 3                            | 頸項痛 and 罐             | 0 |



| KMBASE (Date : 2018.01.11) |                       |   |
|----------------------------|-----------------------|---|
| 1                          | 경항통 and 부항            | 0 |
| 2                          | neck pain and cupping | 0 |
| 3                          | 頸項痛 and 罐             | 0 |
|                            |                       |   |

| OASIS (Date : 2018.01.11) |                       |   |
|---------------------------|-----------------------|---|
| 1                         | 경항통 and 부항            | 0 |
| 2                         | neck pain and cupping | 0 |
| 3                         | 頸項痛 and 罐             | 0 |
|                           |                       |   |

| NDSL (Date : 2018.1.11) |                       |    |
|-------------------------|-----------------------|----|
| 1                       | 경항통 and 부항            | 0  |
| 2                       | neck pain and cupping | 37 |
| 3                       | 頸項痛 and 罐             | 0  |
|                         |                       |    |

| KISS (Date : 2018. 01. 11) |                       |   |
|----------------------------|-----------------------|---|
| 1                          | 경항통 and 부항            | 0 |
| 2                          | neck pain and cupping | 5 |
| 3                          | 頸項痛 and 罐             | 5 |

경항통 : neck pain in Korean / 부항 : cupping in Korean / 頸項痛 : neck pain in Chinese / 罐 :

cupping in Chinese

## Japan database

| J-stage (Date : 2018. 01. 11) |                   |    |
|-------------------------------|-------------------|----|
| 1                             | neck pain cupping | 15 |

| 医学中央雑誌刊行会(Ichushi)(Date : 2018. 01. 11) |                                               |        |
|-----------------------------------------|-----------------------------------------------|--------|
| #1                                      | (頸椎症性脊髄症/TH or 頸椎症/AL)                        | 10,553 |
| #2                                      | 頸椎椎間板ヘルニア/AL                                  | 1077   |
| #3                                      | ((@頸椎/TH and @脊椎損傷/TH and @捻挫/TH) or 頸椎捻挫/AL) | 327    |
| #4                                      | (頸部痛/TH or 頸部疼痛/AL)                           | 2188   |
| #6                                      | 頸肩部痛/AL                                       | 64     |
| #7                                      | #1 or #2 or #3 or #4 or #5 or #6              | 13698  |
| #8                                      | cupping/AL                                    | 38     |
| #9                                      | 吸角/AL                                         | 30     |
| #10                                     | #8 or #9                                      | 66     |
| #11                                     | #7 AND #10                                    | 1      |

頸椎症 : cervical spondylosis in Japanese / 頸椎椎間板ヘルニア: cervical disc herniation in Japanese /

頸椎 : cervical vertebrae in Japanese / 脊椎損傷 : vertebral injury in Japanese / 捻挫 : sprain in

Japanese / 頸椎捻挫 : sprain of cervical spine in Japanese / 頸部痛 : neck pain in Japanese / 頸部疼

痛 : neck pain in Japanese / 頸肩部痛 : neck pain in Japanese / 吸角 : cupping in Japanese
